# Supplementary material
Source: PubMed Central journal article supplement (PMC6859351)
Supplement: pnas.1908430116.sapp.pdf [file pnas.1908430116.sapp.pdf]

# PNAS

[www.pnas.org](http://www.pnas.org)

## Supplementary Information for

### **A Century of Research on Conscientiousness at Work**

Michael P. Wilmot\*, Deniz S. Ones

\*Corresponding author. Emails: [mp.wilmot@utoronto.ca](mailto:mp.wilmot@utoronto.ca) , [onesx001@umn.edu](mailto:onesx001@umn.edu)

#### **This PDF file includes:**

- Supplementary text
- Tables S1 to S20
- Appendix for artifact distributions used in corrections
- References for supplemental information
- References for meta-analyses included in second-order review

## Supplementary Methods

### Literature Search

We used four search strategies to locate Conscientiousness (C) meta-analyses appearing between January 1990 and December 31, 2018. We used the following search string in (a) PsycINFO [(meta-analy\* OR quantitative review OR systematic review).m\_titl. AND (personality OR trait OR temperament OR (Five Factor Model) OR FFM OR (Big Five) OR Conscientiousness OR Extraversion OR Openness OR Agreeableness OR (Emotional Stability) OR Neuroticism).mp], and (b) a parallel string in Web of Science, (c) gathered studies from the reference sections of reviews of Big Five meta-analyses (1, 2, 3, 4, 5, 6, 7, 8, 9, 10, 11), and (d) conducted manual searches, on December 31, 2018, for in-press articles in outlets that frequently publish work relevant meta-analyses (i.e., *European Journal of Personality*, *European Journal of Work and Organizational Psychology*, *Human Performance*, *International Journal of Selection and Assessment*, *Journal of Applied Psychology*, *Journal of Management*, *Journal of Occupational and Organizational Psychology*, *Journal of Personality and Social Psychology*, *Journal of Research in Personality*, *Journal of Vocational Behavior*, *Personality and Individual Differences*, *Personality and Social Psychology Review*, *Personnel Psychology*, *Psychological Bulletin*). The total number of records identified through electronic searches was 5,482. We gathered a further 43 records from reference sections and in-press articles. After removing duplicate records, a total of 2,213 records remained eligible for our initial article screening.

### Article Inclusion Criteria

A record had to meet four criteria to be included in our final database. Specifically, it had to be (a) a meta-analysis (i.e., primary studies excluded), (b) published (i.e., unpublished theses, dissertations, and conference papers excluded), (c) in the English language, (d) that reported the

zero-order relation of C to at least one work relevant variable. Records were dropped following their first missed criterion. After the initial screening, 1,692 records were excluded because they were not meta-analyses, did not report a relation to C, or both. Next, we excluded 47 unpublished records and 23 non-English publications. Finally, we excluded 315 records because they did not report an effect for an occupational variable. Thus, after screening, 136 published meta-analytic records were included in our final database.

### **Meta-Analytic Database**

We systematically extracted relevant descriptive statistics from qualifying meta-analyses, including the name, source, and operational description of the focal variable, its total number of independent samples (i.e.,  $k$ ), total sample size (i.e.,  $N$ ), mean sample-size weighted observed effect size (e.g.,  $\bar{r}$ ,  $\bar{d}$ , or  $\bar{z}$ ), and an index of between-studies variability, which is detailed below. Information concerning the reliability of a predictor and/or a criterion measure was also coded or estimated. A doctoral student with training in personality and meta-analysis extracted the basic descriptive information. The first author compared the extracted data to the published records and made corrections as needed. Several meta-analyses did not report complete descriptive data, so some estimation and transformations were required, which we explain in detail below.

**Estimating  $N$ .** Several meta-analyses reported  $k$  and  $N$  data for an overall meta-analysis (e.g., leadership; Meta-analysis Ref. 42), but did not report the sample size for criterion-specific moderator analyses (e.g., emergence vs effectiveness; p. 772). Accordingly, we estimated the criterion-specific  $N$ s from the total meta-analytic sample (i.e.,  $N_{specific} = \frac{N_{total}}{k_{total}} * k_{specific}$ ).

**Estimating  $\bar{r}$ .** Some meta-analyses reported effect sizes as  $z$ -values, which we converted to Pearson correlation coefficients using Fisher's (12)  $z$ -to- $r$  transformation.

**Estimating  $SD_r$ .** Several meta-analyses did not report the observed (i.e., uncorrected)

between-studies standard deviation in effect sizes (i.e.,  $SD_r$ ). However, most studies provided other indices of variability, which we used to estimate  $SD_r$ .

For meta-analyses reporting confidence intervals (CI) or credibility intervals (CR) around *observed* effects (i.e.,  $\bar{r}$ ), we converted values to standard deviation units based on the degree of certainty reported for the particular interval (i.e., 80%, 90%, 95%). Estimating  $SD_r$  from CR is straightforward because  $SD_r$  is the only value used in computing the credibility interval (i.e.,  $CR = \bar{r} \pm z_\alpha * SD_r$ ). Estimating  $SD_r$  from  $SE_r$  is also possible in random effects meta-analysis because the former is incorporated into the estimation of the latter (i.e.,  $CI \approx \bar{r} \pm z_\alpha * SD_r / \sqrt{k}$ ). As a result, for meta-analyses reporting standard errors around the mean meta-analytic effect (or, confidence intervals based on  $SE_r$ ), we estimated  $SD_r$  using an approximation formula (i.e.,  $SD_r \approx \sqrt{k} * SE_r$ ; 13; see also 14).

For meta-analyses reporting confidence intervals or credibility intervals around *corrected* effects (i.e.,  $\bar{\rho}$ ), first, we attenuated values using reliability coefficients for C and/or the criterion variable. For meta-analyses reporting corrected effects, but not reporting reliability coefficients used to compute them, we estimated reliability from the attenuation factor (i.e.,  $A = \bar{r} / \bar{\rho}$ ) of that variable's relation to C, and the square root of C's reported frequency-weighted meta-analytic internal consistency estimate (15;  $\bar{\alpha} = .72$ ,  $\sqrt{.72} = .84$ ). Again, we converted the values to  $SD_r$  based on the degree of certainty reported for the particular intervals (i.e., 80%, 90%, or 95%).

For meta-analyses reporting results according to alternative trait taxonomies, which were subsequently composited, a composite variance was not calculable. Instead, we used the average variance across the components of the composite as an estimate of between-studies variability.

Finally, for meta-analyses that failed to report *any* index of between-studies variance, we computed an estimate of the sampling error variance (i.e.,  $[1 - \bar{r}^2]^2 / [N/k - 1]$ ; see 13, p. 88).

All of these studies are marked accordingly in the following tables where they are found.

**Forming composites.** Two meta-analyses (Meta-analysis Ref. 18, 36) reported findings according to an alternative personality trait taxonomy that is similar, but not identical, to the Big Five. Specifically, relations were reported to C's lower-order facet traits of *Achievement* and *Dependability*. In these cases, we used linear composites (16) to estimate relations to C using the correlations reported in those meta-analyses, as well as the mean meta-analytic intercorrelation between Achievement and Dependability (17;  $\bar{r} = .45$ ,  $k = 16$ ,  $N = 6,696$ ).

**Additional information.** Variables were also coded according to the type of scale used to measure C (i.e., indirect vs direct measures; cf. Meta-analysis Ref. 39), the research context (i.e., general vs occupational settings), and the criterion-rating source (i.e., self-, informant-, mixed-ratings). For other-rated criteria, we noted the type of relationship (e.g., supervisor, peer, or subordinate). A final code was made indicating whether a variable was the subject of multiple meta-analyses. Although the effects for most variables were reported in only one meta-analysis, several (e.g., job performance) were included in multiple meta-analyses. To determine if these meta-analyses had overlapping constituent studies, we scrutinized their Methods and Reference sections. Meta-analyses that were explicitly updates of prior reviews, or had overlapping primary studies, were marked accordingly. However, meta-analyses with evidence of non-redundancy were highlighted for possible inclusion in second-order meta-analyses.

### **Variable Inclusion Criteria**

We extracted and coded a total of 733 work variables reporting effects across 136 meta-analyses. To be included in our review, a variable had to meet five criteria. Specifically, it had to (a) have sufficient data for analysis (i.e.,  $N$ ,  $k$ ,  $\bar{r}$  reported), (b) use self-reports of C (i.e., other- or mixed-ratings excluded), (c) relate to a consequential occupational or education relevant variable

(cf. 8; nonwork variables [e.g., demographics, cognitive ability, clinical diagnoses] excluded), (d) permit its inferences to the general working population (i.e., job-specific studies excluded), and (e) come from an independent meta-analysis (i.e., only one effect per variable included). Variables were dropped following their first missed criterion. For variables reporting multiple, non-independent effects, the effect from the more comprehensive meta-analysis was used. For variables reporting multiple, independent effects, effects were combined using second-order meta-analysis. In total, 175 variables reported in 92 meta-analyses met our inclusion criteria.

To qualify for inclusion in our review of occupation-specific performance, a variable had to meet the same inclusion criteria, except criterion (d). For occupations reporting multiple, non-independent effects, the one from the more comprehensive or newer meta-analysis was selected. For occupations reporting multiple, non-independent effects, effects were combined by second-order meta-analysis. Eight occupations reported in nine meta-analyses met the inclusion criteria: *Customer Service, Health Care, Managerial, Military, Police, Professional, Skilled/Semi-Skilled, and Sales* (see Table S2 for specific details).

### **Meta-Analytic Procedures**

No new meta-analyses were conducted in this study. Instead, procedures from Hunter and Schmidt's (13) psychometric meta-analysis were used to update estimates from meta-analyses included in our review using a common set of statistical corrections. Our goal was that statistical artifacts be similarly addressed across contributing records. To correct for error in measurement, frequency-weighted artifact distributions were developed from data in their source meta-analysis or from other sources in the literature (e.g., 18). All distributions and sources are reported in the Appendix. To correct for error in measuring  $C$ , we used the internal consistency of  $\bar{\alpha} = .79$  (19). Internal consistencies were used to correct for error in self-report or objective criteria, but inter-

rater reliabilities were used to correct for error in other-rated variables (20). Finally, because of sporadic reporting, we did not correct for range restriction.

**First-order meta-analyses.** All meta-analyses included in our review had a common set of statistics. First, the descriptive statistics (i.e.,  $k$ ,  $N$ , mean sample-size weighted observed  $\bar{r}$ , and its standard deviation,  $SD_r$ ) that are reported in, or estimated from, their source meta-analysis. Next, we used Hunter–Schmidt procedures to estimate the variance attributable to sampling and measurement error, which were subtracted from the observed variance. The observed correlation was also corrected for attenuation due to measurement error. Corrections were used to estimate the mean population correlation ( $\bar{\rho}$ ) and its associated standard deviation ( $SD_\rho$ ). Although  $\bar{r}$  and  $\bar{\rho}$  are both parameter estimates, the latter is corrected for statistical artifacts, but the former is not. Finally, around the parameters, confidence and credibility intervals were calculated. Confidence intervals (CI) estimate the boundaries wherein the observed correlation is expected to fall based on the standard error of between-study effects. In contrast, credibility intervals (CR) estimate between-studies heterogeneity in population effects and are calculated using  $SD_\rho$ . CIs involve estimates of observed effects and tend to be smaller given larger pooled samples, whereas CRs bound “true” effect distributions and may be larger or smaller depending on generalizability. Estimates with CRs omitting zero are interpreted as generalizing across contexts (13).

**Second-order meta-analyses.** Several meta-analyses reported results from multiple, non-overlapping meta-analyses, which were combined using second-order meta-analysis procedures. Second-order meta-analysis uses basic descriptive statistics (i.e.,  $k$ ,  $N$ ,  $\bar{r}$ , and  $SD_r$ ) and mean population correlations ( $\bar{\rho}$ ) from two or more first-order meta-analyses. All second-order meta-analyses had a common set of statistics. First,  $m$  summarizes the number of contributing first-order meta-analyses. Second-order sampling error was estimated for each first-order meta-

analytic effect (i.e.,  $VAR_2$ ). Next, the grand mean second-order population effect (i.e.,  $\bar{\rho}_M$ ) was estimated, as well as three variance components: (a)  $VAR_{2M}$ , which is the mean variance of first-order meta-analyses corrected for sampling and measurement error, (b)  $VAR_{2SE}$ , which is the variance due to second-order sampling error, and (c)  $VAR_{True}$ , which is the difference between the prior two components. When  $VAR_{True}$  is zero or negative, this suggests that all remaining variance from first-order meta-analysis is accounted for by second-order sampling error (Meta-analysis Ref. 75).

Second-order meta-analyses of C's effects were run for seven Motivations, Values, and Interests variables, 10 Interpersonal variables, seven Attitudes and Well-Being variables, two Counterproductivity variables, and 13 Performance variables (see Tables S10-S14), and for all eight occupations (Table S15). We report full output, including sources for and statistics from contributing meta-analyses below. We also report relevant parameter estimates (i.e.,  $\bar{\rho}_M$ ,  $SD_\rho$ ) in Tables S4-S9, each of which summarizes meta-analyses across the organizing framework below.

### **Organizational Framework for Qualifying Variables**

For purposes of reporting, we arranged variables into a framework (11) of five conceptual categories defined based on descriptions adapted from the literature: *Motivations, Values, and Interests* (i.e., internal forces that influence direction, intensity, and persistence of occupational affect, cognitions, and behavior); *Interpersonal* (i.e., behavior involving interpersonal interaction with or influence of others to pursue shared goals, as well as outcomes of successful interaction or influence); *Attitudes and Well-Being* (i.e., emotional or cognitive evaluations of occupational phenomena and its influence on individuals' psychological well-being); *Counterproductivity* (i.e. behavior reflecting social or moral impairment that detracts from occupational goals, as well as outcomes of misbehavior; and *Performance* (i.e., behavior that contributes to occupational goals,



as well as outcomes of successful contribution). The framework also includes four major career domains that individuals encounter across their working lives: *Education*, *Job Application*, *On the Job*, and *Career/Lifespan*, which subdivide findings within each of the conceptual categories. Table S1 presents descriptions and meta-analytic sources for all 175 occupational variables that qualified for inclusion in our review within the aforementioned organizing framework.

### **Organizational Framework for Occupations**

To report occupation-specific performance findings, we arranged occupations according to the complexity associated with their technical work demands. To do so, we used occupational complexity ratings provided in the Dictionary of Occupational Titles (21), which is a catalogue of occupations reported in the United States between 1939 to 1977. In the fourth edition of the DOT, more than 12,000 occupations were rated for complexity by job analysts. DOT classifies occupations by a 9-digit code (e.g., 189.117-022; manager, industrial organization), with digits four, five, and six representing complexity with Data, People, and Things, respectively. DOT occupational complexity ratings range from 0 to 9 and smaller scores indicate higher complexity.

To rank the complexity of the eight occupations qualifying for our review, we reviewed the Methods sections of their source meta-analyses to determine which specific occupations were reported as being included in the meta-analyses of a larger, occupational group (e.g., engineers, architects, attorneys, accountants, teachers, doctors, and ministers cumulated as “Professional” occupations; Meta-analysis Ref. 5). When authors reported specific occupations, we used them to search the DOT to find the nearest corresponding occupational title and its complexity ratings across Data, People, and Things dimensions. When authors did *not* list specific occupations, but reported a larger, occupational group (e.g., sales; e.g., Meta-analysis Ref. 39), we searched the DOT for a general occupation title that most closely approximated that larger group occupation.

Table S2 provides a summary of occupations included in C meta-analyses and their associated DOT occupational complexity ratings.

To form an index of occupational complexity for each of the eight occupations, we computed the grand mean complexity rating across meta-analyses and across Data, People, and Things dimensions. We used scores to rank the eight occupations from least to most complex.

### **Evaluations of Publication Bias and Sensitivity Analyses**

Publication bias and questionable research practices may influence the scientific record (22, 23). Meta-analyses are not immune from these influences and methods have been proposed to test for their effects. To ensure the accuracy of our results, we conducted evaluations of publication bias and sensitivity analyses for meta-analyses contributing to our review, and sensitivity analyses for second-order meta-analyses presented, which we explain in detail below.

**Publication bias and sensitivity analyses in first-order meta-analyses.** Publication and reporting bias (also referred to as availability bias or dissemination bias; 13, 24) can threaten the veracity and accuracy of meta-analysis. Accordingly, it is relevant to evaluate whether these potential biases threaten the validity of C meta-analyses contributing to our review. Publication and reporting bias refer to unrepresentative studies being included in meta-analyses, which skew the scientific record, and lead to erroneous conclusions (22, 23). Not all studies are available to meta-analysts. As a result, to the extent that unavailable studies have systematically different results than results of available studies, the reported meta-analytic effects would be biased.

The concern about studies that link traits such as C to occupational variables is that the studies available to the meta-analyst may overstate the true magnitudes of its effects. The reason for overstatement is that the published research may reflect the so-called “file drawer problem” (25, 26, 27), which posits that statistically nonsignificant results tend to remain unpublished,

whereas statistically significant results tend to appear in peer-reviewed journals. Publication bias occurs at the primary study level, but meta-analyses can be affected by it to the extent that they draw on published findings. That is, if significant results get published and nonsignificant results are unpublished, then meta-analyses based on the published literature would be upwardly biased.

Scholars have detailed several potential sources of publication bias (28). Regardless of etiology, two broad sets of approaches can be used to assess and guard against publication bias.

***Post hoc approaches.*** The first set of approaches assesses and addresses publication bias *after* a meta-analysis has been conducted. Contributing data and results are examined to evaluate (a) whether there is evidence of publication bias, and (b) whether the results would be different if the contributing data were differently composed. The former includes assessments of magnitudes of effects included in the meta-analysis and publication status of contributing studies, cumulative meta-analysis, forest plots, and other symmetry-based methods (i.e., funnel plots, Egger's test of intercept, Begg and Mazumdar's rank correlation; 29). The latter includes methods that impute "missing" effects to estimate what results would be if such studies had been included (e.g., Duval and Tweedie's trim-and-fill, *p*-uniform method; 29), or evaluate magnitudes of effect sizes from different contributing sources separately (i.e., published versus unpublished studies). The goal of all such sensitivity analyses is to investigate the robustness of meta-analyses to publication bias.

***Preventative approaches.*** The second set of approaches aim to guard against publication bias and are preferable to dealing with these issues after the fact. Preventative approaches entail *proactive* efforts to include all relevant published and unpublished studies in a meta-analysis. Including large numbers of unpublished studies is a common practice that aims to reduce the impact of the file drawer effect (30, 31, 32) and is an approach recommended by leading meta-analysis methodologists (13, 33). Including both published and unpublished studies, especially

when the latter is proportionately sizable, is instrumental to limiting publication bias in meta-analyses (29).

**Centrality considerations.** A third consideration that may guard meta-analyses against publication bias is determining whether or not a particular variable is of central interest. Some meta-analyses examine relations to variables that are not central to the research question, but are reported incidentally (e.g., demographic variables, such as age, are often reported, but may not pertain to hypotheses). Publication bias is much less likely in these circumstances, because there is little-to-no incentive to distort the reporting of relations to incidental variables (see also 13). Because meta-analyses reporting relations to C also tend to report relations to the remaining Big Five traits, and/or other personality constructs, non-focal considerations may be relevant.

**Evaluations of approaches in first-order meta-analyses.** We undertook an evaluation of post hoc and preventive approaches used in addressing publication bias in C meta-analyses qualifying for inclusion in our review. We also used several approaches to determine whether C was a central variable in these meta-analyses. To conduct these evaluations, we coded the full set of 92 contributing meta-analyses. The two authors each coded 51 meta-analyses for (a) general descriptive information, (b) post hoc approaches that assess and address publication bias and sensitivity analyses, (c) preventive approaches to guard against publication bias, and (d) features relevant to centrality considerations. To ensure consistency, both authors also coded 10 meta-analyses. Intercoder agreement was good (i.e.,  $\kappa = .88$ ; 282 out of 300 coded characteristics relevant to publication bias) and coders resolved minor discrepancies through discussion and jointly checking the coded meta-analyses. Descriptions for the coded information are provided in Table S16 and the coded data themselves are presented in Table 17.

**General descriptive statistics.** As the descriptive statistics in Table S17 (columns 1-5) show, the 92 meta-analyses qualifying for our review were mostly published in the past decade; the mean year of publication was 2011 ( $SD = 6$  years). The average number of primary records (i.e., sources not studies) contributing to these meta-analyses was 90 ( $SD = 78$ ) and the average number of studies pertaining to C per meta-analysis was  $k = 78$  ( $SD = 125$ ). Because this average included meta-analyses that reported C's relations to multiple occupational variables in the same study, we examined the total number of variables reporting relations to C (regardless of whether these variables ultimately qualified for inclusion in our review). Overall, meta-analyses reported C's relations to 3.90 variables ( $SD = 3.42$ ), on average. Adjusting for the number of occupational variables, the average number of studies per variable across C meta-analyses was  $k = 19.88$  (i.e.,  $78 / 3.90$ ). This value is notable because results indicate that meta-analyses with  $k \geq 20$  tend to result in robust parameter estimates and minimize the biasing influence of sampling error (13).

**Evaluation of post hoc approaches.** Many advanced methods of assessing publication bias were proposed in the 1990s (e.g., Begg and Mazumdar's rank correlation; 34), but were only popularized in the last decade, due to the surging interest and participation in unbiased and open science. The publication of the seminal book, "Publication Bias in Meta-Analysis: Prevention, Assessment, and Adjustments," (35) gave meta-analysts a key resource to deal with publication bias. Because many of our qualifying meta-analyses were published before these methods were popularized, only a subset of them reported advanced publication bias and sensitivity analyses. To evaluate the reporting of publication bias examinations, we coded for both traditional (e.g., Failsafe  $N$ ) and advanced methods to assessing publication bias (e.g., funnel plots, cumulative meta-analysis, Egger's test of the intercept, Begg and Mazumdar's rank correlation test, as well as other approaches; for additional details on all these methodologies, see 35).

Table S17 presents a summary of post hoc publication bias assessments available in the contributing meta-analyses and their associated conclusions (see columns 6-9). Altogether, 37 meta-analyses (or, 40%) reported at least one post hoc approach for assessing publication bias.

Regarding methods for assessing publication bias, 5 meta-analyses reported Failsafe  $N$ s. However, it should be noted that this traditional approach is no longer recommended because the greater the publication bias in a published literature, the greater the indication from Failsafe  $N$  that that meta-analysis is robust (36). Beyond Failsafe  $N$ , 12 meta-analyses reported advanced publication bias analyses, and 6 of these reported using multiple methods. When results converge across multiple publication bias methods, subsequent conclusions are more credible. Critically then, in 82% of meta-analyses for which publication bias analyses were available, the reported conclusion was that there was no bias or negligible bias. In fact, evidence of publication bias was found in only 2 meta-analysis (i.e., Meta-analysis Ref. 61 and 78) and both effects were small.

Sensitivity analyses address the question of whether findings would be different if the contributing data were differently composed. As such, they help reveal the robustness of meta-analyses to publication bias. As Table S17 (column 6) shows, 20 meta-analyses performed outlier analyses, and 12 used trim-and-fill or similar approaches used to estimate the magnitudes of  $C$  relations once “missing” studies were synthetically imputed. The magnitude of differences between the observed and estimated effects (i.e., estimated by trim-and-fill or a similar method) ranged from .00 to .06 (Mean = .03). Finally, 15 meta-analyses separately evaluated magnitudes of effects for published versus unpublished studies; for 14 of them, differences were negligible-to-small (e.g., .03, .05, .07 correlational points; see Table S17). What is more, in 2 cases (e.g., Meta-Analysis Ref. 15, 31), unpublished effects were nominally larger than published effects.

Overall, evaluation of the available evidence using post hoc approaches indicates that contributing C meta-analyses included in our review tended to be very robust to publication bias.

***Evaluation of preventative approaches.*** Systematic searches and including unpublished studies in meta-analyses help provide confidence that publication bias has been minimized (28). Accordingly, Table S17 (column 10) shows that 47 meta-analyses (or, 51%) explicitly discussed publication bias and authors' preventive steps taken to minimize it (e.g., extra steps taken to get and include unpublished research, such as contacting scholars for unpublished studies, obtaining previously unanalyzed data containing variables of interest; not including studies reporting only significant findings/screened results).

In addition, to the extent that unpublished studies are included in a meta-analysis, we have confidence that estimates accurately reflect population parameters. As Table S17 (column 11) shows, for 87 meta-analyses, it was possible to calculate the proportion of contributing studies that were unpublished or published. Among them, 8 included only published studies (notably, 3 of the 8 also reported advanced publication bias or sensitivity analyses and found no evidence of bias) and 4 meta-analyses included only unpublished (e.g., archival) studies. For the remaining 75 meta-analyses, the proportion of unpublished research included was, on average, 28% ( $SD = 19\%$ ) and for 16 of them, 40% or more of the contributing studies were unpublished.

Overall, the relatively large proportion of unpublished research suggests that prevention of publication bias was a major consideration in culling primary studies for meta-analyses of C.

***Evaluation of centrality considerations.*** The final consideration that may protect meta-analyses against publication bias is determining whether a variable included is of central interest. The first consideration was determining whether personality constructs were central constructs of interest or were secondary considerations (i.e., to function as controls or covariates in models, or

to provide supplemental evidence of convergent or discriminate validity). As Table S17 (column 12) shows, personality was not a central consideration in 43% of contributing meta-analyses.

Next, we examined whether C was a central consideration by determining whether it was the sole personality construct included in contributing meta-analyses or if other constructs were also included alongside C. Results in Table S17 show that C was not the focal variable of interest in the overwhelming number meta-analyses. First, in 99% of them, other personality constructs' relations to occupational variables were examined alongside those of C (see column 13). In only 1 meta-analysis (Meta-Analysis Ref. 58) was C the sole personality construct tested—but even in this case, several non-personality variables were also included. Second, in 92% of meta-analyses, relations were reported for all Big Five traits to the variable(s) of interest (column 14). Third, in 37% of meta-analyses, relations to personality constructs other than the Big Five were reported, including: lower order traits of the Big Five (e.g., Meta-Analysis Ref. 17, 35, 39), negative and positive affect (e.g., Meta-Analysis Ref. 2, 15, 19, 90), or compound traits, such as core self-evaluations, general self-efficacy, locus of control, proactive personality, self-esteem, or other miscellaneous traits (e.g., Meta-Analysis Ref. 19, 25, 27, 59, 70, 79; see column 15). As a result, there was little-to-no incentive affecting the reporting of C's effects vis-a-vis other personality constructs. Much to the contrary, finding that a personality construct other than C was linked to a key occupational variable would be more surprising and, as a result, much more incentivizing.

Overall, the preceding evidence indicates that C was not the central construct of interest in most of our contributing meta-analyses. Publication bias is less likely in these circumstances, because there is little-to-no incentive to distort the reporting of relations to incidental variables.

**Sensitivity analyses in second-order meta-analyses.** Discussions of publication bias and questionable research practices in meta-analysis should be supplemented by considerations



about sampling error, outlier meta-analyses, and alternative meta-analyses to be used in second-order cumulation.

**Small- $k$  meta-analyses.** Although more meta-analyses are better, it is both possible and reasonable to combine as few as two first-order meta-analyses (Meta-analysis Ref. 75, p. 211). However, because second-order meta-analysis methods use inverse variance weights in cumulating effects (i.e.,  $k_{weighted} = \frac{1}{var_r} * k$ ), first-order sampling error can have an outsized influence when  $k$  and  $m$  (i.e., total number of meta-analyses to be combined) are small. Specifically, when  $k = 2$ , second-order grand mean population parameters tend to be biased in the direction of the meta-analysis with smaller  $k$  and  $SD_r$ . However, because such meta-analyses are more susceptible to first-order sampling error, a way to mitigate these effects is to impute the observed  $SD_r$  with the  $SD_r$  from the meta-analysis with the largest  $k$  (cf. 11). Accordingly, we compared results of observed versus imputed  $SD_r$  for 10 applicable second-order meta-analyses (see Table S18).

Table S18 presents results of sensitivity analyses for small- $k$  meta-analyses. For 10 variables reporting a meta-analysis with  $k = 2$ , imputing  $SD_r$  from the largest- $k$  meta-analysis had sizable stabilizing effects on second-order parameters. Overall, population correlations more closely resembled the more reliable meta-analyses; absolute differences between imputed versus observed  $SD_r$  correlations ranged from nil to appreciable ( $|\bar{\rho}| = .01$  to  $.13$ ;  $|\bar{\rho}_M| = .06$ ). What is more, the average estimated population variance was reduced by half ( $VAR_{True} = .0031$  vs  $.0015$ ), and the average corresponding percentage of variance attributable to second-order sampling error increased from 38% to 70%. Taken together, results indicate that imputing  $SD_r$  from the largest- $k$  meta-analysis mitigated the biasing effect of first-order sampling error on small- $k$  meta-analyses.

**Outlier meta-analyses.** Outlier meta-analyses can also influence results of second-order

meta-analysis. Concerning C and occupational performance across occupations, one first-order meta-analytic effect for Skilled/Semi-Skilled occupations is appreciably larger than those of other meta-analyses, and one first-order meta-analytic variance for Sales is appreciably smaller than those of other meta-analyses (see Table S15). To reduce the influence of these outliers, for the former, we imputed the observed  $SD_r$  from the meta-analysis with the largest variance as a counterbalance; for the latter, we imputed the observed  $SD_r$  from the meta-analysis with the largest  $k$ , similar to the previous small- $k$  procedures. Additionally, we re-ran analyses without outlier meta-analyses and compared results of all three analyses (see Table S19).

Table S19 presents results of sensitivity analyses for outlier meta-analyses. For Skill/Semi-Skilled occupations, results show that when compared to the observed, unadjusted estimate ( $\bar{\rho} = .24$ ,  $SD_{\rho} = .11$ ), imputing  $SD_r$  from the meta-analysis with the largest  $SD_r$  ( $\bar{\rho} = .21$ ,  $SD_{\rho} = .09$ ) and omitting the outlier ( $\bar{\rho} = .16$ ,  $SD_{\rho} = .00$ ) impacted second-order estimates. Likewise, for Sales occupations, results show that when compared to the observed, unadjusted estimate ( $\bar{\rho} = .15$ ,  $SD_{\rho} = .05$ ), imputing  $SD_r$  from the meta-analysis with the largest  $k$  ( $\bar{\rho} = .23$ ,  $SD_{\rho} = .05$ ) and omitting the outlier ( $\bar{\rho} = .24$ ,  $SD_{\rho} = .05$ ) also influenced parameter estimates. Because we had no substantive theoretical reason to exclude outlier meta-analyses, we elected to retain them and use the conservative approach of running second-order meta-analyses with respective imputed  $SD_r$ s.

***Alternative meta-analyses.*** For variables reporting multiple, independent meta-analyses, effects were combined by second-order meta-analysis. However, for several variables, multiple meta-analyses were candidates for second-order cumulation. In these instances, we selected the newest and/or most comprehensive meta-analysis for inclusion in second-order meta-analysis. Nevertheless, these excluded meta-analyses may also be useful for testing the robustness of our reported results. Thus, as an additional set of sensitivity analyses, we exchanged qualifying meta-

analyses with an alternative meta-analysis for eight applicable variables, where this was possible. We then compared reported second-order meta-analyses to alternative results (see Table S20).

Table S20 presents results of sensitivity analyses for alternative meta-analyses. For eight applicable variables, results show second-order parameter estimates based on alternative meta-analyses differed minimally from reported values; absolute differences between correlations ranged from  $|\bar{\rho}| = .01$  to  $.04$  ( $M = .02$ ). Further, for six of eight variables, 80% CIs overlapped, indicating no significant differences between them. For the remaining two variables, differences were minimal (respective  $|\bar{\rho}| = .03$ ). Altogether, results of sensitivity analyses indicate that second-order population parameters based on alternative meta-analyses differed marginally from our reported values that are based on newer and/or more comprehensive meta-analyses.

**Overall conclusions regarding publication bias and sensitivity analyses.** “A practical concern in meta-analysis is that the studies being cumulated may not be representative of all the studies conducted examining that relationship . . . The meta-analyst is then required to judge whether conclusions of the meta-analysis are likely to be reversed if all the data were available” (37 p. 555-556). Publication bias and questionable research practices can unduly influence meta-analyses. However, our quantitative evaluation of approaches to assessing publication bias and sensitivity analyses for first-order and second-order meta-analyses provide little evidence of publication bias for occupational relations to C reported in our review.

This finding is in line with other published evidence in the industrial-organizational psychological literature, which found “consistent empirical evidence that the file drawer problem does not produce an inflation bias and does not pose a serious threat to the validity of meta-analytically derived conclusions” (38, p. 222; see also 23). Further, reviewers’ conclusion that “it appears that publication bias is not a major threat in the micro-oriented management literature”

(39, p. 77) also appears to be applicable to meta-analyses in our review. In the final analysis, we conclude that results represent accurate estimates of the effects of C for occupational variables.

### **Supplemental Results**

The summary of meta-analyses of C and occupational variables depicted in Fig. 1 of the manuscript is presented in Table S3. Table S3 summarizes the findings across our organizing framework of five conceptual categories, each of which is subdivided by four career domains.

The following five tables present meta-analyses of C to specific occupational variables for each conceptual category. Variables in the top 33% of effect sizes are presented in grayscale in these tables. Specifically, Motivations, Values, and Interests (Table S4), Interpersonal (Table S5), Attitudes and Well-Being (Table S6), Counterproductivity (Table S7), and Performance (Table S8).

Meta-analyses of C for occupational performance across occupations, which are depicted in Fig. 2 of the manuscript, are presented in Table S9. Occupations were organized from least to most complex, based on grand mean DOT occupational complexity ratings that appear in the final column of Table S2.

Results of second-order meta-analyses are presented for 47 applicable variables. Specifically, Motivations, Values, and Interests (Table S10), Interpersonal (Table S11), Attitudes and Well-Being (Table S12), Counterproductivity (Table S13), and Performance (Table S14). Second-order meta-analyses for all eight available occupations are then presented in Table S15.

Results of evaluations of publication bias and sensitivity analyses are presented for first-order meta-analyses (Tables S16 and S17) and second-order meta-analyses (Tables S18-S20).

**Table S1**  
**Descriptions and Meta-Analytic Sources of Occupational Variables**

| Variable                                  | Rating Source/Description                                                                                                                                                   | Meta-Analytic Source(s)                      |
|-------------------------------------------|-----------------------------------------------------------------------------------------------------------------------------------------------------------------------------|----------------------------------------------|
| <b>Motivations, Values, and Interests</b> |                                                                                                                                                                             |                                              |
| <i>Education</i>                          |                                                                                                                                                                             |                                              |
| Goal orientation                          |                                                                                                                                                                             |                                              |
| Learning                                  | Self-reported measures of a goal orientation to seek opportunities to learn and grow in performance settings.                                                               | Payne et al. (2007)                          |
| Performance avoidance                     | Self-reported measures of a goal orientation to avoid disapproval and negative judgments about one's competence in performance settings.                                    | Payne et al. (2007)                          |
| Performance prove                         | Self-reported measures of a goal orientation to prove one's competence and gain favorable judgments in performance settings.                                                | Payne et al. (2007)                          |
| Academic self-efficacy                    | Self-reported measures of motivation to perform academically based on one's perceived self-efficacy.                                                                        | Stajkovic et al. (2018)                      |
| Academic procrastination                  | Self-reported measures of postponing, delaying, or putting off academic tasks or responsibilities.                                                                          | van Eerde (2004)                             |
| <i>Job Application</i>                    |                                                                                                                                                                             |                                              |
| Job search self-regulation                | Self-reported measures of attitudes and behaviors directed at exploring and clarifying job search goals, as well as planning and self-regulating actions to implement them. | van Hooft et al. (2015)                      |
| Applicant reactions: Test motivation      | Self-reported measures of applicants' motivation to take selection tests administered as part of a hiring process.                                                          | Hausknecht et al. (2004)                     |
| Assessment center dimension: Drive        | AC-rated measures of assessee's high level of activity, high performance standards, persistence in achievement, and expressed desire to advance to higher job levels.       | Dilchert & Ones (2009); Meriac et al. (2008) |
| <i>On the Job</i>                         |                                                                                                                                                                             |                                              |
| Regulatory focus                          |                                                                                                                                                                             |                                              |
| Prevention                                | Self-reported measures of sensitivity to and self-regulation around positive stimuli or goals at work.                                                                      | Lanaj et al. (2012)                          |

| Variable                   | Rating Source/Description                                                                                                      | Meta-Analytic Source(s)      |
|----------------------------|--------------------------------------------------------------------------------------------------------------------------------|------------------------------|
| Promotion                  | Self-reported measures of sensitivity to and self-regulation around negative stimuli or goals at work.                         | Lanaj et al. (2012)          |
| Psychological needs        |                                                                                                                                |                              |
| Autonomy                   | Self-reported measures of a need to act with behavioral ownership and feel psychologically free at work.                       | van den Broeck et al. (2016) |
| Competence                 | Self-reported measures of a need for a sense of mastery over the environment and to develop new skills at work.                | van den Broeck et al. (2016) |
| Relatedness                | Self-reported measures of a need to love and feel connected to others at work.                                                 | van den Broeck et al. (2016) |
| Performance motivation     |                                                                                                                                |                              |
| Expectancy                 | Self-reported measures of motivation to perform a task based on expectations that performance will result in desired outcomes. | Judge & Ilies (2002)         |
| Goal-setting               | Self-reported measures of motivation to perform a task based on the level and/or difficulty of its goals.                      | Judge & Ilies (2002)         |
| Self-efficacy              | Self-reported measures of motivation to perform a task based on one's perceived self-efficacy.                                 | Judge & Ilies (2002)         |
| Demonstrating effort       | Other-rated measures of hard work, extra effort, and willingness to work long hours under adverse conditions.                  | Rojon et al. (2015)          |
| Employee engagement        |                                                                                                                                |                              |
| Overall                    | Self-reported measures of attitudes about the investment of energies in the experience or performance of work.                 | Young et al. (2018)          |
| Absorption                 | Self-reported measures of absorption in work activities.                                                                       | Young et al. (2018)          |
| Dedication                 | Self-reported measures of dedication to high work performance.                                                                 | Young et al. (2018)          |
| Vigor                      | Self-reported measures of vigor in carrying out work activities.                                                               | Young et al. (2018)          |
| <b>Career/Lifespan</b>     |                                                                                                                                |                              |
| Entrepreneurial intentions | Self-reported measures of expressed behavioral intention to become an entrepreneur.                                            | Zhao et al. (2010)           |
| Procrastination            | Self-reported measures of postponing, delaying, or putting off tasks or decisions.                                             | Steel (2007)                 |
| Workaholism                | Self-reported measures of an addiction to work.                                                                                | Clark et al. (2016)          |
| Personal values            |                                                                                                                                |                              |
| Self-enhancement           | Self-reported measures of meta-values of self-interest, success, and dominance over others and resources.                      | Parks-Leduc et al. (2015)    |
| Achievement                | Self-reported measures of values of personal success and demonstrating competence.                                             | Parks-Leduc et al. (2015)    |

| Variable             | Rating Source/Description                                                                                                | Meta-Analytic Source(s)                   |
|----------------------|--------------------------------------------------------------------------------------------------------------------------|-------------------------------------------|
| Hedonism             | Self-reported measures of values of pleasure and self-gratification.                                                     | Parks-Leduc et al. (2015)                 |
| Power                | Self-reported measures of values of social status, dominance, and control over people and resources.                     | Parks-Leduc et al. (2015)                 |
| Self-transcendence   | Self-reported measures of meta-values of concern for the interests and welfare of others.                                | Parks-Leduc et al. (2015)                 |
| Benevolence          | Self-reported measures of values of preservation and enhancement of the welfare of in-group members.                     | Parks-Leduc et al. (2015)                 |
| Universalism         | Self-reported measures of tolerance, concern, and appreciation for the welfare of humankind and nature.                  | Parks-Leduc et al. (2015)                 |
| Openness to change   | Self-reported measures of meta-values of independence of thought, action, feelings, and a readiness for change.          | Parks-Leduc et al. (2015)                 |
| Self-direction       | Self-reported measures of values of autonomy of thought, action.                                                         | Parks-Leduc et al. (2015)                 |
| Stimulation          | Self-reported measures of values of excitement, novelty, and challenge in life.                                          | Parks-Leduc et al. (2015)                 |
| Conservation         | Self-reported measures of meta-values of order, self-restriction, preservation of the past, and resistance to change.    | Parks-Leduc et al. (2015)                 |
| Conformity           | Self-reported measures of values of behavioral restraint likely to upset or harm others and violate social expectations. | Parks-Leduc et al. (2015)                 |
| Security             | Self-reported measures of values of personal and social security.                                                        | Parks-Leduc et al. (2015)                 |
| Tradition            | Self-reported measures of values of maintaining cultural and religious traditions and customs.                           | Parks-Leduc et al. (2015)                 |
| Vocational interests |                                                                                                                          |                                           |
| Realistic            | Self-reported measures of career interests in activities involving manipulating machines, tools, or animals.             | Mount et al. (2005); Staggs et al. (2007) |
| Investigative        | Self-reported measures of career interests in activities involving thinking, analysis, and research.                     | Mount et al. (2005); Staggs et al. (2007) |
| Artistic             | Self-reported measures of career interests in activities involving artistic creation.                                    | Mount et al. (2005); Staggs et al. (2007) |
| Social               | Self-reported measures of career interests in activities involving working with and helping others.                      | Mount et al. (2005); Staggs et al. (2007) |
| Enterprising         | Self-reported measures of career interests in activities involving leading, influencing, or persuading others.           | Mount et al. (2005); Staggs et al. (2007) |
| Conventional         | Self-reported measures of career interests in activities involving manipulating data, records, or systems.               | Mount et al. (2005); Staggs et al. (2007) |

| Variable                      | Rating Source/Description                                                                                                                                                                  | Meta-Analytic Source(s)                         |
|-------------------------------|--------------------------------------------------------------------------------------------------------------------------------------------------------------------------------------------|-------------------------------------------------|
| <b>Interpersonal</b>          |                                                                                                                                                                                            |                                                 |
| <b><i>Job Application</i></b> |                                                                                                                                                                                            |                                                 |
| Employment interview          |                                                                                                                                                                                            |                                                 |
| Conventional/Low structure    | Interviewer-rated measures of applicant performance in conventional or unstructured employment interviews.                                                                                 | Salgado & Moscoso (2002)                        |
| Behavioral/High structure     | Interviewer-rated measures of applicant performance in behavioral or structured employment interviews.                                                                                     | Salgado & Moscoso (2002);<br>Roth et al. (2005) |
| Negotiation performance       | Supervisor- and other-rated measures of negotiation performance in field or lab settings.                                                                                                  | Sharma et al. (2013)                            |
| Assessment center dimension   |                                                                                                                                                                                            |                                                 |
| Communication                 | AC-rated measures of assessee's conveyance of oral and written information, responding to questions and challenges.                                                                        | Dilchert & Ones (2009); Meriac et al. (2008)    |
| Consideration of others       | AC-rated measures of assessee's consideration of others' feelings, needs, and awareness of implications of decisions for stakeholders                                                      | Dilchert & Ones (2009); Meriac et al. (2008)    |
| Influencing others            | AC-rated measures of assessee's persuasion of others to act or adopt a viewpoint that produces desired results, as well as actions stemming from convictions rather than others' opinions. | Dilchert & Ones (2009); Meriac et al. (2008)    |
| Assessment center exercise    |                                                                                                                                                                                            |                                                 |
| Leaderless group discussion   | AC-rated measures of assessee's performance in an unstructured group given a problem to resolve in a set period.                                                                           | Hoffman et al. (2015)                           |
| Oral presentation             | AC-rated measures of assessee's performance in a scenario describing a problem, preparing recommended solutions, and delivering them orally to a group of supervisors or peers.            | Hoffman et al. (2015)                           |
| Role-play                     | AC-rated measures of assessee's performance in a one-on-one conversation with a role-player resolving a given problem.                                                                     | Hoffman et al. (2015)                           |
| <b><i>On the Job</i></b>      |                                                                                                                                                                                            |                                                 |
| Social network roles          |                                                                                                                                                                                            |                                                 |
| Expressive: Brokerage         | Sociometric measures of the number of social holes filled in expressive (i.e., socio-emotional) social networks.                                                                           | Fang et al. (2015)                              |
| Expressive: Indegree          | Sociometric measures of the number of ties received from others in expressive (i.e., socio-emotional) social networks.                                                                     | Fang et al. (2015)                              |
| Instrumental: Brokerage       | Sociometric measures of the number of social holes filled in instrumental social networks.                                                                                                 | Fang et al. (2015)                              |
| Instrumental: Indegree        | Sociometric measures of the number of ties received from others in instrumental social networks.                                                                                           | Fang et al. (2015)                              |



| Variable                           | Rating Source/Description                                                                                                                                                              | Meta-Analytic Source(s)                                         |
|------------------------------------|----------------------------------------------------------------------------------------------------------------------------------------------------------------------------------------|-----------------------------------------------------------------|
| “Getting along” performance        | Supervisor-rated measures of criteria associated with getting along with others (e.g., showing interpersonal skill, sharing credit).                                                   | Hogan & Holland (2003)                                          |
| Interpersonal citizenship behavior | Other-rated measures of behaviors aimed at maintaining and enhancing the organization, mainly directed at other individuals.                                                           | Chiaburu et al. (2011)                                          |
| <i>Career/Lifespan</i>             |                                                                                                                                                                                        |                                                                 |
| Interpersonal sensitivity          | Observer-rated measures of accurate judgment about or recall of others’ behaviors or appearance.                                                                                       | Hall et al. (2009)                                              |
| Leadership                         |                                                                                                                                                                                        |                                                                 |
| Overall                            | A mix of leadership emergence and effectiveness.                                                                                                                                       | DeRue et al. (2011)                                             |
| Emergence                          | Self-reported measures of leadership position occupation, other-rated rankings or nominations in leaderless groups, sociometric ratings, or participation in leadership activities.    | Judge et al. (2002a)                                            |
| Effectiveness                      | Other-rated measures of subordinates’ and supervisors’ ratings of leadership effectiveness.                                                                                            | Judge et al. (2002a)                                            |
| Group performance                  | Outcomes of group productivity (e.g., units produced).                                                                                                                                 | DeRue et al. (2011)                                             |
| Transformational leadership        |                                                                                                                                                                                        |                                                                 |
| Overall                            | Other-rated measures of behaviors involving meaningful leadership exchanges that produce vision-driven change.                                                                         | Bono & Judge (2002); Deinert et al. (2015)                      |
| Charisma                           | A combination of other-rated idealized influence (e.g., identification with a leader’s vision) and inspirational motivation (e.g., fostering optimism via verbal and symbolic action). | Banks et al. (2017); Bono & Judge (2002)                        |
| Individualized consideration       | Other-rated measures of behaviors providing followers with opportunities for growth and development, coaching, and personalized consulting.                                            | Bono & Judge (2002); Deinert et al. (2015); DeRue et al. (2011) |
| Intellectual stimulation           | Other-rated measures of behaviors exhorting followers to reframe problems, develop novel ideas, or approach issues in new ways.                                                        | Bono & Judge (2002); Deinert et al. (2015); DeRue et al. (2011) |
| Transactional leadership           |                                                                                                                                                                                        |                                                                 |
| Contingent reward                  | Other-rated measures of behaviors aimed at monitoring and controlling employees through rational or economic means.                                                                    | Bono & Judge (2002)                                             |
| Management by exception            | Other-rated measures of behaviors focused on exchanges of tangible or nontangible support and resources to followers based on their efforts and performance.                           | Bono & Judge (2002)                                             |
|                                    | Other-rated measures of behaviors involving setting performance standards and monitoring deviations, acting on an as-needed basis.                                                     | Bono & Judge (2002)                                             |

| Variable                                      | Rating Source/Description                                                                                                      | Meta-Analytic Source(s)                      |
|-----------------------------------------------|--------------------------------------------------------------------------------------------------------------------------------|----------------------------------------------|
| Passive leadership                            | Other-rated measures of behaviors involving passive leadership and intervening only when problems become serious.              | Bono & Judge (2002)                          |
| <b>Attitudes and Well-Being</b>               |                                                                                                                                |                                              |
| <b>Education</b>                              |                                                                                                                                |                                              |
| Adjustment to college                         |                                                                                                                                |                                              |
| Overall                                       | Self-reported measures of the degree to which one has adapted to college in general.                                           | Credé & Niehorster (2012)                    |
| Academic                                      | Self-reported measures of the degree to which one has adapted to the academic demands of college.                              | Credé & Niehorster (2012)                    |
| Social                                        | Self-reported measures of the degree to which one has integrated themselves into the social environment of college.            | Credé & Niehorster (2012)                    |
| Personal-emotional                            | Self-reported measures of the degree to which one experiences stress, anxiety, and/or physical reactions to college demands.   | Credé & Niehorster (2012)                    |
| Institutional attachment                      | Self-reported measures of the degree to which one identifies with and has become emotionally attached to university community. | Credé & Niehorster (2012)                    |
| Study attitudes                               | Self-reported measures of a positive attitude toward studying.                                                                 | Credé & Kuncel (2008)                        |
| Career decision-making difficulties           | Self-reported measures of cognitive and affective difficulties in making career-related decisions.                             | Martincin & Stead (2015)                     |
| <b>Job Application</b>                        |                                                                                                                                |                                              |
| Applicant attraction to organizations         | Self-reported measures of attitudinal attraction towards a prospective employer (i.e., applicant attraction).                  | Swider et al. (2015)                         |
| Applicant reactions: Procedural justice       | Self-reported measures of applicants' attitudes, affect, or cognitions about the procedural justice of a hiring process.       | Hausknecht et al. (2004)                     |
| Assessment center dimension: Stress tolerance | AC-rated measures of assessee's effectiveness in diverse or novel situations under pressure, opposition, and disappointment.   | Dilchert & Ones (2009); Meriac et al. (2008) |
| <b>On the Job</b>                             |                                                                                                                                |                                              |
| Job satisfaction                              | Self-reported measures of overall job satisfaction.                                                                            | Judge et al. (2002b); Seltzer et al. (2017)  |
| Organizational commitment                     |                                                                                                                                |                                              |
| Global                                        | Self-reported measures of overall attachment to an organization.                                                               | Choi et al. (2015)                           |
| Affective                                     | Self-reported measures of emotional attachment to an organization.                                                             | Choi et al. (2015)                           |
| Continuance                                   | Self-reported measures of the evaluation of costs and benefits associated with leaving an organization.                        | Choi et al. (2015)                           |

| Variable                         | Rating Source/Description                                                                                                            | Meta-Analytic Source(s)                      |
|----------------------------------|--------------------------------------------------------------------------------------------------------------------------------------|----------------------------------------------|
| Normative                        | Self-reported measures of felt obligation to remain with an organization.                                                            | Choi et al. (2015)                           |
| Turnover intentions              | Self-reported measures of intention to turnover from an employer.                                                                    | Harari et al. (2018); Zimmerman (2008)       |
| Work-life balance                |                                                                                                                                      |                                              |
| Family interference with work    | Self-reported measures of the degree to which family role participation interferes with work role responsibilities.                  | Allen et al. (2012)                          |
| Work interference with family    | Self-reported measures of the degree to which work role participation interferes with family role responsibilities.                  | Allen et al. (2012)                          |
| Work-nonwork spillover: Negative | Self-reported measures of the degree to which work (nonwork) role participation is worsened by participating in the other role.      | Michel et al. (2011)                         |
| Work-nonwork spillover: Positive | Self-reported measures of the degree to which work (nonwork) role participation is improved by participating in the other role.      | Michel et al. (2011)                         |
| Expatriate adjustment            |                                                                                                                                      |                                              |
| Overall                          | Self-reported measures of the degree to which one has adapted to expatriate life overall.                                            | Harari et al. (2018)                         |
| General                          | Self-reported measures of the degree to which one has adapted to everyday life experiences in the new culture (e.g., food, weather). | Harari et al. (2018)                         |
| Interactional                    | Self-reported measures of the degree to which one has adapted to interacting with host-nationals.                                    | Harari et al. (2018)                         |
| Work                             | Self-reported measures of the degree to which one has adapted to foreign work roles.                                                 | Harari et al. (2018)                         |
| Burnout                          |                                                                                                                                      |                                              |
| Emotional exhaustion             | Self-reported measures of low energy, negative affect, and perceptions of depleted emotional resources due to work stress.           | Swider & Zimmerman (2010); You et al. (2015) |
| Depersonalization                | Self-reported measures of attempts to cope with work stress by distancing from others through callous or uncaring responses.         | Swider & Zimmerman (2010); You et al. (2015) |
| Personal accomplishment          | Self-reported measures of self-evaluative feelings of competence and achievement at work.                                            | Swider & Zimmerman (2010); You et al. (2015) |
| Leader-member exchange           | Self-reported measures of the quality of exchange relationship with a manager or supervisor.                                         | Dulebohn et al. (2012)                       |
| Abusive supervision perceptions  | Self-reported measures of supervisor engagement in hostile verbal and nonverbal (e.g., physical) behaviors.                          | Mackey et al. (2017)                         |
| Workplace harassment perceptions | Self-reported measures of coworker engagement in bullying, victimization, and other hostile behaviors.                               | Nielsen et al. (2017)                        |

| Variable                               | Rating Source/Description                                                                                                                                             | Meta-Analytic Source(s)                                        |
|----------------------------------------|-----------------------------------------------------------------------------------------------------------------------------------------------------------------------|----------------------------------------------------------------|
| <b>Justice perceptions</b>             |                                                                                                                                                                       |                                                                |
| Distributive                           | Self-reported measures of fairness about the outcome one receives.                                                                                                    | Huang et al. (2017)                                            |
| Informational                          | Self-reported measures of the extent to which interpersonal communication is candid, thorough, and timely.                                                            | Huang et al. (2017)                                            |
| Interpersonal                          | Self-reported measures of the extent to which one is treated with politeness, sensitivity, and dignity.                                                               | Huang et al. (2017)                                            |
| Procedural                             | Self-reported measures of fairness about the decision process.                                                                                                        | Huang et al. (2017)                                            |
| Safety climate                         | Self-reported measures of perceptions of an organizational climate for safe behavior.                                                                                 | Beus et al. (2015)                                             |
| <b>Career/Lifespan</b>                 |                                                                                                                                                                       |                                                                |
| Career adaptability                    | Self-reported measures of preparation for, control over, curiosity about, and self-efficacy about one's career opportunities.                                         | Rudolph et al. (2017)                                          |
| Career satisfaction                    | Self-reported measures of satisfaction with one's career.                                                                                                             | Ng & Feldman (2014b)                                           |
| Happiness                              | Self-reported measures of happiness.                                                                                                                                  | Steel et al. (2008)                                            |
| Life satisfaction                      | Self-reported measures of satisfaction with life.                                                                                                                     | Seltzer et al. (2017); Steel et al. (2008)                     |
| Quality of life                        | Self-reported measures of satisfaction with quality of life.                                                                                                          | Steel et al. (2008)                                            |
| <b>Counterproductivity</b>             |                                                                                                                                                                       |                                                                |
| <b>Education</b>                       |                                                                                                                                                                       |                                                                |
| Academic dishonesty                    | Self-reported measures of cheating, plagiarism, or unauthorized help in academic settings.                                                                            | Giluk & Postlethwaite (2015)                                   |
| <b>Job Application</b>                 |                                                                                                                                                                       |                                                                |
| Applicant faking                       | Self-reported measures of applicant versus incumbent personality.                                                                                                     | Birkeland et al. (2006)                                        |
| <b>On the Job</b>                      |                                                                                                                                                                       |                                                                |
| Safety performance                     | Self-reported measures of using safety equipment, showing regard for safety procedures, and following workplace safety programs.                                      | Beus et al. (2015)                                             |
| Irresponsible behavior                 | Other-rated and objective measures of poor attendance, disciplinary actions, counterproductive behavior, failure to follow directions, absenteeism, or substance use. | Hough (1992)                                                   |
| <b>Counterproductive work behavior</b> |                                                                                                                                                                       |                                                                |
| Overall                                | Self-reported and objective measures of deviant behaviors at work (e.g., theft, disciplinary issues, property damage, rule breaking).                                 | Carpenter & Berry (2017); Darr (2011); van Aarde et al. (2017) |
| Other-ratings                          | Other-rated measures of deviant behaviors at work (e.g., theft, disciplinary issues, substance abuse, property damage).                                               | Berry et al. (2012)                                            |

| Variable               | Rating Source/Description                                                                                                                                                                     | Meta-Analytic Source(s)                    |
|------------------------|-----------------------------------------------------------------------------------------------------------------------------------------------------------------------------------------------|--------------------------------------------|
| Interpersonal          | Self-reported and objective measures of deviant behaviors targeted at other individuals (e.g., violence, gossip, theft from coworkers).                                                       | Berry et al. (2007)                        |
| Organizational         | Self-reported measures of deviant behaviors targeted at the organization (e.g., working slowly, damaging property).                                                                           | Berry et al. (2007)                        |
| Cyberloafing           | Self-reported measures of using technology to idle instead of work.                                                                                                                           | Mercado et al. (2017)                      |
| Withdrawal behavior    | Self-reported and other-rated measures of avoidance of or disengagement from work environment, tasks, or the organization.                                                                    | Carpenter & Berry (2017)                   |
| Absenteeism            | Self-reported measures of absence from or lateness to work.                                                                                                                                   | Li et al. (2014)                           |
| <b>Career/Lifespan</b> |                                                                                                                                                                                               |                                            |
| Turnover               |                                                                                                                                                                                               |                                            |
| Turnover/tenure        | Objective measures of voluntary quitting, discharges, or length of times employee have been with an organization (reverse-keyed).                                                             | Barrick & Mount (1991)                     |
| Turnover               | Objective measures of voluntary quitting and discharge.                                                                                                                                       | Zimmerman (2008)                           |
| Voluntary turnover     | Objective measures of voluntary quitting.                                                                                                                                                     | Rubenstein et al. (2018)                   |
| Antisocial behavior    | Self-reported, other-rated, and objective measures or clinical interviews assessing criminal and antisocial behavior (e.g., stealing, stalking, bullying), delinquency, and conduct disorder. | Jones et al. (2011); Miller & Lyman (2001) |
| Aggression             | Self-reported, other-rated, and objective measures or clinical interviews assessing physical aggression or violence.                                                                          | Jones et al. (2011)                        |
| Accidents              |                                                                                                                                                                                               |                                            |
| Occupational           | Self-reported and objective measures assessing safety incidents resulting in worker injury or property damage at work.                                                                        | Beus et al. (2015)                         |
| Vehicular              | Self-reported and objective measures assessing vehicular accidents or injuries taking place in traffic.                                                                                       | af Wählberg et al. (2017)                  |
| <b>Performance</b>     |                                                                                                                                                                                               |                                            |
| <b>Education</b>       |                                                                                                                                                                                               |                                            |
| Study habits           | Self-reported measures of regular engagement in sound study behaviors and routines.                                                                                                           | Credé & Kuncel (2008)                      |
| Academic attendance    | Self-reported measures of postsecondary class attendance.                                                                                                                                     | Credé et al. (2010)                        |
| Academic performance   | Self-reported and objective measures of primary, secondary, or postsecondary grades or grade point average.                                                                                   | Poropat (2009)                             |

| Variable                               | Rating Source/Description                                                                                                                                                                                                                              | Meta-Analytic Source(s)                                                                                                                                          |
|----------------------------------------|--------------------------------------------------------------------------------------------------------------------------------------------------------------------------------------------------------------------------------------------------------|------------------------------------------------------------------------------------------------------------------------------------------------------------------|
| Academic performance:<br>Postsecondary | Self-reported and objective measures of postsecondary grades or grade point average.                                                                                                                                                                   | McAbee & Oswald (2013);<br>Salgado & Táuriz (2014);<br>Stajkovic et al. (2018); van<br>Aarde et al. (2017)                                                       |
| Academic success                       | Self-reported and objective measures of secondary or<br>postsecondary grades or grade point average, and attendance.                                                                                                                                   | Hough (1992)                                                                                                                                                     |
| Educational attainment                 | Self-reported and objective measures of educational attainment.                                                                                                                                                                                        | Ng & Feldman (2010)<br>Barrick & Mount (1991); Darr<br>(2011); Hurtz & Donovan<br>(2000); Salgado (1997); Salgado<br>& Táuriz (2014); van Aarde et<br>al. (2017) |
| Training performance                   | Supervisor-rated measures of training performance.                                                                                                                                                                                                     |                                                                                                                                                                  |
| Training success                       | Self-reported, other-rated, and objective measures of knowledge<br>or skill acquired and applied to different settings, people, or<br>situations, and changes from learning that persist over time, test<br>scores, or measures of completed training. | Blume et al. (2010); Hough<br>(1992)                                                                                                                             |
| <b><i>Job Application</i></b>          |                                                                                                                                                                                                                                                        |                                                                                                                                                                  |
| Situational judgment tests             |                                                                                                                                                                                                                                                        |                                                                                                                                                                  |
| Knowledge                              | Self-reported measures of applicants' evaluations of the<br>effectiveness of possible responses to work-related situations.                                                                                                                            | McDaniel et al. (2007)                                                                                                                                           |
| Behavioral tendency                    | Self-reported measures of applicants' likely behavioral responses<br>to given work-related situations.                                                                                                                                                 | McDaniel et al. (2007)                                                                                                                                           |
| Job search success                     |                                                                                                                                                                                                                                                        |                                                                                                                                                                  |
| Job search intensity                   | Self-reported measures of the frequency and scope of job search<br>behaviors, and resources devoted toward that search.                                                                                                                                | van Hooft et al. (2015)                                                                                                                                          |
| Employment status                      | Self-reported measure of whether a job seeker had found a new<br>job or not after a given period.                                                                                                                                                      | van Hooft et al. (2015)                                                                                                                                          |
| Employment quality                     | Self-reported and objective measures of extrinsic factors and<br>subjective attitudes about a new job vis-à-vis a prior position.                                                                                                                      | van Hooft et al. (2015)                                                                                                                                          |
| Assessment center dimension            |                                                                                                                                                                                                                                                        |                                                                                                                                                                  |
| Organizing and planning                | AC-rated measures of assessee's systematic arrangement of work<br>and resources, and that of others, for task achievement, as well as<br>anticipation of and preparation for the future.                                                               | Dilchert & Ones (2009); Meriac<br>et al. (2008)                                                                                                                  |

| Variable                     | Rating Source/Description                                                                                                                                                                     | Meta-Analytic Source(s)                                                                                                                                       |
|------------------------------|-----------------------------------------------------------------------------------------------------------------------------------------------------------------------------------------------|---------------------------------------------------------------------------------------------------------------------------------------------------------------|
| Problem solving              | AC-rated measures of assessee's information gathering and analysis of technical information, selection of actions, use of resources in new ways, and generation and recognition of solutions. | Dilchert & Ones (2009); Meriac et al. (2008)                                                                                                                  |
| Assessment center exercise   |                                                                                                                                                                                               |                                                                                                                                                               |
| Case analysis                | AC-rated measures of assessee's performance in a given scenario describing a problem and preparing a set of recommended solutions to higher management in writing.                            | Hoffman et al. (2015)                                                                                                                                         |
| In-basket                    | AC-rated measures of assessee's performance in a scenario managing paperwork that arrives for the typical manager.                                                                            | Hoffman et al. (2015)                                                                                                                                         |
| <b><i>On the Job</i></b>     |                                                                                                                                                                                               |                                                                                                                                                               |
| Occupational performance     | Other-rated and objective measures of training or overall job performance, or outcomes of performance.                                                                                        | Barrick & Mount (1991); Hertz & Donovan (2000); Salgado (1997); Salgado & Táuriz (2014); van Aarde et al. (2017)                                              |
| Training and job performance | Supervisor-rated measures of training and overall job performance.                                                                                                                            | Barrick & Mount (1991)                                                                                                                                        |
| Overall job performance      |                                                                                                                                                                                               |                                                                                                                                                               |
| Supervisor-ratings           | Supervisor-rated measures of overall job performance.                                                                                                                                         | Darr (2011); Hogan & Holland (2003); Judge et al. (2013); Salgado & Táuriz (2014); Schmidt & Oh (2013); Shaffer & Postlewaite (2012); van Aarde et al. (2017) |
| Peer-ratings                 | Peer-rated measures of overall job performance.                                                                                                                                               | Conway et al. (2001)                                                                                                                                          |
| Subordinate-ratings          | Subordinate-rated measures of overall job performance.                                                                                                                                        | Conway et al. (2001)                                                                                                                                          |
| Self-ratings                 | Self-reported measures of overall job performance.                                                                                                                                            | Joseph et al. (2015)                                                                                                                                          |
| Maximal performance          | Supervisor-rated or objective measures of maximum performance levels in a work-related activity.                                                                                              | Beus & Whitman (2012)                                                                                                                                         |
| Typical performance          | Supervisor-rated or objective measures of typical performance levels in a work-related activity.                                                                                              | Beus & Whitman (2012)                                                                                                                                         |
| Technical performance        | Supervisor-rated measures of proficiency in performing activities formally recognized as part of the job, which contribute to the organization's technical core.                              | Hogan & Holland (2003); Judge et al. (2013); van Aarde et al. (2017)                                                                                          |

| Variable                            | Rating Source/Description                                                                                                                                                          | Meta-Analytic Source(s)                      |
|-------------------------------------|------------------------------------------------------------------------------------------------------------------------------------------------------------------------------------|----------------------------------------------|
| Contextual performance              | Other-rated measures of discretionary behaviors that in aggregate, promote effective organizational functioning.                                                                   | Judge et al. (2013); van Aarde et al. (2017) |
| Organizational citizenship behavior |                                                                                                                                                                                    |                                              |
| Overall                             | A combination of other-rated measures of interpersonal, organizational, and/or change-based citizenship behaviors.                                                                 | Chiaburu et al. (2011)                       |
| Global                              | Other-rated measures of behaviors aimed at maintaining and enhancing organizational context that supports task performance.                                                        | Chiaburu et al. (2011)                       |
| Organizational                      | Other-rated measures of behaviors aimed at maintaining and enhancing the organization, mainly directed at the organization.                                                        | Chiaburu et al. (2011)                       |
| Change                              | Other-rated measures of behaviors aimed at enhancing the organization by bringing about proactive and positive changes.                                                            | Chiaburu et al. (2011)                       |
| Voice                               |                                                                                                                                                                                    |                                              |
| Overall                             | Self-reported measures of discretionary expressions of organizationally relevant content intended to affect the work context and targeted at someone in the organization.          | Chamberlin et al. (2017)                     |
| Prohibitive                         | Self-reported measures of discretionary expressions of organizationally relevant content regarding problems and concerns that could lead to harmful outcomes for the organization. | Chamberlin et al. (2017)                     |
| Promotive                           | Self-reported measures of discretionary expressions of organizationally relevant content regarding opportunities and initiatives to improve future organizational functioning.     | Chamberlin et al. (2017)                     |
| Adaptive performance                | Other-rated measures of incumbent proficiency in altering their performance behavior in response to the demands of a new task, event, situation, or an environmental constraint.   | Huang et al. (2014)                          |
| Creativity                          | Other-rated and objective measures of product creation, idea innovation, divergent thinking, or number of patents.                                                                 | Hough (1992); Puryear et al. (2017)          |
| Performance rating leniency         | Self-reported measures of leniency in performance ratings.                                                                                                                         | Harari et al. (2015)                         |
| <b>Career/Lifespan</b>              |                                                                                                                                                                                    |                                              |
| Job complexity                      | Self-reported measures of the complexity of one's job.                                                                                                                             | Zimmerman (2008)                             |
| Job crafting                        | Self-reported measures of behaviors aimed at actively changing the perceived characteristics of one's job.                                                                         | Rudolph et al. (2017)                        |
| Organizational tenure               | Self-reported or objective measures of tenure with an organization.                                                                                                                | Ng & Feldman (2010)                          |
| Personnel data                      | Objective measures of level changes in job positions, salary, turnover/tenure, and productivity.                                                                                   | Barrick & Mount (1991); Salgado (1997)       |



| Variable             | Rating Source/Description                                                                                      | Meta-Analytic Source(s)                                                        |
|----------------------|----------------------------------------------------------------------------------------------------------------|--------------------------------------------------------------------------------|
| Commendable behavior | Objective measures of commendations, or absence of disciplinary actions, demotions, and involuntary discharge. | Hough (1992)                                                                   |
| Productivity         | Objective measures of productivity (e.g., units sold).                                                         | Barrick & Mount (1991);<br>Salgado & Táuriz (2014); van<br>Aarde et al. (2017) |
| Status change        | Objective measures of level changes in job positions.                                                          | Barrick & Mount (1991)                                                         |
| Promotions           | Objective measures of number of promotions received.                                                           | Ng & Feldman (2010)                                                            |
| Salary               | Objective measures of salary level or compensation.                                                            | Ng & Feldman (2014a)                                                           |

**Table S2****Summary of Occupations Included in C Meta-Analyses and Dictionary of Occupational Titles (DOT) Information**

| Meta-Analytic Source        | Occupation Included      | Dictionary of Occupational Titles (DOT) Information |                                |        |        |
|-----------------------------|--------------------------|-----------------------------------------------------|--------------------------------|--------|--------|
|                             |                          | Reference Occupational Title                        | Complexity Rating <sup>a</sup> |        |        |
|                             |                          |                                                     | Data                           | People | Things |
| <b>Skilled/Semi-Skilled</b> |                          |                                                     |                                |        |        |
| Barrick & Mount (1991)      | Clerical workers         | Clerk, General                                      | 5                              | 6      | 2      |
|                             | Nurses' aides            | Nurse Assistant                                     | 6                              | 7      | 4      |
|                             | Farmers                  | Farmer, General                                     | 1                              | 6      | 1      |
|                             | Flight attendants        | Airplane Flight Attendant                           | 3                              | 6      | 7      |
|                             | Medical assistants       | Medical Assistant                                   | 3                              | 6      | 2      |
|                             | Orderlies                | Orderly                                             | 6                              | 7      | 4      |
|                             | Airline baggage handlers | Baggage Handler                                     | 6                              | 8      | 7      |
|                             | Assemblers               | Assembler, Electrical Accessories I                 | 6                              | 8      | 7      |
|                             | Telephone operators      | Telephone Operator                                  | 6                              | 6      | 2      |
|                             | Grocery clerk            | Sales Clerk, Food                                   | 4                              | 7      | 7      |
|                             | Truck drivers            | Truck Driver, Heavy                                 | 6                              | 6      | 3      |
|                             | Production workers       | Assembler, Production                               | 6                              | 8      | 7      |
|                             | Hurtz & Donovan (2000)   | Skilled and semi-skilled                            | Laborer, General               | 6      | 8      |
| Salgado (1997): European    | Skilled labor            | Laborer, General                                    | 6                              | 8      | 6      |
| Salgado et al. (2015)       | Skilled manual           | Laborer, General                                    | 6                              | 8      | 6      |
|                             | Clerical workers         | Clerk, General                                      | 5                              | 6      | 2      |
| <b>Sales</b>                |                          |                                                     |                                |        |        |
| Barrick & Mount (1991)      | Sales                    | Sales Representative, General Merchandise           | 3                              | 5      | 7      |
| Hurtz & Donovan (2000)      | Sales                    | Sales Representative, General Merchandise           | 3                              | 5      | 7      |
| Salgado (1997): European    | Sales                    | Sales Representative, General Merchandise           | 3                              | 5      | 7      |
| Salgado et al. (2015)       | Sales                    | Sales Representative, General Merchandise           | 3                              | 5      | 7      |
| <b>Military</b>             |                          |                                                     |                                |        |        |
| Darr (2011)                 | Non-commissioned members | Infantry Operations Specialist                      | 3                              | 6      | 7      |
|                             | Officers                 | Infantry Unit Leader                                | 1                              | 3      | 7      |
| Hough (1992)                | Military                 | Infantry Operations Specialist                      | 3                              | 6      | 7      |
| Salgado et al. (2015)       | Military                 | Infantry Operations Specialist                      | 3                              | 6      | 7      |
| <b>Health Care</b>          |                          |                                                     |                                |        |        |
| Hough (1992)                | Health care workers      | Nurse, General Duty                                 | 3                              | 6      | 4      |

| Meta-Analytic Source     | Occupation Included       | Dictionary of Occupational Titles (DOT) Information |                                |        |        |
|--------------------------|---------------------------|-----------------------------------------------------|--------------------------------|--------|--------|
|                          |                           | Reference Occupational Title                        | Complexity Rating <sup>a</sup> |        |        |
|                          |                           |                                                     | Data                           | People | Things |
| Salgado et al. (2015)    | Health care workers       | Nurse, General Duty                                 | 3                              | 6      | 4      |
| <b>Customer Service</b>  |                           |                                                     |                                |        |        |
| Hurtz & Donovan (2000)   | Customer service          | Customer Service Representative                     | 3                              | 6      | 2      |
| Salgado et al. (2015)    | Customer service          | Customer Service Representative                     | 3                              | 6      | 2      |
| <b>Police</b>            |                           |                                                     |                                |        |        |
| Barrick & Mount (1991)   | Police                    | Police Officer I                                    | 2                              | 6      | 3      |
| Salgado (1997): European | Police                    | Police Officer I                                    | 2                              | 6      | 3      |
| Salgado et al. (2015)    | Police                    | Police Officer I                                    | 2                              | 6      | 3      |
| <b>Manager</b>           |                           |                                                     |                                |        |        |
| Barrick & Mount (1991)   | Foremen                   | Labor Crew Supervisor                               | 1                              | 3      | 1      |
|                          | Top executives            | Vice President                                      | 1                              | 1      | 7      |
| Hurtz & Donovan (2000)   | Managers                  | Manager, Industrial Organization                    | 1                              | 1      | 7      |
| Salgado (1997): European | Managers                  | Manager, Industrial Organization                    | 1                              | 1      | 7      |
| Salgado et al. (2015)    | Managers                  | Manager, Industrial Organization                    | 1                              | 1      | 7      |
|                          | Supervisors               | General Supervisor                                  | 1                              | 6      | 7      |
| <b>Professional</b>      |                           |                                                     |                                |        |        |
| Barrick & Mount (1991)   | Engineers                 | Electrical Engineer                                 | 0                              | 6      | 1      |
|                          | Architects                | Architect                                           | 0                              | 6      | 1      |
|                          | Attorneys                 | Lawyer                                              | 0                              | 1      | 7      |
|                          | Accountants               | Accountant                                          | 1                              | 6      | 2      |
|                          | Teachers                  | Teacher, Secondary School                           | 2                              | 2      | 7      |
|                          | Doctors                   | General Practitioner                                | 1                              | 0      | 1      |
|                          | Ministers                 | Clergy Member                                       | 1                              | 0      | 7      |
| Gnambs (2015)            | Computer programmers      | Computer Programmer                                 | 1                              | 6      | 2      |
| Klassen & Tze (2014)     | Teachers                  | Teacher, Secondary School                           | 2                              | 2      | 7      |
| Mol et al. (2005)        | Expatriates: Managers     | Manager, Industrial Organization                    | 1                              | 1      | 7      |
|                          | Expatriates: Missionaries | Clergy Member                                       | 1                              | 0      | 7      |
|                          | Expatriates: Technicians  | Electrical Engineer                                 | 0                              | 6      | 1      |
| Zhao et al. (2010)       | Entrepreneurs             | President                                           | 1                              | 1      | 7      |

*Note.* Reference Occupational Title, taken from the Dictionary of Occupational Titles (DOT; <https://www.occupationalinfo.org/>), is the closest approximation to the occupation reported in the source meta-analyses.

<sup>a</sup> Smaller ratings reflect greater occupational complexity across Data, People, and Things dimensions. The overall grand mean complexity rating across meta-analyses and dimensions was used to rank the eight occupations from least to most complex. These values are reported in Table S9.

Table S3

## Summary of Meta-Analyses of C and Occupational Variables

| Conceptual Category by Career Domain      | $n_{var}$  | $\bar{\rho}_M$ | $SD_p$     | $Min$       | $Qrt1$      | $Med$       | $Qrt3$      | $Max$      |
|-------------------------------------------|------------|----------------|------------|-------------|-------------|-------------|-------------|------------|
| <b>Overall</b>                            | <b>175</b> | <b>.20</b>     | <b>.13</b> | <b>-.25</b> | <b>.11</b>  | <b>.18</b>  | <b>.26</b>  | <b>.77</b> |
| <b>Motivations, Values, and Interests</b> | <b>44</b>  | <b>.22</b>     | <b>.17</b> | <b>.00</b>  | <b>.09</b>  | <b>.21</b>  | <b>.31</b>  | <b>.77</b> |
| Education                                 | 5          | .33            | .27        |             |             |             |             |            |
| Job Application                           | 3          | .23            | .05        |             |             |             |             |            |
| On the Job                                | 13         | .31            | .08        |             |             |             |             |            |
| Career/Lifespan                           | 23         | .15            | .16        |             |             |             |             |            |
| <b>Interpersonal</b>                      | <b>27</b>  | <b>.12</b>     | <b>.08</b> | <b>.02</b>  | <b>.06</b>  | <b>.10</b>  | <b>.17</b>  | <b>.32</b> |
| Education                                 | 0          | -              | -          |             |             |             |             |            |
| Job Application                           | 9          | .09            | .05        |             |             |             |             |            |
| On the Job                                | 6          | .13            | .07        |             |             |             |             |            |
| Career/Lifespan                           | 12         | .15            | .10        |             |             |             |             |            |
| <b>Attitudes and Well-Being</b>           | <b>40</b>  | <b>.23</b>     | <b>.13</b> | <b>-.13</b> | <b>.16</b>  | <b>.20</b>  | <b>.28</b>  | <b>.55</b> |
| Education                                 | 7          | .37            | .10        |             |             |             |             |            |
| Job Application                           | 3          | .14            | .04        |             |             |             |             |            |
| On the Job                                | 25         | .18            | .09        |             |             |             |             |            |
| Career/Lifespan                           | 5          | .34            | .16        |             |             |             |             |            |
| <b>Counterproductivity</b>                | <b>18</b>  | <b>-.20</b>    | <b>.14</b> | <b>-.42</b> | <b>-.25</b> | <b>-.22</b> | <b>-.17</b> | <b>.25</b> |
| Education                                 | 1          | -.22           | -          |             |             |             |             |            |
| Job Application                           | 1          | .25            | -          |             |             |             |             |            |
| On the Job                                | 9          | -.25           | .10        |             |             |             |             |            |
| Career/Lifespan                           | 7          | -.19           | .06        |             |             |             |             |            |
| <b>Performance</b>                        | <b>46</b>  | <b>.17</b>     | <b>.10</b> | <b>.00</b>  | <b>.10</b>  | <b>.16</b>  | <b>.24</b>  | <b>.47</b> |
| Education                                 | 8          | .25            | .07        |             |             |             |             |            |
| Job Application                           | 9          | .12            | .11        |             |             |             |             |            |
| On the Job                                | 20         | .17            | .07        |             |             |             |             |            |
| In-Role                                   | 9          | .20            | .09        |             |             |             |             |            |
| Extra-Role                                | 4          | .20            | .02        |             |             |             |             |            |
| Change-Oriented                           | 7          | .11            | .02        |             |             |             |             |            |
| Career/Lifespan                           | 9          | .16            | .13        |             |             |             |             |            |

Note.  $n_{var}$  = total number of variables per category,  $\bar{\rho}_M$  = mean estimated population correlation across variables,  $SD_p$  = between-variables standard deviation in population correlations,  $Min$  = minimum correlation,  $Qrt1$  = correlation at the first quartile (i.e., 25<sup>th</sup> percentile),  $Med$  = median correlation,  $Qrt3$  = correlation at the third quartile (i.e., 75<sup>th</sup> percentile),  $Max$  = maximum correlation. Variables with a negative valence (e.g., counterproductive work behavior) or a neutral valence (e.g., personal values) were rekeyed in a positive direction prior to calculating overall descriptive statistics.

**Table S4**  
**Meta-Analyses of C and Motivations, Interests, and Values Variables**

| Variable                             | <i>m</i> | <i>k</i> | <i>N</i> | $\bar{r}$ | <i>SD<sub>r</sub></i> | $\bar{\rho}$ | <i>SD<sub>ρ</sub></i> | 95% <i>CI</i> |      | 80% <i>CR</i> |      |  |
|--------------------------------------|----------|----------|----------|-----------|-----------------------|--------------|-----------------------|---------------|------|---------------|------|--|
|                                      |          |          |          |           |                       |              |                       | LO            | HI   | LO            | HI   |  |
| <b>Education</b>                     |          |          |          |           |                       |              |                       |               |      |               |      |  |
| Goal orientation                     |          |          |          |           |                       |              |                       |               |      |               |      |  |
| Learning                             | 1        | 12       | 3,066    | .26       | .06                   | <b>.33</b>   | .02                   | .23           | .30  | .30           | .35  |  |
| Performance avoidance                | 1        | 6        | 1,732    | -.14      | .06                   | <b>-.18</b>  | .00                   | -.19          | -.10 | -.18          | -.18 |  |
| Performance prove                    | 1        | 12       | 3,066    | .04       | .06                   | <b>.05</b>   | .00                   | .01           | .08  | .05           | .05  |  |
| Academic self-efficacy               | 1        | 5        | 875      | .25       | .08                   | <b>.32</b>   | .05                   | .18           | .32  | .26           | .38  |  |
| Academic procrastination             | 1        | 11       | 2,870    | -.65      | .04                   | <b>-.77</b>  | .02                   | -.67          | -.63 | -.79          | -.75 |  |
| <b>Job Application</b>               |          |          |          |           |                       |              |                       |               |      |               |      |  |
| Job search self-regulation           | 1        | 13       | 5,026    | .22       | .10                   | <b>.27</b>   | .10                   | .17           | .27  | .14           | .39  |  |
| Applicant reactions: Test motivation | 1        | 7        | 2,812    | .20       | .05                   | <b>.25</b>   | .02                   | .16           | .24  | .23           | .27  |  |
| Assessment center dimension: Drive   | 2        | 9        | 5,962    | .15       | .13                   | <b>.18</b>   | .06                   | .06           | .23  | .10           | .26  |  |
| <b>On the Job</b>                    |          |          |          |           |                       |              |                       |               |      |               |      |  |
| Regulatory focus                     |          |          |          |           |                       |              |                       |               |      |               |      |  |
| Prevention                           | 1        | 9        | 2,437    | .21       | .21                   | <b>.25</b>   | .24                   | .08           | .35  | -.05          | .56  |  |
| Promotion                            | 1        | 9        | 2,437    | .31       | .11                   | <b>.39</b>   | .11                   | .24           | .38  | .24           | .53  |  |
| Psychological needs                  |          |          |          |           |                       |              |                       |               |      |               |      |  |
| Autonomy                             | 1        | 6        | 1,588    | .25       | .14                   | <b>.33</b>   | .17                   | .14           | .37  | .11           | .55  |  |
| Competence                           | 1        | 6        | 1,588    | .38       | .09                   | <b>.47</b>   | .09                   | .31           | .45  | .36           | .58  |  |
| Relatedness                          | 1        | 6        | 1,588    | .29       | .16                   | <b>.37</b>   | .19                   | .16           | .42  | .12           | .61  |  |
| Performance motivation               |          |          |          |           |                       |              |                       |               |      |               |      |  |
| Expectancy                           | 1        | 11       | 1,487    | .16       | .11                   | <b>.22</b>   | .10                   | .10           | .22  | .10           | .35  |  |
| Goal-setting                         | 1        | 18       | 2,211    | .22       | .11                   | <b>.27</b>   | .08                   | .17           | .27  | .17           | .37  |  |
| Self-efficacy                        | 1        | 14       | 3,483    | .17       | .14                   | <b>.22</b>   | .16                   | .10           | .24  | .01           | .43  |  |
| Demonstrating effort                 | 1        | 10       | 12,236   | .15       | .09                   | <b>.23</b>   | .12                   | .10           | .20  | .07           | .38  |  |

| Variable                   | <i>m</i> | <i>k</i> | <i>N</i> | $\bar{r}$ | <i>SD<sub>r</sub></i> | $\bar{\rho}$ | <i>SD<sub>ρ</sub></i> | 95% <i>CI</i> |      | 80% <i>CR</i> |      |  |
|----------------------------|----------|----------|----------|-----------|-----------------------|--------------|-----------------------|---------------|------|---------------|------|--|
|                            |          |          |          |           |                       |              |                       | LO            | HI   | LO            | HI   |  |
| Employee engagement        |          |          |          |           |                       |              |                       |               |      |               |      |  |
| Overall                    | 1        | 57       | 25,424   | .30       | .11                   | <b>.36</b>   | .12                   | .27           | .33  | .21           | .51  |  |
| Absorption                 | 1        | 20       | 7,668    | .25       | .09                   | <b>.30</b>   | .09                   | .21           | .29  | .18           | .42  |  |
| Dedication                 | 1        | 20       | 7,667    | .26       | .12                   | <b>.31</b>   | .13                   | .21           | .31  | .14           | .48  |  |
| Vigor                      | 1        | 20       | 7,665    | .30       | .10                   | <b>.36</b>   | .11                   | .26           | .34  | .22           | .50  |  |
| <b>Career/Lifespan</b>     |          |          |          |           |                       |              |                       |               |      |               |      |  |
| Entrepreneurial intentions | 1        | 12       | 3,804    | .16       | .14                   | <b>.19</b>   | .15                   | .08           | .24  | -.003         | .38  |  |
| Procrastination            | 1        | 20       | 4,012    | -.62      | .05                   | <b>-.74</b>  | .03                   | -.64          | -.60 | -.77          | -.70 |  |
| Workaholism                | 1        | 5        | 1,807    | .13       | .15                   | <b>.16</b>   | .17                   | .00           | .26  | -.06          | .37  |  |
| Personal values            |          |          |          |           |                       |              |                       |               |      |               |      |  |
| Self-enhancement           | 1        | 54       | 53,377   | .00       | .07                   | <b>.00</b>   | .09                   | -.02          | .02  | -.11          | .11  |  |
| Achievement                | 1        | 55       | 54,946   | .12       | .09                   | <b>.15</b>   | .11                   | .10           | .14  | .01           | .30  |  |
| Hedonism                   | 1        | 54       | 54,391   | -.15      | .12                   | <b>-.20</b>  | .15                   | -.18          | -.12 | -.39          | -.01 |  |
| Power                      | 1        | 54       | 54,599   | .04       | .08                   | <b>.05</b>   | .09                   | .02           | .06  | -.06          | .17  |  |
| Self-transcendence         | 1        | 56       | 53,855   | .02       | .13                   | <b>.03</b>   | .16                   | -.01          | .05  | -.18          | .24  |  |
| Benevolence                | 1        | 56       | 55,072   | .05       | .13                   | <b>.07</b>   | .16                   | .02           | .08  | -.14          | .27  |  |
| Universalism               | 1        | 54       | 54,364   | -.01      | .15                   | <b>-.01</b>  | .18                   | -.05          | .03  | -.24          | .22  |  |
| Openness to change         | 1        | 54       | 53,369   | -.06      | .15                   | <b>-.08</b>  | .20                   | -.10          | -.02 | -.34          | .18  |  |
| Self-direction             | 1        | 55       | 54,959   | .01       | .18                   | <b>.01</b>   | .24                   | -.04          | .06  | -.30          | .32  |  |
| Stimulation                | 1        | 51       | 53,692   | -.12      | .14                   | <b>-.16</b>  | .18                   | -.16          | -.08 | -.39          | .07  |  |
| Conservation               | 1        | 54       | 53,369   | .17       | .10                   | <b>.23</b>   | .12                   | .14           | .20  | .08           | .39  |  |
| Conformity                 | 1        | 55       | 54,959   | .20       | .09                   | <b>.27</b>   | .11                   | .18           | .22  | .13           | .41  |  |
| Security                   | 1        | 54       | 54,377   | .27       | .14                   | <b>.38</b>   | .19                   | .23           | .31  | .13           | .62  |  |
| Tradition                  | 1        | 51       | 53,692   | .07       | .09                   | <b>.10</b>   | .12                   | .05           | .09  | -.06          | .25  |  |
| Vocational interests       |          |          |          |           |                       |              |                       |               |      |               |      |  |
| Realistic                  | 2        | 51       | 14,456   | .04       | .06 <sup>a</sup>      | <b>.05</b>   | .00                   | .02           | .06  | .05           | .05  |  |
| Investigative              | 2        | 51       | 14,456   | .09       | .06 <sup>a</sup>      | <b>.10</b>   | .02                   | .07           | .11  | .08           | .13  |  |
| Artistic                   | 2        | 51       | 14,456   | -.05      | .06 <sup>a</sup>      | <b>-.06</b>  | .00                   | -.07          | -.03 | -.06          | -.06 |  |

| Variable     | <i>m</i> | <i>k</i> | <i>N</i> | $\bar{r}$ | <i>SD<sub>r</sub></i> | $\bar{\rho}$ | <i>SD<sub>ρ</sub></i> | 95% <i>CI</i> |     | 80% <i>CR</i> |     |
|--------------|----------|----------|----------|-----------|-----------------------|--------------|-----------------------|---------------|-----|---------------|-----|
|              |          |          |          |           |                       |              |                       | LO            | HI  | LO            | HI  |
| Social       | 2        | 51       | 14,456   | .08       | .06 <sup>a</sup>      | <b>.09</b>   | .05                   | .06           | .10 | .03           | .16 |
| Enterprising | 2        | 51       | 14,456   | .07       | .06 <sup>a</sup>      | <b>.08</b>   | .00                   | .05           | .08 | .08           | .08 |
| Conventional | 2        | 51       | 14,456   | .18       | .06 <sup>a</sup>      | <b>.20</b>   | .01                   | .16           | .19 | .19           | .21 |

*Note.* *m* = total number of independent meta-analyses, *k* = number of independent samples, *N* = total sample size,  $\bar{r}$  = mean sample-size weighted observed correlation, *SD<sub>r</sub>* = mean observed standard deviation,  $\bar{\rho}$  = estimated population correlation (bold) corrected for unreliability, *SD<sub>ρ</sub>* = standard deviation of population correlation, 95% *CI* = 95% confidence interval around observed correlation, 80% *CR* = 80% credibility interval around population correlation. Values in the top 33% of effects (i.e.,  $\bar{\rho} \geq .24$ ) are presented in grayscale. For full output of second-order meta-analyses of Motivations, Values, and Interests variables, see Table S10.

<sup>a</sup> *SD<sub>r</sub>* was neither reported nor calculable from the source meta-analysis; thus, an estimate of variance due to sampling error is reported instead.

Table S5

## Meta-Analyses of C and Interpersonal Variables

| Variable                           | <i>m</i> | <i>k</i> | <i>N</i> | $\bar{r}$ | <i>SD<sub>r</sub></i> | $\bar{\rho}$ | <i>SD<sub>ρ</sub></i> | 95% <i>CI</i> |     | 80% <i>CR</i> |     |
|------------------------------------|----------|----------|----------|-----------|-----------------------|--------------|-----------------------|---------------|-----|---------------|-----|
|                                    |          |          |          |           |                       |              |                       | LO            | HI  | LO            | HI  |
| <b>Job Application</b>             |          |          |          |           |                       |              |                       |               |     |               |     |
| Employment interview               |          |          |          |           |                       |              |                       |               |     |               |     |
| Conventional/Low structure         | 1        | 18       | 2,163    | .13       | .08                   | <b>.18</b>   | .00                   | .09           | .17 | .18           | .18 |
| Behavioral/High structure          | 2        | 20       | 3,003    | .12       | .08                   | <b>.15</b>   | .00                   | .08           | .15 | .15           | .15 |
| Negotiation performance            | 2        | 11       | 900      | .04       | .21                   | <b>.05</b>   | .00                   | -.09          | .16 | .05           | .05 |
| Assessment center dimension        |          |          |          |           |                       |              |                       |               |     |               |     |
| Communication                      | 2        | 8        | 5,595    | .06       | .12                   | <b>.07</b>   | .00                   | -.03          | .14 | .07           | .07 |
| Consideration of others            | 2        | 9        | 5,823    | .09       | .08                   | <b>.11</b>   | .00                   | .03           | .14 | .11           | .11 |
| Influencing others                 | 2        | 8        | 5,771    | .09       | .15                   | <b>.11</b>   | .00                   | -.01          | .20 | .11           | .11 |
| Assessment center exercise         |          |          |          |           |                       |              |                       |               |     |               |     |
| Leaderless group discussion        | 1        | 10       | 2,801    | .04       | .11                   | <b>.05</b>   | .11                   | -.03          | .11 | -.09          | .19 |
| Oral presentation                  | 1        | 3        | 602      | .09       | .08                   | <b>.10</b>   | .05                   | -.004         | .18 | .04           | .17 |
| Role-play                          | 1        | 5        | 1,413    | .02       | .08                   | <b>.02</b>   | .06                   | -.05          | .09 | -.05          | .10 |
| <b>On the Job</b>                  |          |          |          |           |                       |              |                       |               |     |               |     |
| Social network roles               |          |          |          |           |                       |              |                       |               |     |               |     |
| Expressive: Brokerage              | 1        | 52       | 2,975    | .05       | .13                   | <b>.06</b>   | .01                   | .01           | .09 | .04           | .07 |
| Expressive: Indegree               | 1        | 54       | 3,943    | .05       | .12                   | <b>.06</b>   | .01                   | .02           | .08 | .05           | .07 |
| Instrumental: Brokerage            | 1        | 52       | 2,975    | .09       | .14                   | <b>.10</b>   | .06                   | .05           | .13 | .02           | .18 |
| Instrumental: Indegree             | 1        | 57       | 4,271    | .09       | .14                   | <b>.10</b>   | .09                   | .05           | .13 | -.02          | .22 |
| “Getting along” performance        | 2        | 40       | 3,736    | .15       | .11                   | <b>.21</b>   | .00                   | .11           | .19 | .21           | .21 |
| Interpersonal citizenship behavior | 1        | 28       | 6,347    | .16       | .14                   | <b>.22</b>   | .17                   | .11           | .21 | .002          | .44 |
| <b>Career/Lifespan</b>             |          |          |          |           |                       |              |                       |               |     |               |     |
| Interpersonal sensitivity          | 1        | 15       | 1,185    | .06       | .12                   | <b>.08</b>   | .05                   | .00           | .12 | .02           | .14 |



| Variable                     | <i>m</i> | <i>k</i> | <i>N</i> | $\bar{r}$ | $SD_r$ | $\bar{\rho}$ | $SD_\rho$ | 95% <i>CI</i> |      | 80% <i>CR</i> |      |  |
|------------------------------|----------|----------|----------|-----------|--------|--------------|-----------|---------------|------|---------------|------|--|
|                              |          |          |          |           |        |              |           | LO            | HI   | LO            | HI   |  |
| Leadership                   |          |          |          |           |        |              |           |               |      |               |      |  |
| Overall                      | 1        | 39       | 10,056   | .19       | .13    | <b>.27</b>   | .16       | .15           | .23  | .06           | .48  |  |
| Emergence                    | 1        | 17       | 3,655    | .23       | .07    | <b>.32</b>   | .03       | .20           | .26  | .29           | .36  |  |
| Effectiveness                | 1        | 18       | 3,870    | .11       | .07    | <b>.15</b>   | .01       | .08           | .14  | .14           | .17  |  |
| Group performance            | 1        | 5        | 203      | .21       | .18    | <b>.30</b>   | .12       | .06           | .37  | .14           | .46  |  |
| Transformational leadership  |          |          |          |           |        |              |           |               |      |               |      |  |
| Overall                      | 2        | 35       | 5,937    | .13       | .16    | <b>.18</b>   | .03       | .07           | .18  | .14           | .22  |  |
| Charisma                     | 2        | 16       | 3,212    | .07       | .09    | <b>.10</b>   | .00       | .03           | .12  | .10           | .10  |  |
| Intellectual stimulation     | 3        | 17       | 3,047    | .01       | .08    | <b>.02</b>   | .05       | -.03          | .05  | -.05          | .09  |  |
| Individualized consideration | 3        | 16       | 2,925    | .12       | .15    | <b>.16</b>   | .07       | .04           | .19  | .07           | .26  |  |
| Transactional leadership     |          |          |          |           |        |              |           |               |      |               |      |  |
| Contingent reward            | 1        | 6        | 1,469    | .02       | .07    | <b>.03</b>   | .02       | -.03          | .07  | -.001         | .06  |  |
| Management by exception      | 1        | 6        | 1,469    | -.02      | .06    | <b>-.03</b>  | .00       | -.07          | .03  | -.03          | -.03 |  |
| Passive leadership           | 1        | 7        | 1,564    | -.09      | .08    | <b>-.13</b>  | .07       | -.15          | -.03 | -.21          | -.04 |  |

*Note.* *m* = total number of independent meta-analyses, *k* = number of independent samples, *N* = total sample size,  $\bar{r}$  = mean sample-size weighted observed correlation,  $SD_r$  = mean observed standard deviation,  $\bar{\rho}$  = estimated population correlation (bold) corrected for unreliability,  $SD_\rho$  = standard deviation of population correlation, 95% *CI* = 95% confidence interval around observed correlation, 80% *CR* = 80% credibility interval around population correlation. Values in the top 33% of effects (i.e.,  $\bar{\rho} \geq .24$ ) are presented in grayscale. For full output of second-order meta-analyses of Interpersonal variables, see Table S11.

**Table S6**  
**Meta-Analyses of C and Attitudes and Well-Being Variables**

| Variable                                      | <i>m</i> | <i>k</i> | <i>N</i> | $\bar{r}$ | <i>SD<sub>r</sub></i> | $\bar{\rho}$ | <i>SD<sub>ρ</sub></i> | 95% <i>CI</i> |      | 80% <i>CR</i> |      |
|-----------------------------------------------|----------|----------|----------|-----------|-----------------------|--------------|-----------------------|---------------|------|---------------|------|
|                                               |          |          |          |           |                       |              |                       | LO            | HI   | LO            | HI   |
| <b>Education</b>                              |          |          |          |           |                       |              |                       |               |      |               |      |
| Adjustment to college                         |          |          |          |           |                       |              |                       |               |      |               |      |
| Overall                                       | 1        | 3        | 1,201    | .37       | .05                   | <b>.43</b>   | .04                   | .31           | .43  | .39           | .48  |
| Academic                                      | 1        | 6        | 2,089    | .45       | .13                   | <b>.55</b>   | .15                   | .35           | .55  | .36           | .74  |
| Social                                        | 1        | 6        | 2,202    | .24       | .07                   | <b>.30</b>   | .06                   | .18           | .30  | .22           | .37  |
| Personal-emotional                            | 1        | 5        | 1,644    | .23       | .14                   | <b>.28</b>   | .16                   | .11           | .35  | .08           | .49  |
| Institutional attachment                      | 1        | 4        | 1,556    | .31       | .05                   | <b>.38</b>   | .02                   | .26           | .36  | .35           | .41  |
| Study attitudes                               | 1        | 4        | 891      | .30       | .05                   | <b>.37</b>   | .00                   | .25           | .35  | .37           | .37  |
| Career decision-making difficulties           | 1        | 18       | 8,180    | -.22      | .07                   | <b>-.26</b>  | .06                   | -.25          | -.19 | -.33          | -.18 |
| <b>Job Application</b>                        |          |          |          |           |                       |              |                       |               |      |               |      |
| Applicant attraction to organization          | 1        | 17       | 6,282    | .12       | .15                   | <b>.14</b>   | .17                   | .05           | .19  | -.07          | .36  |
| Applicant reactions: Procedural justice       | 1        | 6        | 1,872    | .08       | .06                   | <b>.10</b>   | .00                   | .04           | .13  | .10           | .10  |
| Assessment center dimension: Stress tolerance | 2        | 5        | 5,086    | .14       | .12                   | <b>.17</b>   | .00                   | .03           | .24  | .17           | .17  |
| <b>On the Job</b>                             |          |          |          |           |                       |              |                       |               |      |               |      |
| Job satisfaction                              | 2        | 102      | 24,055   | .19       | .17                   | <b>.23</b>   | .00                   | .16           | .22  | .23           | .23  |
| Organizational commitment                     |          |          |          |           |                       |              |                       |               |      |               |      |
| Global                                        | 1        | 12       | 2,782    | .24       | .14                   | <b>.29</b>   | .15                   | .16           | .32  | .10           | .48  |
| Affective                                     | 1        | 38       | 11,041   | .20       | .15                   | <b>.25</b>   | .17                   | .15           | .25  | .03           | .46  |
| Continuance                                   | 1        | 18       | 5,407    | .02       | .10                   | <b>.03</b>   | .11                   | -.03          | .07  | -.11          | .16  |
| Normative                                     | 1        | 16       | 5,117    | .14       | .09                   | <b>.18</b>   | .09                   | .10           | .18  | .06           | .29  |
| Turnover intentions                           | 2        | 20       | 5,165    | -.10      | .10                   | <b>-.13</b>  | .04                   | -.15          | -.06 | -.17          | -.08 |
| Work-life balance                             |          |          |          |           |                       |              |                       |               |      |               |      |
| Family interference with work                 | 1        | 14       | 4,494    | -.20      | .10                   | <b>-.25</b>  | .11                   | -.26          | -.15 | -.39          | -.11 |
| Work interference with family                 | 1        | 21       | 6,427    | -.16      | .12                   | <b>-.20</b>  | .13                   | -.21          | -.11 | -.37          | -.04 |
| Work-nonwork spillover: Negative              | 1        | 20       | 6,924    | -.18      | .07                   | <b>-.22</b>  | .05                   | -.21          | -.15 | -.28          | -.15 |

|                                  |   |    |        |      |     |             |     |      |      |      |      |
|----------------------------------|---|----|--------|------|-----|-------------|-----|------|------|------|------|
| Work-nonwork spillover: Positive | 1 | 3  | 2,646  | .11  | .05 | <b>.14</b>  | .04 | .06  | .17  | .08  | .20  |
| Expatriate adjustment            |   |    |        |      |     |             |     |      |      |      |      |
| Overall                          | 1 | 22 | 4,137  | .16  | .11 | <b>.20</b>  | .10 | .11  | .21  | .07  | .32  |
| General                          | 1 | 12 | 2,735  | .10  | .09 | <b>.13</b>  | .07 | .05  | .15  | .04  | .21  |
| Interactional                    | 1 | 13 | 2,917  | .13  | .07 | <b>.16</b>  | .01 | .09  | .17  | .14  | .17  |
| Work                             | 1 | 13 | 2,743  | .20  | .09 | <b>.24</b>  | .08 | .15  | .25  | .14  | .35  |
| Burnout                          |   |    |        |      |     |             |     |      |      |      |      |
| Emotional exhaustion             | 2 | 55 | 15,758 | -.14 | .12 | <b>-.17</b> | .00 | -.18 | -.11 | -.17 | -.17 |
| Depersonalization                | 2 | 53 | 14,319 | -.20 | .15 | <b>-.26</b> | .00 | -.24 | -.16 | -.26 | -.26 |
| Personal accomplishment          | 2 | 51 | 12,524 | .27  | .15 | <b>.35</b>  | .03 | .23  | .31  | .30  | .39  |
| Leader-member exchange           | 1 | 9  | 2,075  | .17  | .07 | <b>.20</b>  | .03 | .12  | .22  | .16  | .24  |
| Abusive supervision perceptions  | 1 | 12 | 4,368  | -.12 | .09 | <b>-.15</b> | .09 | -.17 | -.07 | -.27 | -.03 |
| Workplace harassment perceptions | 1 | 14 | 5,946  | .11  | .07 | <b>.13</b>  | .06 | .07  | .14  | .06  | .20  |
| Justice perceptions              |   |    |        |      |     |             |     |      |      |      |      |
| Distributive                     | 1 | 24 | 8,313  | .16  | .11 | <b>.19</b>  | .11 | .12  | .20  | .04  | .33  |
| Informational                    | 1 | 7  | 3,530  | .17  | .09 | <b>.20</b>  | .09 | .10  | .24  | .08  | .32  |
| Interpersonal                    | 1 | 16 | 5,710  | .13  | .14 | <b>.16</b>  | .16 | .06  | .20  | -.04 | .36  |
| Procedural                       | 1 | 31 | 9,412  | .14  | .12 | <b>.17</b>  | .13 | .10  | .18  | .01  | .33  |
| Safety climate                   | 1 | 5  | 971    | .10  | .07 | <b>.12</b>  | .01 | .04  | .16  | .10  | .13  |
| <b>Career/Lifespan</b>           |   |    |        |      |     |             |     |      |      |      |      |
| Career adaptability              | 1 | 12 | 11,038 | .42  | .12 | <b>.48</b>  | .13 | .35  | .49  | .31  | .65  |
| Career satisfaction              | 1 | 13 | 11,050 | .13  | .07 | <b>.16</b>  | .08 | .09  | .17  | .06  | .26  |
| Life satisfaction                | 2 | 46 | 8,303  | .19  | .10 | <b>.24</b>  | .03 | .16  | .22  | .20  | .28  |
| Happiness                        | 1 | 4  | 441    | .25  | .08 | <b>.29</b>  | .00 | .17  | .33  | .29  | .29  |
| Quality of life                  | 1 | 4  | 767    | .40  | .07 | <b>.52</b>  | .03 | .34  | .47  | .48  | .56  |

*Note.*  $m$  = total number of independent meta-analyses,  $k$  = number of independent samples,  $N$  = total sample size,  $\bar{r}$  = mean sample-size weighted observed correlation,  $SD_r$  = mean observed standard deviation,  $\bar{\rho}$  = estimated population correlation (bold) corrected for unreliability,  $SD_{\rho}$  = standard deviation of population correlation, 95%  $CI$  = 95% confidence interval around observed correlation, 80%  $CR$  = 80% credibility interval around population correlation. Values in the top 33% of effects (i.e.,  $\bar{\rho} \geq .24$ ) are presented in grayscale. For full output of second-order meta-analyses of Attitudes and Well-Being variables, see Table S12.

**Table S7**  
**Meta-Analyses of C and Counterproductivity Variables**

| Variables                       | <i>m</i> | <i>k</i> | <i>N</i> | $\bar{r}$         | <i>SD<sub>r</sub></i> | $\bar{\rho}$ | <i>SD<sub>ρ</sub></i> | 95% <i>CI</i> |      | 80% <i>CR</i> |       |  |
|---------------------------------|----------|----------|----------|-------------------|-----------------------|--------------|-----------------------|---------------|------|---------------|-------|--|
|                                 |          |          |          |                   |                       |              |                       | LO            | HI   | LO            | HI    |  |
| <b>Education</b>                |          |          |          |                   |                       |              |                       |               |      |               |       |  |
| Academic dishonesty             | 1        | 16       | 5,154    | -.18              | .09                   | <b>-.22</b>  | .09                   | -.22          | -.14 | -.34          | -.11  |  |
| <b>Job Application</b>          |          |          |          |                   |                       |              |                       |               |      |               |       |  |
| Applicant faking <sup>c</sup>   | 1        | 27       | 88,266   | .22               | .06                   | <b>.25</b>   | .07                   | .20           | .24  | .16           | .33   |  |
| <b>On the Job</b>               |          |          |          |                   |                       |              |                       |               |      |               |       |  |
| Safety performance              | 1        | 16       | 3,995    | .21               | .09                   | <b>.26</b>   | .08                   | .17           | .25  | .15           | .36   |  |
| Irresponsible behavior          | 1        | 37       | 59,076   | -.25 <sup>a</sup> | .02 <sup>b</sup>      | <b>-.37</b>  | .00                   | -.26          | -.24 | -.37          | -.37  |  |
| Counterproductive work behavior |          |          |          |                   |                       |              |                       |               |      |               |       |  |
| Overall                         | 3        | 17       | 4,350    | -.17              | .16                   | <b>-.22</b>  | .06                   | -.25          | -.09 | -.29          | -.15  |  |
| Other-ratings                   | 1        | 13       | 3,332    | -.15              | .13                   | <b>-.22</b>  | .17                   | -.22          | -.08 | -.43          | -.005 |  |
| Interpersonal                   | 1        | 11       | 3,458    | -.19              | .12                   | <b>-.23</b>  | .13                   | -.26          | -.12 | -.40          | -.07  |  |
| Organizational                  | 1        | 8        | 2,934    | -.34              | .08                   | <b>-.42</b>  | .08                   | -.40          | -.28 | -.53          | -.32  |  |
| Cyberloafing                    | 1        | 11       | 3,212    | -.09              | .07                   | <b>-.11</b>  | .05                   | -.13          | -.05 | -.17          | -.05  |  |
| Withdrawal behavior             | 1        | 11       | 2,774    | -.21              | .19                   | <b>-.27</b>  | .23                   | -.32          | -.10 | -.56          | .03   |  |
| Absenteeism                     | 1        | 13       | 1,582    | -.13              | .11                   | <b>-.16</b>  | .08                   | -.19          | -.07 | -.25          | -.06  |  |
| <b>Career/Lifespan</b>          |          |          |          |                   |                       |              |                       |               |      |               |       |  |
| Turnover                        |          |          |          |                   |                       |              |                       |               |      |               |       |  |
| Turnover/tenure                 | 1        | 19       | 2,759    | -.09              | .11                   | <b>-.13</b>  | .10                   | -.14          | -.04 | -.26          | .004  |  |
| Turnover                        | 1        | 17       | 1,631    | -.18              | .10                   | <b>-.22</b>  | .03                   | -.23          | -.13 | -.26          | -.18  |  |
| Voluntary turnover              | 1        | 8        | 3,409    | -.15              | .13                   | <b>-.18</b>  | .15                   | -.24          | -.06 | -.38          | .01   |  |
| Antisocial behavior             | 2        | 44       | 14,892   | -.24              | .05                   | <b>-.29</b>  | .00                   | -.25          | -.22 | -.29          | -.29  |  |
| Aggression                      | 1        | 35       | 10,214   | -.18              | .06                   | <b>-.22</b>  | .01                   | -.20          | -.16 | -.23          | -.21  |  |
| Accidents                       |          |          |          |                   |                       |              |                       |               |      |               |       |  |
| Occupational                    | 1        | 9        | 2,163    | -.11              | .07                   | <b>-.18</b>  | .06                   | -.16          | -.06 | -.26          | -.11  |  |
| Vehicular                       | 1        | 36       | 23,873   | -.08              | .08                   | <b>-.11</b>  | .12                   | -.09          | -.04 | -.26          | .04   |  |

*Note.*  $m$  = total number of independent meta-analyses,  $k$  = number of independent samples,  $N$  = total sample size,  $\bar{r}$  = mean sample-size weighted observed correlation,  $SD_r$  = mean observed standard deviation,  $\bar{\rho}$  = estimated population correlation (bold) corrected for unreliability,  $SD_\rho$  = standard deviation of population correlation, 95% CI = 95% confidence interval around observed correlation, 80% CR = 80% credibility interval around population correlation. Values in the top 33% of effects (i.e.,  $\bar{\rho} \geq .24$ ) are presented in grayscale. For full output of second-order meta-analyses of Counterproductivity variables, see Table S13.

<sup>a</sup> Mean sample-size weighted observed correlation is a composite. For details on composite formation, see the Supplemental Methods section.

<sup>b</sup>  $SD_r$  was neither reported nor calculable from the source meta-analysis; thus, an estimate of variance due to sampling error is reported instead.

<sup>c</sup> Effect is not a function of C, but rather reflects evidence that job applicants self-report higher levels of C than job incumbents.

Table S8

## Meta-Analyses of C and Performance Variables

| Variable                            | <i>m</i> | <i>k</i> | <i>N</i> | $\bar{r}$        | $SD_r$           | $\bar{\rho}$ | $SD_{\rho}$ | 95% <i>CI</i> |     | 80% <i>CR</i> |     |  |
|-------------------------------------|----------|----------|----------|------------------|------------------|--------------|-------------|---------------|-----|---------------|-----|--|
|                                     |          |          |          |                  |                  |              |             | LO            | HI  | LO            | HI  |  |
| <b>Education</b>                    |          |          |          |                  |                  |              |             |               |     |               |     |  |
| Study habits                        | 1        | 5        | 1,194    | .29              | .13              | <b>.36</b>   | .14         | .18           | .40 | .18           | .54 |  |
| Academic attendance                 | 1        | 6        | 1,874    | .22              | .11              | <b>.28</b>   | .12         | .13           | .31 | .12           | .43 |  |
| Academic performance                | 1        | 138      | 70,926   | .19              | .21              | <b>.24</b>   | .26         | .15           | .23 | -.09          | .57 |  |
| Academic performance: Postsecondary | 4        | 91       | 35,035   | .21              | .07              | <b>.24</b>   | .03         | .20           | .22 | .20           | .27 |  |
| Academic success                    | 1        | 37       | 15,650   | .24 <sup>a</sup> | .05 <sup>b</sup> | <b>.30</b>   | .02         | .23           | .26 | .28           | .32 |  |
| Educational attainment              | 1        | 25       | 18,528   | .11              | .04              | <b>.13</b>   | .02         | .10           | .13 | .11           | .15 |  |
| Training performance                | 6        | 47       | 10,415   | .12              | .10              | <b>.16</b>   | .00         | .10           | .15 | .16           | .16 |  |
| Training success                    | 2        | 27       | 3,368    | .19              | .09              | <b>.25</b>   | .00         | .16           | .23 | .25           | .25 |  |
| <b>Job Application</b>              |          |          |          |                  |                  |              |             |               |     |               |     |  |
| Situational judgment tests          |          |          |          |                  |                  |              |             |               |     |               |     |  |
| Knowledge                           | 1        | 38       | 23,043   | .21              | .10              | <b>.24</b>   | .10         | .18           | .24 | .10           | .37 |  |
| Behavioral tendency                 | 1        | 15       | 8,234    | .30              | .16              | <b>.34</b>   | .17         | .22           | .38 | .11           | .56 |  |
| Job search success                  |          |          |          |                  |                  |              |             |               |     |               |     |  |
| Job search intensity                | 1        | 27       | 20,156   | .04              | .10              | <b>.05</b>   | .11         | .003          | .08 | -.09          | .19 |  |
| Employment status                   | 1        | 8        | 7,171    | .00              | .04              | <b>.00</b>   | .03         | -.03          | .03 | -.04          | .04 |  |
| Employment quality                  | 1        | 5        | 1,819    | .05              | .05              | <b>.06</b>   | .002        | .004          | .10 | .05           | .06 |  |
| Assessment center dimension         |          |          |          |                  |                  |              |             |               |     |               |     |  |
| Organizing and planning             | 2        | 9        | 6,194    | .09              | .08              | <b>.11</b>   | .07         | .04           | .14 | .02           | .20 |  |
| Problem solving                     | 2        | 8        | 5,597    | .09              | .10              | <b>.10</b>   | .06         | .02           | .15 | .02           | .18 |  |
| Assessment center exercise          |          |          |          |                  |                  |              |             |               |     |               |     |  |
| Case analysis                       | 1        | 3        | 358      | .04              | .10              | <b>.05</b>   | .04         | -.07          | .15 | -.002         | .10 |  |
| In-basket                           | 1        | 4        | 717      | .13              | .12              | <b>.16</b>   | .11         | .02           | .24 | .02           | .30 |  |

| <b>On the Job<sup>c</sup></b>       |    |     |        |                  |     |            |     |      |     |      |     |
|-------------------------------------|----|-----|--------|------------------|-----|------------|-----|------|-----|------|-----|
| <b><i>In-Role</i></b>               |    |     |        |                  |     |            |     |      |     |      |     |
| Occupational performance            | 5  | 296 | 52,937 | .13              | .11 | <b>.18</b> | .02 | .11  | .14 | .15  | .21 |
| Training and job performance        | 1  | 94  | 14,059 | .15              | .11 | <b>.23</b> | .12 | .13  | .17 | .08  | .38 |
| Overall job performance             |    |     |        |                  |     |            |     |      |     |      |     |
| Supervisor-ratings                  | 10 | 254 | 74,835 | .17              | .09 | <b>.27</b> | .04 | .16  | .18 | .22  | .33 |
| Peer-ratings                        | 1  | 12  | 3,504  | .12 <sup>a</sup> | .11 | <b>.26</b> | .19 | .06  | .19 | .01  | .51 |
| Subordinate-ratings                 | 1  | 10  | 3,790  | .01              | .06 | <b>.02</b> | .07 | -.03 | .05 | -.07 | .11 |
| Self-ratings                        | 1  | 8   | 2,621  | .25              | .09 | <b>.31</b> | .09 | .19  | .31 | .19  | .43 |
| Maximal performance                 | 1  | 5   | 1,769  | .08              | .07 | <b>.12</b> | .07 | .02  | .14 | .03  | .22 |
| Typical performance                 | 1  | 5   | 1,769  | .14              | .06 | <b>.22</b> | .04 | .09  | .19 | .17  | .26 |
| Technical performance               | 3  | 152 | 54,000 | .18              | .11 | <b>.23</b> | .02 | .16  | .20 | .20  | .26 |
| <b><i>Extra-Role</i></b>            |    |     |        |                  |     |            |     |      |     |      |     |
| Contextual performance              | 2  | 41  | 24,282 | .17              | .09 | <b>.23</b> | .08 | .14  | .19 | .13  | .33 |
| Organizational citizenship behavior |    |     |        |                  |     |            |     |      |     |      |     |
| Overall                             | 1  | 71  | 14,355 | .14              | .12 | <b>.19</b> | .13 | .11  | .17 | .02  | .36 |
| Global                              | 1  | 30  | 6,233  | .15              | .11 | <b>.21</b> | .12 | .11  | .19 | .05  | .36 |
| Organizational                      | 1  | 20  | 4,025  | .13              | .09 | <b>.18</b> | .08 | .09  | .17 | .08  | .28 |
| <b><i>Change-Oriented</i></b>       |    |     |        |                  |     |            |     |      |     |      |     |
| Change                              | 1  | 17  | 2,629  | .08              | .11 | <b>.11</b> | .10 | .03  | .13 | -.02 | .24 |
| Voice                               |    |     |        |                  |     |            |     |      |     |      |     |
| Overall                             | 1  | 12  | 3,450  | .12              | .12 | <b>.15</b> | .13 | .05  | .19 | -.02 | .31 |
| Prohibitive                         | 1  | 4   | 1,143  | .09              | .09 | <b>.11</b> | .08 | .003 | .18 | .01  | .21 |
| Promotive                           | 1  | 8   | 2,307  | .11              | .12 | <b>.13</b> | .12 | .03  | .19 | -.03 | .29 |
| Adaptive performance                | 2  | 79  | 9,949  | .08              | .13 | <b>.10</b> | .00 | .05  | .11 | .10  | .10 |
| Creativity                          | 2  | 56  | 16,688 | .06              | .07 | <b>.08</b> | .00 | .04  | .08 | .08  | .08 |
| Performance rating leniency         | 1  | 18  | 2,974  | .08              | .16 | <b>.10</b> | .17 | .01  | .15 | -.12 | .31 |
| <b>Career/Lifespan</b>              |    |     |        |                  |     |            |     |      |     |      |     |
| Job complexity                      | 1  | 4   | 4,070  | .02              | .03 | <b>.02</b> | .00 | -.01 | .05 | .02  | .02 |
| Job crafting                        | 1  | 5   | 2,944  | .15              | .08 | <b>.19</b> | .09 | .08  | .22 | .08  | .30 |

|                       |   |    |        |                  |                  |            |     |     |     |       |     |
|-----------------------|---|----|--------|------------------|------------------|------------|-----|-----|-----|-------|-----|
| Personnel data        | 2 | 35 | 6,905  | .10              | .11              | <b>.14</b> | .01 | .06 | .13 | .13   | .15 |
| Commendable behavior  | 1 | 23 | 45,852 | .33 <sup>a</sup> | .02 <sup>b</sup> | <b>.47</b> | .00 | .32 | .34 | .47   | .48 |
| Productivity          | 3 | 28 | 3,429  | .14              | .08              | <b>.17</b> | .04 | .11 | .17 | .12   | .22 |
| Organizational tenure | 1 | 32 | 8,818  | .07              | .06              | <b>.09</b> | .01 | .05 | .09 | .08   | .09 |
| Status change         | 1 | 8  | 2,698  | .11              | .06              | <b>.16</b> | .04 | .07 | .15 | .11   | .21 |
| Promotions            | 1 | 13 | 3,520  | .06              | .06              | <b>.07</b> | .00 | .03 | .09 | .06   | .07 |
| Salary                | 1 | 20 | 12,019 | .09              | .08              | <b>.10</b> | .08 | .05 | .12 | -.002 | .20 |

*Note.*  $m$  = total number of independent meta-analyses,  $k$  = number of independent samples,  $N$  = total sample size,  $\bar{r}$  = mean sample-size weighted observed correlation,  $SD_r$  = mean observed standard deviation,  $\bar{\rho}$  = estimated population correlation (bold) corrected for unreliability,  $SD_\rho$  = standard deviation of population correlation, 95% *CI* = 95% confidence interval around observed correlation, 80% *CR* = 80% credibility interval around population correlation. Values in the top 33% of effects (i.e.,  $\bar{\rho} \geq .24$ ) are presented in grayscale. For full output of second-order meta-analyses of Performance variables, see Table S14.

<sup>a</sup> Mean sample-size weighted observed correlation is a composite. For details on composite formation, see the Supplemental Methods section.

<sup>b</sup>  $SD_r$  was neither reported nor calculable from the source meta-analysis; thus, an estimate of variance due to sampling error is reported instead.

<sup>c</sup> Given the larger number of contributing variables, we divided the On the Job domain into three subcategories of performance: *In-Role* (i.e., performance that is mandatory), *Extra-Role* (i.e., performance that is discretionary, but encouraged), and *Change-Oriented* (i.e., performance that is directed at making or advocating change); their respective effects are  $\bar{\rho} = .21, .20, \text{ and } .11$ .



Table S9

## Meta-Analyses of C and Occupational Performance across Occupations

| Variable                   | $m$ | $k$ | $N$    | $\bar{r}$ | $SD_r$ | $\bar{\rho}$ | $SD_\rho$ | 95% CI |     | 80% CR |     | DOT  |
|----------------------------|-----|-----|--------|-----------|--------|--------------|-----------|--------|-----|--------|-----|------|
|                            |     |     |        |           |        |              |           | LO     | HI  | LO     | HI  |      |
| <b>Low Complexity</b>      |     |     |        |           |        |              |           |        |     |        |     |      |
| Skilled/Semi-Skilled       | 5   | 58  | 12,028 | .14       | .10    | <b>.21</b>   | .09       | .12    | .17 | .09    | .32 | 5.52 |
| <b>Moderate Complexity</b> |     |     |        |           |        |              |           |        |     |        |     |      |
| Sales                      | 5   | 46  | 5,345  | .16       | .09    | <b>.23</b>   | .05       | .13    | .19 | .16    | .29 | 5.00 |
| Military                   | 3   | 19  | 5,676  | .18       | .08    | <b>.25</b>   | .05       | .14    | .21 | .19    | .31 | 4.92 |
| Health Care                | 2   | 18  | 1,531  | .23       | .13    | <b>.33</b>   | .00       | .17    | .29 | .33    | .33 | 4.33 |
| Customer Service           | 3   | 17  | 2,798  | .16       | .10    | <b>.23</b>   | .02       | .11    | .21 | .20    | .26 | 3.67 |
| Police                     | 3   | 25  | 3,069  | .14       | .15    | <b>.20</b>   | .00       | .08    | .20 | .20    | .20 | 3.67 |
| <b>High Complexity</b>     |     |     |        |           |        |              |           |        |     |        |     |      |
| Managerial                 | 8   | 105 | 20,227 | .11       | .10    | <b>.15</b>   | .00       | .09    | .13 | .15    | .15 | 3.06 |
| Professional               | 5   | 70  | 6,838  | .09       | .15    | <b>.13</b>   | .01       | .05    | .12 | .12    | .14 | 2.69 |

Note.  $m$  = total number of independent meta-analyses,  $k$  = number of independent samples,  $N$  = total sample size,  $\bar{r}$  = mean sample-size weighted observed correlation,  $SD_r$  = mean observed standard deviation,  $\bar{\rho}$  = estimated population correlation (bold) corrected for unreliability,  $SD_\rho$  = standard deviation of population correlation, 95% CI = 95% confidence interval around observed correlation, 80% CR = 80% credibility interval around population correlation. DOT = overall grand mean complexity rating across Data, People, and Things dimensions from the Dictionary of Occupational Titles (DOT); smaller ratings reflect greater occupational complexity. Values in the top 33% of effects (i.e.,  $\bar{\rho} \geq .24$ ) are presented in grayscale. For full output of second-order meta-analyses of performance across occupations, see Table S15.

Table S10

## Second-Order Meta-Analyses of C and Motivations, Values, and Interests Variables

| Variable                           | <i>k</i> | <i>N</i> | $\bar{r}$ | $SD_r$           | $\bar{\rho}$ | $VAR_2$ | $\bar{\rho}_M$ | $VAR_{2M}$ | $VAR_{2SE}$ | $VAR_{True}$ | %   |
|------------------------------------|----------|----------|-----------|------------------|--------------|---------|----------------|------------|-------------|--------------|-----|
| <b>Job Application</b>             |          |          |           |                  |              |         |                |            |             |              |     |
| Assessment center dimension: Drive |          |          |           |                  |              |         |                |            |             |              |     |
| Dilchert & Ones (2009)             | 2        | 4,778    | .31       | .13 <sup>a</sup> | <b>.38</b>   | .0127   | <b>.18</b>     | .0076      | .0039       | .0037        | 51  |
| Meriac et al. (2008)               | 7        | 1,184    | .10       | .13              | <b>.12</b>   | .0035   |                | (.09)      | (.06)       | (.06)        |     |
| <b>Career/Lifespan</b>             |          |          |           |                  |              |         |                |            |             |              |     |
| Vocational interests               |          |          |           |                  |              |         |                |            |             |              |     |
| Realistic                          |          |          |           |                  |              |         |                |            |             |              |     |
| Mount et al. (2005)                | 46       | 12,433   | .04       | .06 <sup>b</sup> | <b>.05</b>   | .0001   | <b>.05</b>     | .0000      | .0001       | -.0001       | 100 |
| Staggs et al. (2007)               | 5        | 2,023    | .04       | .05 <sup>b</sup> | <b>.05</b>   | .0008   |                | (.01)      | (.01)       | (.00)        |     |
| Investigative                      |          |          |           |                  |              |         |                |            |             |              |     |
| Mount et al. (2005)                | 46       | 12,433   | .08       | .06 <sup>b</sup> | <b>.09</b>   | .0001   | <b>.10</b>     | .0003      | .0001       | .0002        | 24  |
| Staggs et al. (2007)               | 5        | 2,023    | .15       | .05 <sup>b</sup> | <b>.17</b>   | .0006   |                | (.02)      | (.01)       | (.02)        |     |
| Artistic                           |          |          |           |                  |              |         |                |            |             |              |     |
| Mount et al. (2005)                | 46       | 12,433   | -.05      | .06 <sup>b</sup> | <b>-.06</b>  | .0001   | <b>-.06</b>    | .0000      | .0001       | -.0001       | 100 |
| Staggs et al. (2007)               | 5        | 2,023    | -.04      | .05 <sup>b</sup> | <b>-.05</b>  | .0008   |                | (.00)      | (.01)       | (.00)        |     |
| Social                             |          |          |           |                  |              |         |                |            |             |              |     |
| Mount et al. (2005)                | 46       | 12,433   | .06       | .06 <sup>b</sup> | <b>.07</b>   | .0001   | <b>.09</b>     | .0017      | .0001       | .0016        | 5   |
| Staggs et al. (2007)               | 5        | 2,023    | .21       | .05 <sup>b</sup> | <b>.24</b>   | .0007   |                | (.05)      | (.01)       | (.05)        |     |
| Enterprising                       |          |          |           |                  |              |         |                |            |             |              |     |
| Mount et al. (2005)                | 46       | 12,433   | .07       | .06 <sup>b</sup> | <b>.08</b>   | .0001   | <b>.08</b>     | .0001      | .0001       | .0000        | 100 |
| Staggs et al. (2007)               | 5        | 2,023    | .04       | .05 <sup>b</sup> | <b>.05</b>   | .0008   |                | (.01)      | (.01)       | (.00)        |     |
| Conventional                       |          |          |           |                  |              |         |                |            |             |              |     |
| Mount et al. (2005)                | 46       | 12,433   | .17       | .06 <sup>b</sup> | <b>.20</b>   | .0001   | <b>.20</b>     | .0000      | .0001       | .0001        | 73  |
| Staggs et al. (2007)               | 5        | 2,023    | .21       | .05 <sup>b</sup> | <b>.22</b>   | .0005   |                | (.01)      | (.01)       | (.01)        |     |

Note. *k* = number of independent samples, *N* = total sample size,  $\bar{r}$  = mean sample-size weighted observed correlation,  $SD_r$  = mean observed standard deviation,  $\bar{\rho}$  = estimated population correlation (bold) corrected for unreliability,  $VAR_2$  = second-order sampling error variance associated with each first-order meta-analytic correlation,  $\bar{\rho}_M$  = second-order, grand mean population correlation (bold) corrected for unreliability in the predictor and the criterion,  $VAR_{2M}$  = the mean observed variance and standard deviation (in parentheses) across first-order mean estimated population correlations, which includes corrections for first-order sampling error and measurement error,  $VAR_{2SE}$  = expected (mean) second-order sampling error variance and standard error (in parentheses),  $VAR_{True}$  = estimated

residual (i.e., true) population variance and standard deviation (in parentheses) across first-order mean population correlation estimates after accounting for variance attributable to expected second-order sampling error and measurement error (negative values set to zero), % = percentage of observed variance across first-order mean population correlation estimates attributable to second-order sampling error and measurement error.

<sup>a</sup> To reduce biasing effects associated with the smaller  $k$  meta-analysis of Dilchert and Ones (2009), the  $SD_r$  from the meta-analysis with the largest  $k$  (i.e., Meriac et al., 2008) was imputed prior to second-order cumulation.

<sup>b</sup>  $SD_r$  was neither reported nor calculable from the source meta-analysis; thus, an estimate of variance due to sampling error is reported instead.

**Table S11**  
**Second-Order Meta-Analyses of C and Interpersonal Variables**

| Variable                                        | <i>k</i> | <i>N</i> | $\bar{r}$        | $SD_r$           | $\bar{\rho}$ | $VAR_2$ | $\bar{\rho}_M$ | $VAR_{2M}$ | $VAR_{2SE}$ | $VAR_{True}$ | %   |
|-------------------------------------------------|----------|----------|------------------|------------------|--------------|---------|----------------|------------|-------------|--------------|-----|
| <b>Job Application</b>                          |          |          |                  |                  |              |         |                |            |             |              |     |
| Employment interview: Behavioral/High structure |          |          |                  |                  |              |         |                |            |             |              |     |
| Roth et al. (2005)                              | 7        | 1,506    | .12              | .03              | <b>.16</b>   | .0002   | <b>.15</b>     | .0002      | .0002       | .0000        | 100 |
| Salgado & Moscoso (2002)                        | 13       | 1,497    | .08              | .10              | <b>.10</b>   | .0023   |                | (.01)      | (.01)       | (.00)        |     |
| Negotiation performance                         |          |          |                  |                  |              |         |                |            |             |              |     |
| Sharma et al. (2013): Lab                       | 4        | 253      | .02              | .15              | <b>.02</b>   | .0056   | <b>.05</b>     | .0004      | .0069       | -.0065       | 100 |
| Sharma et al. (2013): Field                     | 7        | 647      | .06              | .24              | <b>.08</b>   | .0146   |                | (.02)      | (.08)       | (.00)        |     |
| Assessment center dimension                     |          |          |                  |                  |              |         |                |            |             |              |     |
| Communication                                   |          |          |                  |                  |              |         |                |            |             |              |     |
| Dilchert & Ones (2009)                          | 2        | 4,776    | -.05             | .12 <sup>a</sup> | <b>-.06</b>  | .0104   | <b>.07</b>     | .0037      | .0038       | -.0001       | 100 |
| Meriac et al. (2008)                            | 6        | 819      | .09              | .12              | <b>.11</b>   | .0036   |                | (.06)      | (.06)       | (.00)        |     |
| Consideration of others                         |          |          |                  |                  |              |         |                |            |             |              |     |
| Dilchert & Ones (2009)                          | 2        | 4,777    | .07              | .08 <sup>a</sup> | <b>.09</b>   | .0053   | <b>.11</b>     | .0001      | .0014       | -.0014       | 100 |
| Meriac et al. (2008)                            | 7        | 1,046    | .09              | .08              | <b>.11</b>   | .0014   |                | (.01)      | (.04)       | (.00)        |     |
| Influencing others                              |          |          |                  |                  |              |         |                |            |             |              |     |
| Dilchert & Ones (2009)                          | 2        | 4,777    | .10              | .15 <sup>a</sup> | <b>.12</b>   | .0162   | <b>.11</b>     | .0000      | .0056       | -.0056       | 100 |
| Meriac et al. (2008)                            | 6        | 994      | .09              | .15              | <b>.11</b>   | .0056   |                | (.00)      | (.08)       | (.00)        |     |
| <b>On the Job</b>                               |          |          |                  |                  |              |         |                |            |             |              |     |
| “Getting along” performance                     |          |          |                  |                  |              |         |                |            |             |              |     |
| Hogan & Holland (2003)                          | 26       | 2,949    | .14              | .11              | <b>.19</b>   | .0011   | <b>.21</b>     | .0003      | .0006       | -.0003       | 100 |
| Hough (1992)                                    | 14       | 787      | .18 <sup>b</sup> | .13 <sup>c</sup> | <b>.25</b>   | .0029   |                | (.02)      | (.03)       | (.00)        |     |
| <b>Career/Lifespan</b>                          |          |          |                  |                  |              |         |                |            |             |              |     |
| Transformational leadership                     |          |          |                  |                  |              |         |                |            |             |              |     |
| Overall                                         |          |          |                  |                  |              |         |                |            |             |              |     |
| Bono & Judge (2002)                             | 18       | 3,516    | .10              | .12              | <b>.14</b>   | .0016   | <b>.18</b>     | .0023      | .0012       | .0011        | 52  |
| Deinert et al. (2015) <sup>d</sup>              | 17       | 2,421    | .21              | .20              | <b>.30</b>   | .0048   |                | (.05)      | (.03)       | (.03)        |     |

| Variable                           | $k$ | $N$   | $\bar{r}$ | $SD_r$ | $\bar{\rho}$ | $VAR_2$ | $\bar{\rho}_M$ | $VAR_{2M}$ | $VAR_{2SE}$ | $VAR_{True}$ | %   |
|------------------------------------|-----|-------|-----------|--------|--------------|---------|----------------|------------|-------------|--------------|-----|
| Charisma                           |     |       |           |        |              |         |                |            |             |              |     |
| Banks et al. (2017) <sup>d</sup>   | 8   | 1,607 | .10       | .09    | <b>.14</b>   | .0020   | <b>.10</b>     | .0006      | .0010       | -.0004       | 100 |
| Bono & Judge (2002)                | 8   | 1,605 | .05       | .09    | <b>.07</b>   | .0020   |                | (.02)      | (.03)       | (.00)        |     |
| Individualized consideration       |     |       |           |        |              |         |                |            |             |              |     |
| Bono & Judge (2002)                | 8   | 1,828 | .10       | .19    | <b>.14</b>   | .0080   | <b>.16</b>     | .0079      | .0028       | .0051        | 35  |
| Deinert et al. (2015) <sup>d</sup> | 4   | 462   | .00       | .11    | <b>.00</b>   | .0030   |                | (.09)      | (.05)       | (.07)        |     |
| DeRue et al. (2011)                | 4   | 635   | .21       | .09    | <b>.29</b>   | .0039   |                |            |             |              |     |
| Intellectual stimulation           |     |       |           |        |              |         |                |            |             |              |     |
| Bono & Judge (2002)                | 8   | 1,828 | .02       | .09    | <b>.03</b>   | .0023   | <b>.02</b>     | .0037      | .0009       | .0028        | 24  |
| Deinert et al. (2015) <sup>d</sup> | 5   | 584   | -.02      | .05    | <b>-.03</b>  | .0011   |                | (.06)      | (.03)       | (.05)        |     |
| DeRue et al. (2011)                | 4   | 635   | .16       | .09    | <b>.23</b>   | .0042   |                |            |             |              |     |

*Note.*  $k$  = number of independent samples,  $N$  = total sample size,  $\bar{r}$  = mean sample-size weighted observed correlation,  $SD_r$  = mean observed standard deviation,  $\bar{\rho}$  = estimated population correlation (bold) corrected for unreliability,  $VAR_2$  = second-order sampling error variance associated with each first-order meta-analytic correlation,  $\bar{\rho}_M$  = second-order, grand mean population correlation (bold) corrected for unreliability in the predictor and the criterion,  $VAR_{2M}$  = the mean observed variance and standard deviation (in parentheses) across first-order mean estimated population correlations, which includes corrections for first-order sampling error and measurement error,  $VAR_{2SE}$  = expected (mean) second-order sampling error variance and standard error (in parentheses),  $VAR_{True}$  = estimated residual (i.e., true) population variance and standard deviation (in parentheses) across first-order mean population correlation estimates after accounting for variance attributable to expected second-order sampling error and measurement error (negative values set to zero), % = percentage of observed variance across first-order mean population correlation estimates attributable to second-order sampling error and measurement error.

<sup>a</sup> To reduce biasing effects of first-order sampling error associated with the smaller  $k$  meta-analysis of Dilchert and Ones (2009), the  $SD_r$  from the meta-analysis with the largest  $k$  (i.e., Meriac et al., 2008) was imputed prior to second-order cumulation.

<sup>b</sup> Mean sample-size weighted observed correlation is a composite correlation. For details on composite formation, see the Supplemental Methods section.

<sup>c</sup>  $SD_r$  was neither reported nor calculable from the source meta-analysis; thus, an estimate of variance due to sampling error is reported instead.

<sup>d</sup> Data from two studies (i.e., Judge & Bono, 2000; Monroe, 1997) was included in multiple meta-analyses. Because both Dienert et al. (2015) and Banks et al. (2017) provided full data, overlapping studies were removed and first-order meta-analyses were rerun prior to second-order cumulation.

Table S12

## Second-Order Meta-Analyses of C and Attitudes and Well-Being Variables

| Variable                    | <i>k</i> | <i>N</i> | $\bar{r}$ | $SD_r$           | $\bar{\rho}$ | $VAR_2$ | $\bar{\rho}_M$ | $VAR_{2M}$ | $VAR_{2SE}$ | $VAR_{True}$ | %   |
|-----------------------------|----------|----------|-----------|------------------|--------------|---------|----------------|------------|-------------|--------------|-----|
| <b>Job Application</b>      |          |          |           |                  |              |         |                |            |             |              |     |
| Assessment center dimension |          |          |           |                  |              |         |                |            |             |              |     |
| Stress tolerance            |          |          |           |                  |              |         |                |            |             |              |     |
| Dilchert & Ones (2009)      | 2        | 4,776    | .16       | .12 <sup>a</sup> | <b>.20</b>   | .0113   | <b>.17</b>     | .0004      | .0059       | -.0055       | 100 |
| Meriac et al. (2008)        | 3        | 310      | .12       | .12              | <b>.15</b>   | .0075   |                | (.02)      | (.08)       | (.00)        |     |
| <b>On the Job</b>           |          |          |           |                  |              |         |                |            |             |              |     |
| Job satisfaction            |          |          |           |                  |              |         |                |            |             |              |     |
| Judge et al. (2002b)        | 79       | 21,719   | .20       | .18              | <b>.25</b>   | .0006   | <b>.23</b>     | .0001      | .0004       | -.0003       | 100 |
| Seltzer et al. (2017)       | 23       | 2,336    | .18       | .10              | <b>.22</b>   | .0006   |                | (.01)      | (.02)       | (.00)        |     |
| Turnover intentions         |          |          |           |                  |              |         |                |            |             |              |     |
| Harari et al. (2018)        | 7        | 850      | .01       | .14              | <b>.01</b>   | .0028   | <b>-.13</b>    | .0021      | .0008       | .0013        | 37  |
| Zimmerman (2008)            | 13       | 4,315    | -.12      | .08              | <b>-.15</b>  | .0008   |                | (.05)      | (.03)       | (.04)        |     |
| Burnout                     |          |          |           |                  |              |         |                |            |             |              |     |
| Emotional exhaustion        |          |          |           |                  |              |         |                |            |             |              |     |
| Swider & Zimmerman (2010)   | 36       | 8,924    | -.16      | .13              | <b>-.19</b>  | .0007   | <b>-.17</b>    | .0004      | .0005       | -.0002       | 100 |
| You et al. (2015)           | 19       | 6,834    | -.12      | .11              | <b>-.14</b>  | .0009   |                | (.02)      | (.02)       | (.00)        |     |
| Depersonalization           |          |          |           |                  |              |         |                |            |             |              |     |
| Swider & Zimmerman (2010)   | 34       | 7,485    | -.19      | .15              | <b>-.25</b>  | .0011   | <b>-.26</b>    | .0001      | .0008       | -.0007       | 100 |
| You et al. (2015)           | 19       | 6,834    | -.21      | .15              | <b>-.27</b>  | .0020   |                | (.01)      | (.03)       | (.00)        |     |
| Personal accomplishment     |          |          |           |                  |              |         |                |            |             |              |     |
| Swider & Zimmerman (2010)   | 32       | 5,690    | .22       | .17              | <b>.28</b>   | .0015   | <b>.35</b>     | .0020      | .0008       | .0012        | 41  |
| You et al. (2015)           | 19       | 6,834    | .31       | .12              | <b>.40</b>   | .0013   |                | (.04)      | (.03)       | (.03)        |     |
| <b>Career/Lifespan</b>      |          |          |           |                  |              |         |                |            |             |              |     |
| Life satisfaction           |          |          |           |                  |              |         |                |            |             |              |     |
| Seltzer et al. (2017)       | 21       | 1,618    | .14       | .12              | <b>.17</b>   | .0010   | <b>.24</b>     | .0014      | .0004       | .0010        | 30  |
| Steel et al. (2008)         | 25       | 6,685    | .22       | .09              | <b>.27</b>   | .0005   |                | (.04)      | (.02)       | (.03)        |     |

Note. *k* = number of independent samples, *N* = total sample size,  $\bar{r}$  = mean sample-size weighted observed correlation,  $SD_r$  = mean observed standard deviation,  $\bar{\rho}$  = estimated population correlation (bold) corrected for unreliability,  $VAR_2$  = second-order sampling error variance associated with each first-order meta-

analytic correlation,  $\bar{\rho}_M$  = second-order, grand mean population correlation (bold) corrected for unreliability in the predictor and the criterion,  $VAR_{2M}$  = the mean observed variance and standard deviation (in parentheses) across first-order mean estimated population correlations, which includes corrections for first-order sampling error and measurement error,  $VAR_{2SE}$  = expected (mean) second-order sampling error variance and standard error (in parentheses),  $VAR_{True}$  = estimated residual (i.e., true) population variance and standard deviation (in parentheses) across first-order mean population correlation estimates after accounting for variance attributable to expected second-order sampling error and measurement error (negative values set to zero), % = percentage of observed variance across first-order mean population correlation estimates attributable to second-order sampling error and measurement error.

<sup>a</sup> To reduce biasing effects of first-order sampling error associated with the smaller  $k$  meta-analysis of Dilchert and Ones (2009), the  $SD_r$  from the meta-analysis with the largest  $k$  (i.e., Meriac et al., 2008) was imputed prior to second-order cumulation.

**Table S13**  
**Second-Order Meta-Analyses of C and Counterproductivity Variables**

| Variable                                 | <i>k</i> | <i>N</i> | $\bar{r}$ | $SD_r$           | $\bar{\rho}$ | $VAR_2$ | $\bar{\rho}_M$ | $VAR_{2M}$ | $VAR_{2SE}$ | $VAR_{True}$ | %  |
|------------------------------------------|----------|----------|-----------|------------------|--------------|---------|----------------|------------|-------------|--------------|----|
| <b>On the Job</b>                        |          |          |           |                  |              |         |                |            |             |              |    |
| Counterproductive work behavior: Overall |          |          |           |                  |              |         |                |            |             |              |    |
| Carpenter & Berry (2017)                 | 11       | 2,755    | -.20      | .18              | <b>-.26</b>  | .0050   | <b>-.22</b>    | .0065      | .0034       | .0031        | 53 |
| Darr (2011)                              | 4        | 1,427    | -.19      | .09              | <b>-.24</b>  | .0032   |                | (.08)      | (.06)       | (.06)        |    |
| van Aarde et al. (2017)                  | 2        | 168      | .12       | .18 <sup>a</sup> | <b>.15</b>   | .0253   |                |            |             |              |    |
| <b>Career/Lifespan</b>                   |          |          |           |                  |              |         |                |            |             |              |    |
| Antisocial behavior                      |          |          |           |                  |              |         |                |            |             |              |    |
| Jones et al. (2011)                      | 30       | 10,308   | -.23      | .05              | <b>-.28</b>  | .0001   | <b>-.29</b>    | .0001      | .0001       | .0000        | 99 |
| Miller & Lynam (2001)                    | 14       | 4,584    | -.25      | .04              | <b>-.31</b>  | .0002   |                | (.01)      | (.01)       | (.00)        |    |

*Note.* *k* = number of independent samples, *N* = total sample size,  $\bar{r}$  = mean sample-size weighted observed correlation,  $SD_r$  = mean observed standard deviation,  $\bar{\rho}$  = estimated population correlation (bold) corrected for unreliability,  $VAR_2$  = second-order sampling error variance associated with each first-order meta-analytic correlation,  $\bar{\rho}_M$  = second-order, grand mean population correlation (bold) corrected for unreliability in the predictor and the criterion,  $VAR_{2M}$  = the mean observed variance and standard deviation (in parentheses) across first-order mean estimated population correlations, which includes corrections for first-order sampling error and measurement error,  $VAR_{2SE}$  = expected (mean) second-order sampling error variance and standard error (in parentheses),  $VAR_{True}$  = estimated residual (i.e., true) population variance and standard deviation (in parentheses) across first-order mean population correlation estimates after accounting for variance attributable to expected second-order sampling error and measurement error (negative values set to zero), % = percentage of observed variance across first-order mean population correlation estimates attributable to second-order sampling error and measurement error.

<sup>a</sup> To reduce biasing effects of first-order sampling error associated with the smaller *k* meta-analysis of van Aarde et al. (2017), the  $SD_r$  from the meta-analysis with the largest *k* (i.e., Carpenter & Berry, 2017) was imputed prior to second-order cumulation.



**Table S14**  
**Second-Order Meta-Analyses of C and Performance Variables**

| Variable                            | <i>k</i> | <i>N</i> | $\bar{r}$        | $SD_r$           | $\bar{\rho}$ | $VAR_2$ | $\bar{\rho}_M$ | $VAR_{2M}$ | $VAR_{2SE}$ | $VAR_{True}$ | %   |
|-------------------------------------|----------|----------|------------------|------------------|--------------|---------|----------------|------------|-------------|--------------|-----|
| <b>Education</b>                    |          |          |                  |                  |              |         |                |            |             |              |     |
| Academic performance: Postsecondary |          |          |                  |                  |              |         |                |            |             |              |     |
| McAbee & Oswald (2013)              | 57       | 26,382   | .22              | .05              | <b>.25</b>   | .0001   | <b>.24</b>     | .0009      | .0001       | .0007        | 17  |
| Salgado & Táuriz (2014)             | 25       | 6,314    | .12              | .10              | <b>.14</b>   | .0005   |                | (.03)      | (.01)       | (.03)        |     |
| Stajkovic et al. (2018)             | 5        | 875      | .23              | .08              | <b>.26</b>   | .0016   |                |            |             |              |     |
| van Aarde et al. (2017)             | 4        | 1,464    | .18              | .08              | <b>.20</b>   | .0020   |                |            |             |              |     |
| Training performance                |          |          |                  |                  |              |         |                |            |             |              |     |
| Barrick & Mount (1991)              | 17       | 3,585    | .13              | .11              | <b>.16</b>   | .0011   | <b>.16</b>     | .0006      | .0008       | -.0002       | 100 |
| Darr (2011)                         | 12       | 2,744    | .12              | .06              | <b>.15</b>   | .0005   |                | (.02)      | (.03)       | (.00)        |     |
| Hurtz & Donovan (2000)              | 3        | 741      | .02              | .12              | <b>.03</b>   | .0108   |                |            |             |              |     |
| Salgado (1997)                      | 3        | 324      | .15              | .04              | <b>.09</b>   | .0002   |                |            |             |              |     |
| Salgado & Táuriz (2014)             | 10       | 2,510    | .10              | .10              | <b>.13</b>   | .0017   |                |            |             |              |     |
| van Aarde et al. (2017)             | 2        | 511      | .16              | .12 <sup>f</sup> | <b>.20</b>   | .0113   |                |            |             |              |     |
| Training success                    |          |          |                  |                  |              |         |                |            |             |              |     |
| Blume et al. (2010)                 | 5        | 433      | .23              | .12              | <b>.29</b>   | .0046   | <b>.25</b>     | .0002      | .0007       | -.0005       | 100 |
| Hough (1992)                        | 22       | 2,935    | .19 <sup>a</sup> | .09 <sup>b</sup> | <b>.24</b>   | .0006   |                | (.01)      | (.03)       | (.00)        |     |
| <b>Job Application</b>              |          |          |                  |                  |              |         |                |            |             |              |     |
| Assessment center dimension         |          |          |                  |                  |              |         |                |            |             |              |     |
| Organizing and planning             |          |          |                  |                  |              |         |                |            |             |              |     |
| Dilchert & Ones (2009)              | 2        | 4,778    | .24              | .08 <sup>g</sup> | <b>.29</b>   | .0064   | <b>.11</b>     | .0062      | .0014       | .0048        | 23  |
| Meriac et al. (2008)                | 7        | 1,416    | .05              | .08              | <b>.06</b>   | .0013   |                | (.08)      | (.04)       | (.07)        |     |
| Problem solving                     |          |          |                  |                  |              |         |                |            |             |              |     |
| Dilchert & Ones (2009)              | 2        | 4,778    | -.05             | .10 <sup>g</sup> | <b>-.06</b>  | .0072   | <b>.10</b>     | .0061      | .0025       | .0036        | 41  |
| Meriac et al. (2008)                | 6        | 819      | .13              | .10              | <b>.15</b>   | .0022   |                | (.08)      | (.05)       | (.06)        |     |
| <b>On the Job</b>                   |          |          |                  |                  |              |         |                |            |             |              |     |
| Occupational performance            |          |          |                  |                  |              |         |                |            |             |              |     |
| Barrick & Mount (1991)              | 123      | 19,721   | .13              | .10              | <b>.19</b>   | .0002   | <b>.18</b>     | .0006      | .0002       | .0005        | 32  |
| Hurtz & Donovan (2000)              | 45       | 8,083    | .14              | .13              | <b>.20</b>   | .0008   |                | (.03)      | (.02)       | (.02)        |     |

| Variable                                                        | <i>k</i> | <i>N</i> | $\bar{r}$        | <i>SD<sub>r</sub></i> | $\bar{\rho}$ | <i>VAR<sub>2</sub></i> | $\bar{\rho}_M$ | <i>VAR<sub>2M</sub></i> | <i>VAR<sub>2SE</sub></i> | <i>VAR<sub>True</sub></i> | %   |
|-----------------------------------------------------------------|----------|----------|------------------|-----------------------|--------------|------------------------|----------------|-------------------------|--------------------------|---------------------------|-----|
| Salgado (1997) <sup>c</sup>                                     | 24       | 3,295    | .10              | .11                   | <b>.14</b>   | .0010                  |                |                         |                          |                           |     |
| Salgado & Táuriz (2014)                                         | 93       | 19,525   | .14              | .12                   | <b>.20</b>   | .0003                  |                |                         |                          |                           |     |
| van Aarde et al. (2017)                                         | 11       | 2,313    | .04              | .08                   | <b>.06</b>   | .0013                  |                |                         |                          |                           |     |
| Overall job performance                                         |          |          |                  |                       |              |                        |                |                         |                          |                           |     |
| Darr (2011)                                                     | 6        | 1,774    | .23              | .06                   | <b>.36</b>   | .0015                  | <b>.27</b>     | .0019                   | .0002                    | .0017                     | 10  |
| Hogan & Holland (2003): "Getting along and ahead" performance   | 43       | 5,242    | .14              | .13                   | <b>.22</b>   | .0010                  |                | (.04)                   | (.01)                    | (.04)                     |     |
| Judge et al. (2013)                                             | 74       | 41,939   | .21              | .08                   | <b>.33</b>   | .0002                  |                |                         |                          |                           |     |
| Salgado & Táuriz (2014) <sup>d</sup>                            | 56       | 12,147   | .11              | .09                   | <b>.17</b>   | .0003                  |                |                         |                          |                           |     |
| Schmidt & Oh (2013):                                            |          |          |                  |                       |              |                        |                |                         |                          |                           |     |
| Chinese                                                         | 3        | 353      | .17              | .15                   | <b>.27</b>   | .0189                  |                |                         |                          |                           |     |
| Korean                                                          | 14       | 3,447    | .13              | .07                   | <b>.20</b>   | .0008                  |                |                         |                          |                           |     |
| Singaporean                                                     | 3        | 1,723    | .14              | .04                   | <b>.22</b>   | .0013                  |                |                         |                          |                           |     |
| Taiwanese                                                       | 3        | 475      | .26              | .12                   | <b>.41</b>   | .0119                  |                |                         |                          |                           |     |
| Shaffer & Postlethwaite (2012): Workplace measures <sup>e</sup> | 37       | 6,177    | .19              | .04                   | <b>.30</b>   | .0001                  |                |                         |                          |                           |     |
| van Aarde et al. (2017)                                         | 9        | 1,558    | .02              | .08                   | <b>.03</b>   | .0016                  |                |                         |                          |                           |     |
| Technical performance                                           |          |          |                  |                       |              |                        |                |                         |                          |                           |     |
| Hogan & Holland (2003): "Getting ahead" performance             | 42       | 5,017    | .12              | .14                   | <b>.15</b>   | .0007                  | <b>.23</b>     | .0006                   | .0002                    | .0004                     | 34  |
| Judge et al. (2013)                                             | 102      | 47,729   | .19              | .10                   | <b>.24</b>   | .0002                  |                | (.03)                   | (.01)                    | (.02)                     |     |
| van Aarde et al. (2017)                                         | 8        | 1,254    | .18              | .15                   | <b>.23</b>   | .0046                  |                |                         |                          |                           |     |
| Contextual performance                                          |          |          |                  |                       |              |                        |                |                         |                          |                           |     |
| Judge et al. (2013)                                             | 39       | 24,034   | .25              | .09                   | <b>.34</b>   | .0004                  | <b>.33</b>     | .0012                   | .0004                    | .0008                     | 36  |
| van Aarde et al. (2017)                                         | 2        | 248      | .09              | .09 <sup>h</sup>      | <b>.12</b>   | .0081                  |                | (.03)                   | (.02)                    | (.03)                     |     |
| Adaptive performance                                            |          |          |                  |                       |              |                        |                |                         |                          |                           |     |
| Huang et al. (2014)                                             | 71       | 7,535    | .07              | .13                   | <b>.09</b>   | .0004                  | <b>.10</b>     | .0004                   | .0004                    | .0000                     | 97  |
| Huang et al. (2014): Appendix A                                 | 8        | 2,414    | .13              | .11                   | <b>.17</b>   | .0026                  |                | (.02)                   | (.02)                    | (.00)                     |     |
| Creativity                                                      |          |          |                  |                       |              |                        |                |                         |                          |                           |     |
| Hough (1992)                                                    | 4        | 192      | .04 <sup>a</sup> | .15 <sup>b</sup>      | <b>.06</b>   | .0127                  | <b>.08</b>     | .0000                   | .0001                    | -.0000                    | 100 |
| Puryear et al. (2017)                                           | 52       | 16,496   | .06              | .06                   | <b>.08</b>   | .0001                  |                | (.00)                   | (.01)                    | (.00)                     |     |

| Variable                | $k$ | $N$   | $\bar{r}$ | $SD_r$ | $\bar{\rho}$ | $VAR_2$ | $\bar{\rho}_M$ | $VAR_{2M}$ | $VAR_{2SE}$ | $VAR_{True}$ | %  |
|-------------------------|-----|-------|-----------|--------|--------------|---------|----------------|------------|-------------|--------------|----|
| <b>Career/Lifespan</b>  |     |       |           |        |              |         |                |            |             |              |    |
| Personnel data          |     |       |           |        |              |         |                |            |             |              |    |
| Barrick & Mount (1991)  | 32  | 6,175 | .11       | .11    | <b>.16</b>   | .0008   | <b>.14</b>     | .0007      | .0006       | .0001        | 88 |
| Salgado (1997)          | 3   | 730   | .05       | .06    | <b>.07</b>   | .0024   |                | (.03)      | (.02)       | (.01)        |    |
| Productivity            |     |       |           |        |              |         |                |            |             |              |    |
| Barrick & Mount (1991)  | 14  | 1,639 | .10       | .09    | <b>.12</b>   | .0008   | <b>.17</b>     | .0022      | .0006       | .0016        | 28 |
| Salgado & Táuriz (2014) | 9   | 1,074 | .18       | .06    | <b>.22</b>   | .0006   |                | (.05)      | (.02)       | (.04)        |    |
| van Aarde et al. (2017) | 5   | 716   | .06       | .09    | <b>.07</b>   | .0022   |                |            |             |              |    |

*Note.*  $k$  = number of independent samples,  $N$  = total sample size,  $\bar{r}$  = mean sample-size weighted observed correlation,  $SD_r$  = mean observed standard deviation,  $\bar{\rho}$  = estimated population correlation (bold) corrected for unreliability,  $VAR_2$  = second-order sampling error variance associated with each first-order meta-analytic correlation,  $\bar{\rho}_M$  = second-order, grand mean population correlation (bold) corrected for unreliability in the predictor and the criterion,  $VAR_{2M}$  = the mean observed variance and standard deviation (in parentheses) across first-order mean estimated population correlations, which includes corrections for first-order sampling error and measurement error,  $VAR_{2SE}$  = expected (mean) second-order sampling error variance and standard error (in parentheses),  $VAR_{True}$  = estimated residual (i.e., true) population variance and standard deviation (in parentheses) across first-order mean population correlation estimates after accounting for variance attributable to expected second-order sampling error and measurement error (negative values set to zero), % = percentage of observed variance across first-order mean population correlation estimates attributable to second-order sampling error and measurement error.

<sup>a</sup> Mean sample-size weighted observed correlation is a composite correlation. For details on composite formation, see the Supplemental Methods section.

<sup>b</sup>  $SD_r$  was neither reported nor calculable from the source meta-analysis; thus, an estimate of variance due to sampling error is reported instead.

<sup>c</sup> Data from three studies (i.e., Furnham, 1994; Nyfield et al., 1995 Studies 1 and 2) were also included in the meta-analysis of Salgado (1997). However, because Salgado & Táuriz (2014) provided full data, overlapping studies were removed and first-order meta-analyses were rerun, prior to second-order cumulation.

<sup>d</sup> Data from six studies (i.e., Adkins & Naumann, 2001; Furnham & Stringfield, 1993 Studies 1 and 2; Sackett et al., 1998; and Slocum & Hand, 1971 Studies 1 and 2) were also included in the meta-analysis of Judge et al. (2013). However, because both studies provided full data, overlapping studies were removed and first-order meta-analyses were rerun, prior to second-order cumulation.

<sup>e</sup> Data from Shaffer and Postlethwaite (2012) are reported under scale type moderator, “Workplace” (p. 458-9, final rows).

<sup>f</sup> To reduce biasing effects of first-order sampling error associated with the smaller  $k$  meta-analysis of van Aarde et al. (2017), the  $SD_r$  from the meta-analysis with the largest  $k$  (i.e., Hertz & Donovan, 2000) was imputed prior to second-order cumulation.

<sup>g</sup> To reduce biasing effects of first-order sampling error associated with the smaller  $k$  meta-analysis of Dilchert and Ones (2009), the  $SD_r$  from the meta-analysis with the largest  $k$  (i.e., Meriac et al., 2008) was imputed prior to second-order cumulation.

<sup>h</sup> To reduce biasing effects of first-order sampling error associated with the smaller  $k$  meta-analysis of van Aarde et al. (2017), the  $SD_r$  from the meta-analysis with the largest  $k$  (i.e., Judge et al., 2013) was imputed prior to second-order cumulation.

Table S15

## Second-Order Meta-Analyses of C and Occupational Performance across Occupations

| Variable                              | <i>k</i> | <i>N</i> | $\bar{r}$ | $SD_r$           | $\bar{\rho}$ | $VAR_2$ | $\bar{\rho}_M$ | $VAR_{2M}$ | $VAR_{2SE}$ | $VAR_{True}$ | %   |
|---------------------------------------|----------|----------|-----------|------------------|--------------|---------|----------------|------------|-------------|--------------|-----|
| <b>Low Complexity</b>                 |          |          |           |                  |              |         |                |            |             |              |     |
| Skilled/Semi-Skilled                  |          |          |           |                  |              |         |                |            |             |              |     |
| Barrick & Mount (1991)                | 25       | 4,588    | .12       | .09              | <b>.17</b>   | .0007   | <b>.21</b>     | .0099      | .0010       | .0089        | 10  |
| Hurtz & Donovan (2000)                | 14       | 3,481    | .10       | .12              | <b>.14</b>   | .0020   |                | (.10)      | (.03)       | (.09)        |     |
| Salgado (1997): European              | 8        | 1,264    | .09       | .09              | <b>.13</b>   | .0021   |                |            |             |              |     |
| Salgado et al. (2015):                |          |          |           |                  |              |         |                |            |             |              |     |
| Skilled - Quasi-ipsative              | 8        | 2,338    | .43       | .12 <sup>a</sup> | <b>.62</b>   | .0010   |                |            |             |              |     |
| Clerical - Quasi-ipsative             | 3        | 357      | .16       | .09              | <b>.23</b>   | .0056   |                |            |             |              |     |
| <b>Moderate Complexity</b>            |          |          |           |                  |              |         |                |            |             |              |     |
| Sales                                 |          |          |           |                  |              |         |                |            |             |              |     |
| Barrick & Mount (1991)                | 21       | 2,263    | .09       | .10              | <b>.13</b>   | .0010   | <b>.23</b>     | .0033      | .0007       | .0026        | 20  |
| Hurtz & Donovan (2000)                | 10       | 1,369    | .18       | .11              | <b>.26</b>   | .0025   |                | (.06)      | (.03)       | (.05)        |     |
| Salgado (1997): European              | 6        | 576      | .08       | .10 <sup>b</sup> | <b>.12</b>   | .0035   |                |            |             |              |     |
| Salgado et al. (2015): Ipsative       | 5        | 665      | .18       | .06              | <b>.26</b>   | .0015   |                |            |             |              |     |
| Salgado et al. (2015): Quasi-ipsative | 4        | 472      | .22       | .04              | <b>.32</b>   | .0008   |                |            |             |              |     |
| Military                              |          |          |           |                  |              |         |                |            |             |              |     |
| Darr (2011)                           | 6        | 1,774    | .23       | .06              | <b>.33</b>   | .0012   | <b>.25</b>     | .0029      | .0008       | .0021        | 27  |
| Hough (1992)                          | 3        | 895      | .12       | .06              | <b>.18</b>   | .0027   |                | (.05)      | (.03)       | (.05)        |     |
| Salgado et al. (2015): Quasi-ipsative | 10       | 3,007    | .12       | .10              | <b>.17</b>   | .0020   |                |            |             |              |     |
| Health Care                           |          |          |           |                  |              |         |                |            |             |              |     |
| Hough (1992)                          | 15       | 758      | .24       | .14              | <b>.35</b>   | .0028   | <b>.33</b>     | .0002      | .0018       | -.0016       | 100 |
| Salgado et al. (2015): Quasi-ipsative | 3        | 773      | .21       | .09              | <b>.30</b>   | .0055   |                | (.01)      | (.04)       | (.00)        |     |
| Customer Service                      |          |          |           |                  |              |         |                |            |             |              |     |
| Hurtz & Donovan (2000)                | 12       | 1,849    | .17       | .11              | <b>.25</b>   | .0022   | <b>.23</b>     | .0021      | .0015       | .0006        | 71  |
| Salgado et al. (2015): Ipsative       | 3        | 551      | .12       | .06              | <b>.17</b>   | .0024   |                | (.05)      | (.04)       | (.02)        |     |
| Salgado et al. (2015): Quasi-ipsative | 2        | 398      | .29       | .11 <sup>c</sup> | <b>.42</b>   | .0037   |                |            |             |              |     |

| Variable                            | $k$ | $N$    | $\bar{r}$ | $SD_r$ | $\bar{\rho}$ | $VAR_2$ | $\bar{\rho}_M$ | $VAR_{2M}$ | $VAR_{2SE}$ | $VAR_{True}$ | %   |
|-------------------------------------|-----|--------|-----------|--------|--------------|---------|----------------|------------|-------------|--------------|-----|
| <b>Police</b>                       |     |        |           |        |              |         |                |            |             |              |     |
| Barrick & Mount (1991)              | 19  | 2,045  | .13       | .16    | <b>.19</b>   | .0029   | <b>.20</b>     | .0005      | .0012       | -.0007       | 100 |
| Salgado (1997): European            | 3   | 324    | .15       | .04    | <b>.22</b>   | .0011   |                | (.02)      | (.03)       | (.00)        |     |
| Salgado et al. (2015): Ipsative     | 3   | 700    | .07       | .12    | <b>.10</b>   | .0098   |                |            |             |              |     |
| <b>High Complexity</b>              |     |        |           |        |              |         |                |            |             |              |     |
| <b>Managerial</b>                   |     |        |           |        |              |         |                |            |             |              |     |
| Barrick & Mount (1991)              | 52  | 10,058 | .13       | .10    | <b>.19</b>   | .0004   | <b>.15</b>     | .0006      | .0007       | -.0001       | 100 |
| Hurtz & Donovan (2000)              | 4   | 495    | .11       | .21    | <b>.16</b>   | .0233   |                | (.02)      | (.03)       | (.00)        |     |
| Salgado (1997): European            | 6   | 987    | .06       | .09    | <b>.09</b>   | .0030   |                |            |             |              |     |
| Salgado et al. (2015):              |     |        |           |        |              |         |                |            |             |              |     |
| Managerial - Ipsative               | 21  | 4,401  | .08       | .10    | <b>.12</b>   | .0011   |                |            |             |              |     |
| Managerial - Normative              | 6   | 2,560  | .09       | .07    | <b>.13</b>   | .0017   |                |            |             |              |     |
| Managerial - Quasi-ipsative         | 9   | 1,132  | .10       | .09    | <b>.14</b>   | .0018   |                |            |             |              |     |
| Supervisory - Ipsative              | 4   | 423    | .08       | .09    | <b>.12</b>   | .0046   |                |            |             |              |     |
| Supervisory - Quasi-ipsative        | 3   | 171    | .09       | .10    | <b>.13</b>   | .0070   |                |            |             |              |     |
| <b>Professional</b>                 |     |        |           |        |              |         |                |            |             |              |     |
| Barrick & Mount (1991)              | 6   | 767    | .11       | .09    | <b>.16</b>   | .0029   | <b>.13</b>     | .0003      | .0002       | .0001        | 76  |
| Gnambs (2015): Computer programming | 26  | 1,224  | .08       | .04    | <b>.12</b>   | .0001   |                | (.02)      | (.02)       | (.01)        |     |
| Klassen & Tze (2014): Teachers      | 6   | 1,033  | .09       | .10    | <b>.13</b>   | .0035   |                |            |             |              |     |
| Mol et al. (2005): Expatriates      | 8   | 621    | .17       | .11    | <b>.25</b>   | .0033   |                |            |             |              |     |
| Zhao et al. (2010): Entrepreneurs   | 24  | 3,193  | .15       | .24    | <b>.22</b>   | .0052   |                |            |             |              |     |

*Note.*  $k$  = number of independent samples,  $N$  = total sample size,  $\bar{r}$  = mean sample-size weighted observed correlation,  $SD_r$  = mean observed standard deviation,  $\bar{\rho}$  = estimated population correlation (bold) corrected for unreliability,  $VAR_2$  = second-order sampling error variance associated with each first-order meta-analytic correlation,  $\bar{\rho}_M$  = second-order, grand mean population correlation (bold) corrected for unreliability in the predictor and the criterion,  $VAR_{2M}$  = the mean observed variance and standard deviation (in parentheses) across first-order mean estimated population correlations, which includes corrections for first-order sampling error and measurement error,  $VAR_{2SE}$  = expected (mean) second-order sampling error variance and standard error (in parentheses),  $VAR_{True}$  = estimated residual (i.e., true) population variance and standard deviation (in parentheses) across first-order mean population correlation estimates after accounting for variance attributable to expected second-order sampling error and measurement error (negative values set to zero), % = percentage of observed variance across first-order mean population correlation estimates attributable to second-order sampling error and measurement error.

<sup>a</sup> To reduce biasing effects of the outlying meta-analytic effect of Salgado et al. (2015; Quasi-ipsative), the  $SD_r$  from the meta-analysis with the largest  $k$  (i.e., Hurtz & Donovan, 2000) was imputed prior to second-order cumulation.

<sup>b</sup> To reduce biasing effects of the outlying meta-analytic variance of Salgado (1997), the  $SD_r$  from the meta-analysis with the largest variance (i.e., Barrick & Mount, 1991) was imputed prior to second-order cumulation.

<sup>c</sup> To reduce biasing effects of first-order sampling error associated with the smaller  $k$  meta-analysis of Salgado et al. (2015; Quasi-ipsative), the  $SD_r$  from the meta-analysis with the largest  $k$  (i.e., Hertz & Donovan, 2000) was imputed prior to second-order cumulation.

Table S16

**Description of Evaluations of Publication Bias and Sensitivity Analyses for First-Order  
Meta-Analyses of C and Occupational Variables**

| Column                                      | Description                                                                                                                                                                                                                                                                                                                                 |
|---------------------------------------------|---------------------------------------------------------------------------------------------------------------------------------------------------------------------------------------------------------------------------------------------------------------------------------------------------------------------------------------------|
| <b>Descriptive statistics</b>               |                                                                                                                                                                                                                                                                                                                                             |
| (1)                                         | Reference number for meta-analysis                                                                                                                                                                                                                                                                                                          |
| (2)                                         | Year of publication for meta-analysis                                                                                                                                                                                                                                                                                                       |
| (3)                                         | Total number of sources contributing to meta-analysis, whether pertaining to C or not                                                                                                                                                                                                                                                       |
| (4)                                         | Total number of studies (i.e., $k$ ) pertaining to C in meta-analysis                                                                                                                                                                                                                                                                       |
| (5)                                         | Total number of occupational variables reporting meta-analytic relations to C, whether included in review or not                                                                                                                                                                                                                            |
| <b>Post hoc and preventative approaches</b> |                                                                                                                                                                                                                                                                                                                                             |
| (6)                                         | Publication bias analyses reported (if blank, no analysis reported):<br>PB1 = Failsafe $N$ ; PB2 = Cumulative meta-analysis; PB3 = Funnel plot or similar analysis; PB4 = Egger's test of intercept or similar; PB5 = Begg and Mazumdar rank correlation; PB6 = Correlation with publication status; PB7 = Forest plot                      |
| (7)                                         | Sensitivity analyses reported (if blank, no analysis reported):<br>SA1 = Outlier analyses; SA2 = Duval and Tweedie's trim-and-fill or similar; SA3 = Comparison of published versus unpublished effects                                                                                                                                     |
| (8)                                         | Conclusion about publication bias (i.e., none, negligible, small; NM = Not mentioned)                                                                                                                                                                                                                                                       |
| (9)                                         | Magnitude of publication bias in correlational points<br>AFA = Analyses available from author; UL = Unpublished effects larger                                                                                                                                                                                                              |
| (10)                                        | Publication bias and/or approaches to addressing it are discussed ( $Y = 1, N = 0$ )                                                                                                                                                                                                                                                        |
| (11)                                        | Percentage of unpublished studies cumulated in meta-analysis (out of 1.0)                                                                                                                                                                                                                                                                   |
| <b>Centrality considerations</b>            |                                                                                                                                                                                                                                                                                                                                             |
| (12)                                        | Personality constructs are of central consideration to the meta-analysis ( $Y = 1, N = 0$ )                                                                                                                                                                                                                                                 |
| (13)                                        | Meta-analysis includes C as the only personality construct ( $Y = 1, N = 0$ )                                                                                                                                                                                                                                                               |
| (14)                                        | Meta-analysis includes all Big Five traits ( $Y = 1, N = 0$ )                                                                                                                                                                                                                                                                               |
| (15)                                        | Personality constructs other than the Big Five traits that are included in meta-analysis:<br>FAC = Big Five facet(s); CSE = Core self-evaluations; GSE = General self-efficacy; LOC = Locus of control; NA = Negative affect; PA = Positive affect; PRO = Proactive personality; SE = Self-esteem; MISC = Miscellaneous construct or model. |

*Note.* For all columns (except for column 15), *NR* = Not reported; and *NA* = Not applicable.

Table S17

## Evaluations of Publication Bias and Sensitivity Analyses for First-Order Meta-Analyses of C and Occupational Variables

| Descriptive statistics |      |     |     |     | Post hoc and preventative approaches |             |      |     |      |      | Centrality considerations |      |      |                                    |
|------------------------|------|-----|-----|-----|--------------------------------------|-------------|------|-----|------|------|---------------------------|------|------|------------------------------------|
| (1)                    | (2)  | (3) | (4) | (5) | (6)                                  | (7)         | (8)  | (9) | (10) | (11) | (12)                      | (13) | (14) | (15)                               |
| 1                      | 2017 | 62  | 36  | 1   | PB6                                  | SA1,<br>SA2 | None | .00 | 1    | .00  | 1                         | 0    | 1    |                                    |
| 2                      | 2012 | 68  | 35  | 2   |                                      |             | NM   |     | 0    | .35  | 1                         | 0    | 1    | LOC, NA, PA                        |
| 3                      | 2017 | 76  | 33  | 6   | PB2                                  | SA2         | None | NR  | 1    | .30  | 1                         | 0    | 1    |                                    |
| 4                      | 1991 | 117 | 573 | 15  |                                      |             | NM   |     | 0    | .31  | 1                         | 0    | 1    |                                    |
| 5                      | 2012 | 40  | 13  | 1   |                                      |             | NM   |     | 0    | .38  | 0                         | 0    | 1    |                                    |
| 6                      | 2007 | 30  | 27  | 3   |                                      |             | NM   |     | 1    | .53  | 0                         | 0    | 1    |                                    |
| 7                      | 2015 | 69  | 30  | 3   |                                      |             | NM   |     | 0    | .14  | 1                         | 0    | 1    |                                    |
| 8                      | 2012 | 21  | 10  | 2   |                                      |             | NM   |     | 0    | .14  | 0                         | 0    | 1    |                                    |
| 9                      | 2006 | 25  | 27  | 1   |                                      |             | NM   |     | 1    | .18  | 1                         | 0    | 1    |                                    |
| 10                     | 2010 | 89  | 5   | 1   | PB1                                  | SA1,<br>SA3 | NM   |     | 1    | .35  | 0                         | 0    | 1    | LOC                                |
| 11                     | 2004 | 26  | 61  | 7   |                                      |             | NM   |     | 0    | .46  | 1                         | 0    | 1    |                                    |
| 12                     | 2017 | 45  | 32  | 4   |                                      | SA1         | NM   |     | 0    | .31  | 0                         | 0    | 1    |                                    |
| 13                     | 2017 | 166 | 24  | 3   |                                      |             | NM   |     | 1    | .16  | 0                         | 0    | 1    |                                    |
| 14                     | 2011 | 77  | 166 | 5   |                                      | SA3         | None | AFA | 1    | .43  | 1                         | 0    | 1    |                                    |
| 15                     | 2015 | 50  | 84  | 4   |                                      | SA2,<br>SA3 | None | UL  | 1    | .32  | 1                         | 0    | 1    | NA, PA                             |
| 16                     | 2016 | 89  | 5   | 1   |                                      | SA3         | NM   |     | 1    | .24  | 0                         | 0    | 1    |                                    |
| 17                     | 2001 | 71  | 22  | 2   |                                      | SA1         | NM   |     | 0    | .25  | 1                         | 0    | 0    | FAC                                |
| 18                     | 2008 | 228 | 9   | 2   |                                      |             | NM   |     | 0    | .38  | 0                         | 0    | 0    | FAC, LOC                           |
| 19                     | 2012 | 237 | 24  | 5   |                                      |             | NM   |     | 1    | NR   | 0                         | 0    | 1    | GSE, LOC, GSE,<br>NA, PA, SE, MISC |
| 20                     | 2010 | 68  | 6   | 1   |                                      |             | NM   |     | 0    | .24  | 0                         | 0    | 1    | CSE                                |
| 21                     | 2011 | 18  | 25  | 4   |                                      |             | NM   |     | 0    | .94  | 1                         | 0    | 1    |                                    |
| 22                     | 2015 | 58  | 44  | 6   |                                      |             | NM   |     | 1    | .09  | 1                         | 0    | 1    |                                    |
| 23                     | 2011 | 79  | 57  | 6   |                                      |             | NM   |     | 0    | .25  | 0                         | 0    | 1    |                                    |



| Descriptive statistics |      |     |     |     | Post hoc and preventative approaches |     |             |            |      |      | Centrality considerations |      |      |      |              |
|------------------------|------|-----|-----|-----|--------------------------------------|-----|-------------|------------|------|------|---------------------------|------|------|------|--------------|
| (1)                    | (2)  | (3) | (4) | (5) | (6)                                  | (7) | (8)         | (9)        | (10) | (11) | (12)                      | (13) | (14) | (15) |              |
| 24                     | 2009 | 2   | 18  | 9   |                                      |     | NA          | NA         | NA   | 1.00 | 1                         | 0    | 1    |      |              |
| 25                     | 2012 | 247 | 9   | 1   |                                      |     | NM          |            | 1    | .23  | 0                         | 0    | 1    | LOC  |              |
| 26                     | 2015 | 73  | 215 | 4   |                                      |     | SA1,<br>SA3 | None       | .01  | 1    | .23                       | 1    | 0    | 1    | MISC         |
| 27                     | 2015 | 29  | 16  | 1   |                                      |     | SA1         | NM         |      | 0    | .21                       | 1    | 0    | 1    | NA, PA       |
| 28                     | 2015 | 20  | 26  | 1   | PB3                                  |     | SA2         | Negligible | .02  | 1    | .45                       | 1    | 0    | 1    |              |
| 29                     | 2009 | 96  | 15  | 1   |                                      |     | SA1,<br>SA3 | None       | .02  | 1    | .03                       | 0    | 0    | 0    | LOC, MISC    |
| 30                     | 2018 | 43  | 67  | 5   | PB2, PB4                             |     | SA1,<br>SA2 | None       | NR   | 1    | .35                       | 1    | 0    | 1    |              |
| 31                     | 2015 | 21  | 18  | 1   | PB3                                  |     | SA3         | None       | UL   | 1    | .14                       | 1    | 0    | 1    |              |
| 32                     | 2004 | 72  | 13  | 2   | PB1                                  |     |             | NM         |      | 1    | .17                       | 0    | 0    | 0    | B5 ES        |
| 33                     | 2015 | 49  | 25  | 5   |                                      |     |             | NM         |      | 0    | .18                       | 0    | 0    | 1    |              |
| 34                     | 2003 | 43  | 222 | 9   |                                      |     |             | NM         |      | 0    | 1.00                      | 1    | 0    | 1    | MISC         |
| 35                     | 1992 | 237 | 354 | 14  |                                      |     |             | NM         |      | 0    | NR                        | 1    | 0    | 1    | FAC          |
| 36                     | 2017 | 40  | 78  | 4   |                                      |     |             | NM         |      | 0    | .43                       | 0    | 0    | 0    | B5 A         |
| 37                     | 2014 | 77  | 453 | 12  |                                      |     |             | NM         |      | 0    | .94                       | 1    | 0    | 1    | MISC         |
| 38 <sup>a</sup>        | 2000 | 26  | 182 | 10  | PB2 to<br>PB5, PB7                   |     | SA2         | Negligible | .03  | 1    | .15                       | 1    | 0    | 1    |              |
| 39                     | 2011 | 53  | 65  | 2   |                                      |     | SA1         | NM         |      | 0    | .19                       | 1    | 0    | 1    | FAC          |
| 40                     | 2015 | 151 | 38  | 2   |                                      |     | SA2         | None       | AFA  | 1    | .17                       | 0    | 0    | 1    | GSE          |
| 41                     | 2002 | 78  | 70  | 3   |                                      |     |             | NM         |      | 0    | .18                       | 1    | 0    | 1    | FAC, LOC, SE |
| 42                     | 2002 | 135 | 79  | 1   |                                      |     |             | NM         |      | 0    | .41                       | 1    | 0    | 1    |              |
| 43                     | 2002 | 69  | 43  | 3   |                                      |     | SA3         | Small      | .07  | 0    | .39                       | 1    | 0    | 1    |              |
| 44                     | 2013 | 264 | 215 | 3   |                                      |     |             | NM         |      | 0    | .00                       | 1    | 0    | 1    |              |
| 45                     | 2014 | 41  | 6   | 1   | PB1, PB3,<br>PB4, PB7                |     |             | None       |      | 1    | .71                       | 0    | 0    | 1    | GSE          |
| 46                     | 2012 | 97  | 18  | 2   |                                      |     | SA3         | None       | NR   | 1    | .32                       | 1    | 0    | 1    |              |
| 47                     | 2014 | NR  | 13  | 1   |                                      |     |             | NM         |      | 0    | NR                        | 1    | 0    | 1    |              |
| 48                     | 2017 | 112 | 12  | 1   |                                      |     | SA1,<br>SA3 | NM         |      | 1    | .10                       | 0    | 0    | 1    | NA, PA       |

| Descriptive statistics |      |     |     |     | Post hoc and preventative approaches |                     |             |      |      |      | Centrality considerations |      |      |                                             |                       |
|------------------------|------|-----|-----|-----|--------------------------------------|---------------------|-------------|------|------|------|---------------------------|------|------|---------------------------------------------|-----------------------|
| (1)                    | (2)  | (3) | (4) | (5) | (6)                                  | (7)                 | (8)         | (9)  | (10) | (11) | (12)                      | (13) | (14) | (15)                                        |                       |
| 49                     | 2015 | 23  | 18  | 1   | PB4, PB7                             |                     | None        |      | 1    | .09  | 1                         | 0    | 1    |                                             |                       |
| 50                     | 2013 | 51  | 57  | 5   |                                      |                     | SA1         | NM   |      | 0    | .00                       | 1    | 0    | 1                                           |                       |
| 51                     | 2007 | 86  | 53  | 4   |                                      | SA1,<br>SA2,<br>SA3 | None        |      | 1    | .28  | 0                         | 0    | 1    |                                             |                       |
| 52                     | 2017 | 54  | 11  | 1   |                                      | SA1                 | NM          |      | 1    | .22  | 0                         | 0    | 1    | FAC, GSE                                    |                       |
| 53                     | 2008 | 48  | 42  | 13  |                                      |                     | NM          |      | 0    | .52  | 0                         | 0    | 1    |                                             |                       |
| 54                     | 2011 | 66  | 23  | 2   |                                      |                     | NM          |      | 0    | .35  | 1                         | 0    | 1    | CSE, NA, PA                                 |                       |
| 55                     | 2001 | 43  | 14  | 1   | PB1                                  |                     | NM          |      | 1    | .07  | 1                         | 0    | 1    | MISC                                        |                       |
| 56                     | 2005 | 30  | 8   | 1   |                                      |                     |             | NM   |      | 0    | .40                       | 0    | 0    | 1                                           | MISC                  |
| 57                     | 2005 | 24  | 276 | 6   |                                      |                     | NM          |      | 0    | .33  | 1                         | 0    | 1    |                                             |                       |
| 58                     | 2010 | 395 | 94  | 4   |                                      |                     | NM          |      | 1    | .03  | 0                         | 1    | 0    | B5 C Only                                   |                       |
| 59                     | 2014 | 309 | 20  | 1   |                                      |                     | NM          |      | 1    | .01  | 0                         | 0    | 0    | CSE, B5 ES, B5 EX,<br>CSE, PA, PRO,<br>MISC |                       |
| 60                     | 2014 | 191 | 13  | 1   |                                      |                     | NM          |      | 1    | .02  | 0                         | 0    | 1    | CSE, LOC, PRO                               |                       |
| 61                     | 2017 | 32  | 44  | 4   | PB1 to<br>PB4, PB7                   | SA1,<br>SA2         | Small       | .06  | 1    | .00  | 1                         | 0    | 1    |                                             |                       |
| 62                     | 2015 | 60  | 757 | 14  |                                      |                     | SA1,<br>SA3 | None | AFA  | 1    | .50                       | 1    | 0    | 1                                           |                       |
| 63                     | 2007 | 141 | 30  | 3   |                                      | SA1                 | NM          |      | 1    | .46  | 0                         | 0    | 1    |                                             |                       |
| 64                     | 2009 | 80  | 138 | 1   |                                      |                     | NM          |      | 0    | .21  | 1                         | 0    | 1    |                                             |                       |
| 65                     | 2017 | 96  | 470 | 8   |                                      |                     | NM          |      | 0    | .00  | 1                         | 0    | 1    | MISC                                        |                       |
| 66                     | 2015 | 61  | 116 | 11  |                                      |                     | NM          |      | 1    | .05  | 0                         | 0    | 1    |                                             |                       |
| 67                     | 2005 | 3   | 7   | 1   |                                      |                     | NM          |      | 0    | .00  | 0                         | 0    | 1    |                                             |                       |
| 68                     | 2018 | 316 | 8   | 1   |                                      | SA1                 | NM          |      | 0    | NR   | 0                         | 0    | 1    |                                             |                       |
| 69                     | 2017 | 108 | 25  | 5   | PB3                                  | SA2,<br>SA3         | None        |      | 1    | .32  | 0                         | 0    | 1    | GSE                                         |                       |
| 70                     | 2017 | 90  | 12  | 1   |                                      |                     |             | NM   |      | 1    | .17                       | 0    | 0    | 1                                           | CSE, PRO, SE,<br>MISC |
| 71                     | 1997 | 36  | 71  | 8   |                                      |                     | NM          |      | 0    | .08  | 0                         | 0    | 1    |                                             |                       |

| Descriptive statistics |             |           |            |             | Post hoc and preventative approaches |             |       |     |            |            | Centrality considerations |            |            |                           |
|------------------------|-------------|-----------|------------|-------------|--------------------------------------|-------------|-------|-----|------------|------------|---------------------------|------------|------------|---------------------------|
| (1)                    | (2)         | (3)       | (4)        | (5)         | (6)                                  | (7)         | (8)   | (9) | (10)       | (11)       | (12)                      | (13)       | (14)       | (15)                      |
| 72                     | 2002        | 75        | 31         | 2           |                                      |             | NM    |     | 0          | .21        | 0                         | 0          | 1          |                           |
| 73                     | 2014        | 93        | 202        | 5           |                                      |             | NM    |     | 1          | .15        | 1                         | 0          | 1          |                           |
| 74                     | 2015        | 89        | 162        | 9           |                                      |             | None  | .02 | 1          | .15        | 1                         | 0          | 1          |                           |
| 75                     | 2013        | 24        | 24         | 1           |                                      |             | NA    |     | 1          | .04        | 1                         | 0          | 1          |                           |
| 76                     | 2017        | 23        | 44         | 2           |                                      |             | NA    |     | 0          | 1.00       | 1                         | 0          | 1          |                           |
| 77 <sup>b</sup>        | 2012        | 90        | 37         | 1           | PB2 to<br>PB4, PB7                   | SA2,<br>SA3 | Small | .05 | 1          | .36        | 1                         | 0          | 1          |                           |
| 78                     | 2013        | 74        | 27         | 6           |                                      |             | NM    |     | 0          | .05        | 0                         | 0          | 1          | GSE, NA, PA, PRO,<br>MISC |
| 79                     | 2007        | 5         | 30         | 6           |                                      |             | NM    |     | 0          | .60        | 1                         | 0          | 1          | MISC                      |
| 80                     | 2018        | 5         | 15         | 3           |                                      |             | NM    |     | 0          | 1.00       | 0                         | 0          | 1          |                           |
| 81                     | 2007        | 216       | 20         | 1           |                                      | SA1         | None  |     | 1          | .30        | 0                         | 0          | 1          |                           |
| 82                     | 2008        | 249       | 90         | 6           |                                      | SA1         | NM    |     | 1          | .07        | 1                         | 0          | 1          | MISC                      |
| 83                     | 2010        | 115       | 102        | 3           |                                      |             | NM    |     | 0          | .29        | 1                         | 0          | 1          |                           |
| 84                     | 2015        | 85        | 17         | 1           |                                      |             | NM    |     | 0          | .00        | 0                         | 0          | 1          |                           |
| 85                     | 2017        | 33        | 56         | 10          |                                      |             | NM    |     | 0          | .52        | 1                         | 0          | 1          |                           |
| 86                     | 2016        | 99        | 18         | 3           | PB6                                  | SA3         | None  | .00 | 1          | .39        | 0                         | 0          | 1          | CSE, PRO, MISC            |
| 87                     | 2004        | 41        | 11         | 1           |                                      |             | NM    |     | 0          | .05        | 1                         | 0          | 1          |                           |
| 88                     | 2015        | 272       | 55         | 5           |                                      |             | NM    |     | 1          | .00        | 0                         | 0          | 1          |                           |
| 89                     | 2015        | NR        | 57         | 3           |                                      |             | NM    |     | 1          | NR         | 1                         | 0          | 1          | CSE                       |
| 90                     | 2018        | 102       | 117        | 4           |                                      | SA1,<br>SA2 | NM    | NR  | 1          | .40        | 1                         | 0          | 1          | NA, PA, PRO               |
| 91                     | 2010        | 60        | 63         | 4           |                                      |             | NM    |     | 0          | .25        | 1                         | 0          | 1          |                           |
| 92                     | 2008        | 86        | 34         | 3           |                                      |             | NM    |     | 0          | .29        | 1                         | 0          | 1          |                           |
| <b>Mean</b>            | <b>2011</b> | <b>90</b> | <b>78</b>  | <b>3.90</b> |                                      |             |       |     | <b>.51</b> | <b>.29</b> | <b>.57</b>                | <b>.01</b> | <b>.92</b> |                           |
| <b>SD</b>              | <b>6</b>    | <b>78</b> | <b>125</b> | <b>3.42</b> |                                      |             |       |     |            | <b>.19</b> |                           |            |            |                           |

Note. See Table S16 for a description of information in columns and details about abbreviations used.

<sup>a</sup> Publication bias and sensitivity analyses reported by Kepes, Banks, and McDaniel (2011).

<sup>b</sup> Publication bias and sensitivity analyses reported by Kepes and McDaniel (2013).

Table S18

Sensitivity Analyses for Second-Order Meta-Analyses of C and Occupational Variables: Small-*k* Meta-Analyses

| Variable                    | <i>k</i>     | <i>N</i> | $\bar{r}$ | $SD_r$           | $\bar{\rho}$ | $\bar{\rho}_M$  | $VAR_{True}$ | %   | $\bar{\rho}_M$ | $VAR_{True}$ | %   | $ \bar{\rho} $ |
|-----------------------------|--------------|----------|-----------|------------------|--------------|-----------------|--------------|-----|----------------|--------------|-----|----------------|
|                             | Input values |          |           |                  |              | Observed $SD_r$ |              |     | Imputed $SD_r$ |              |     | <i>diff</i>    |
| <b>Education</b>            |              |          |           |                  |              |                 |              |     |                |              |     |                |
| Training performance        |              |          |           |                  |              |                 |              |     |                |              |     |                |
| Barrick & Mount (1991)      | 17           | 3,585    | .13       | .11              | <b>.16</b>   | <b>.17</b>      | .0002        | 73  | <b>.16</b>     | .0000        | 100 | <i>.01</i>     |
| Darr (2011)                 | 12           | 2,744    | .12       | .06              | <b>.15</b>   |                 | (.01)        |     |                | (.00)        |     |                |
| Hurtz & Donovan (2000)      | 3            | 741      | .02       | .12              | <b>.03</b>   |                 |              |     |                |              |     |                |
| Salgado (1997)              | 3            | 324      | .15       | .04              | <b>.19</b>   |                 |              |     |                |              |     |                |
| Salgado & Táuriz (2014)     | 10           | 2,510    | .10       | .10              | <b>.13</b>   |                 |              |     |                |              |     |                |
| van Aarde et al. (2017)     | 2            | 511      | .16       | .02 <sup>a</sup> | <b>.20</b>   |                 |              |     |                |              |     |                |
| <b>Job Application</b>      |              |          |           |                  |              |                 |              |     |                |              |     |                |
| Assessment center dimension |              |          |           |                  |              |                 |              |     |                |              |     |                |
| Drive                       |              |          |           |                  |              |                 |              |     |                |              |     |                |
| Dilchert & Ones (2009)      | 2            | 4,778    | .31       | .05 <sup>a</sup> | <b>.38</b>   | <b>.29</b>      | .0081        | 17  | <b>.18</b>     | .0037        | 51  | <i>.11</i>     |
| Meriac et al. (2008)        | 7            | 1,184    | .10       | .13              | <b>.12</b>   |                 | (.09)        |     |                | (.06)        |     |                |
| Communication               |              |          |           |                  |              |                 |              |     |                |              |     |                |
| Dilchert & Ones (2009)      | 2            | 4,776    | -.05      | .00 <sup>a</sup> | <b>-.06</b>  | <b>-.06</b>     | .0000        | 26  | <b>.07</b>     | -.0001       | 100 | <i>.13</i>     |
| Meriac et al. (2008)        | 6            | 819      | .09       | .12              | <b>.11</b>   |                 | (.00)        |     |                | (.00)        |     |                |
| Consideration of others     |              |          |           |                  |              |                 |              |     |                |              |     |                |
| Dilchert & Ones (2009)      | 2            | 4,777    | .07       | .01 <sup>a</sup> | <b>.09</b>   | <b>.09</b>      | .0000        | 100 | <b>.11</b>     | -.0014       | 100 | <i>.02</i>     |
| Meriac et al. (2008)        | 7            | 1,046    | .09       | .08              | <b>.11</b>   |                 | (.00)        |     |                | (.00)        |     |                |
| Influencing others          |              |          |           |                  |              |                 |              |     |                |              |     |                |
| Dilchert & Ones (2009)      | 2            | 4,777    | .10       | .01 <sup>a</sup> | <b>.12</b>   | <b>.12</b>      | .0000        | 100 | <b>.11</b>     | -.0056       | 100 | <i>.01</i>     |
| Meriac et al. (2008)        | 6            | 994      | .09       | .15              | <b>.11</b>   |                 | (.00)        |     |                | (.00)        |     |                |
| Stress tolerance            |              |          |           |                  |              |                 |              |     |                |              |     |                |
| Dilchert & Ones (2009)      | 2            | 4,776    | .16       | .07 <sup>a</sup> | <b>.20</b>   | <b>.18</b>      | -.0029       | 23  | <b>.17</b>     | -.0055       | 100 | <i>.01</i>     |
| Meriac et al. (2008)        | 3            | 310      | .12       | .12              | <b>.15</b>   |                 | (.00)        |     |                | (.00)        |     |                |

| Variable                               | $k$          | $N$    | $\bar{r}$ | $SD_r$           | $\bar{\rho}$ | $\bar{\rho}_M$  | $VAR_{True}$  | $\%$      | $\bar{\rho}_M$ | $VAR_{True}$  | $\%$      | $ \bar{\rho} $ |
|----------------------------------------|--------------|--------|-----------|------------------|--------------|-----------------|---------------|-----------|----------------|---------------|-----------|----------------|
|                                        | Input values |        |           |                  |              | Observed $SD_r$ |               |           | Imputed $SD_r$ |               |           | $diff$         |
| <b>Organizing and planning</b>         |              |        |           |                  |              |                 |               |           |                |               |           |                |
| Dilchert & Ones (2009)                 | 2            | 4,778  | .24       | .03 <sup>a</sup> | <b>.29</b>   | <b>.21</b>      | .0074         | 8         | <b>.11</b>     | .0048         | 23        | <i>.10</i>     |
| Meriac et al. (2008)                   | 7            | 1,416  | .05       | .08              | <b>.06</b>   |                 | (.09)         |           |                | (.07)         |           |                |
| <b>Problem solving</b>                 |              |        |           |                  |              |                 |               |           |                |               |           |                |
| Dilchert & Ones (2009)                 | 2            | 4,778  | -.05      | .02 <sup>a</sup> | <b>-.06</b>  | <b>-.04</b>     | .0027         | 12        | <b>.10</b>     | .0036         | 41        | <i>.14</i>     |
| Meriac et al. (2008)                   | 6            | 819    | .13       | .10              | <b>.15</b>   |                 | (.05)         |           |                | (.06)         |           |                |
| <b>On the Job</b>                      |              |        |           |                  |              |                 |               |           |                |               |           |                |
| <b>Contextual performance</b>          |              |        |           |                  |              |                 |               |           |                |               |           |                |
| Judge et al. (2013)                    | 39           | 24,034 | .25       | .09              | <b>.34</b>   | <b>.23</b>      | .0062         | 3         | <b>.33</b>     | .0008         | 36        | <i>.10</i>     |
| van Aarde et al. (2017)                | 2            | 248    | .09       | .02 <sup>a</sup> | <b>.12</b>   |                 | (.08)         |           |                | (.03)         |           |                |
| <b>Counterproductive work behavior</b> |              |        |           |                  |              |                 |               |           |                |               |           |                |
| Carpenter & Berry (2017)               | 11           | 2,755  | -.20      | .18              | <b>-.26</b>  | <b>-.20</b>     | .0065         | 33        | <b>-.22</b>    | .0031         | 53        | <i>.02</i>     |
| Darr (2011)                            | 4            | 1,427  | -.19      | .09              | <b>-.24</b>  |                 | (.08)         |           |                | (.06)         |           |                |
| van Aarde et al. (2017)                | 2            | 168    | .12       | .14 <sup>a</sup> | <b>.15</b>   |                 |               |           |                |               |           |                |
| <b>Occupational Performance</b>        |              |        |           |                  |              |                 |               |           |                |               |           |                |
| <b>Customer Service</b>                |              |        |           |                  |              |                 |               |           |                |               |           |                |
| Hurtz & Donovan (2000)                 | 12           | 1,849  | .17       | .11              | <b>.25</b>   | <b>.28</b>      | .0036         | 24        | <b>.23</b>     | .0006         | 71        | <i>.05</i>     |
| Salgado et al. (2015):                 |              |        |           |                  |              |                 | (.06)         |           |                | (.02)         |           |                |
| Ipsative                               | 3            | 551    | .12       | .06              | <b>.17</b>   |                 |               |           |                |               |           |                |
| Quasi-ipsative                         | 2            | 398    | .29       | .05 <sup>a</sup> | <b>.42</b>   |                 |               |           |                |               |           |                |
| <b>Mean</b>                            |              |        |           |                  |              | <b>.15</b>      | <b>.0031</b>  | <b>38</b> | <b>.16</b>     | <b>.0015</b>  | <b>70</b> | <b>.06</b>     |
|                                        |              |        |           |                  |              |                 | <b>(.056)</b> |           |                | <b>(.039)</b> |           |                |

*Note.* Observed  $SD_r$  correlations (bold), imputed  $SD_r$  correlations (bold and italics),  $|\bar{\rho}| diff$  = absolute difference between correlations (italics).  $k$  = number of independent samples,  $N$  = total sample size,  $\bar{r}$  = mean sample-size weighted observed correlation,  $SD_r$  = mean observed standard deviation,  $\bar{\rho}$  = estimated population correlation (bold) corrected for unreliability,  $\bar{\rho}_M$  = second-order, grand mean population correlation (bold) corrected for unreliability in the predictor and the criterion,  $VAR_{True}$  = estimated residual (i.e., true) population variance and standard deviation (in parentheses) across first-order mean population correlation estimates after accounting for variance attributable to expected second-order sampling error and measurement error (negative values set to zero),  $\%$  = percentage of observed variance across first-order mean population correlation estimates attributable to second-order sampling error and measurement error.

<sup>a</sup> We imputed the  $SD_r$  from the meta-analysis with the largest  $k$  to reduce the biasing effects of first-order sampling error associated with smaller  $k$  meta-analyses.

Table S19

## Sensitivity Analyses for Second-Order Meta-Analyses of C and Occupational Variables: Outlier Meta-Analyses

| Variable                                     | <i>k</i> | <i>N</i> | $\bar{r}$ | <i>SD<sub>r</sub></i> | $\bar{\rho}$ | Observed <i>SD<sub>r</sub></i> |                           |     | Imputed <i>SD<sub>r</sub></i> |                           |    | $ \bar{\rho} $<br><i>diff</i> |
|----------------------------------------------|----------|----------|-----------|-----------------------|--------------|--------------------------------|---------------------------|-----|-------------------------------|---------------------------|----|-------------------------------|
|                                              |          |          |           |                       |              | $\bar{\rho}_M$                 | <i>VAR<sub>True</sub></i> | %   | $\bar{\rho}_M$                | <i>VAR<sub>True</sub></i> | %  |                               |
| <b>Occupational Performance</b>              |          |          |           |                       |              |                                |                           |     |                               |                           |    |                               |
| Skilled/Semi-Skilled                         |          |          |           |                       |              |                                |                           |     |                               |                           |    |                               |
| Barrick & Mount (1991)                       | 25       | 4,588    | .12       | .09                   | <b>.17</b>   | <b>.24</b>                     | .0132                     | 6   | <b>.21</b>                    | .0082                     | 10 | <i>.03</i>                    |
| Hurtz & Donovan (2000)                       | 14       | 3,481    | .10       | .12                   | <b>.14</b>   |                                | (.11)                     |     |                               | (.09)                     |    |                               |
| Salgado (1997): European                     | 8        | 1,264    | .09       | .09                   | <b>.13</b>   |                                |                           |     |                               |                           |    |                               |
| Salgado et al. (2015):                       |          |          |           |                       |              |                                |                           |     |                               |                           |    |                               |
| Skilled - Quasi-ipsative                     | 8        | 2,338    | .43       | .09 <sup>a</sup>      | <b>.62</b>   |                                |                           |     |                               |                           |    |                               |
| Clerical - Quasi-ipsative                    | 3        | 357      | .16       | .09                   | <b>.23</b>   |                                |                           |     |                               |                           |    |                               |
| Skilled/Semi-Skilled ( <i>less outlier</i> ) |          |          |           |                       |              |                                |                           |     |                               |                           |    |                               |
| Barrick & Mount (1991)                       | 25       | 4,588    | .12       | .09                   | <b>.17</b>   | <b>.16</b>                     | .0000                     | 100 |                               |                           |    | <i>.08</i>                    |
| Hurtz & Donovan (2000)                       | 14       | 3,481    | .10       | .12                   | <b>.14</b>   |                                | (.00)                     |     |                               |                           |    |                               |
| Salgado (1997): European                     | 8        | 1,264    | .09       | .09                   | <b>.13</b>   |                                |                           |     |                               |                           |    |                               |
| Clerical - Quasi-ipsative                    | 3        | 357      | .16       | .09                   | <b>.23</b>   |                                |                           |     |                               |                           |    |                               |
| Sales                                        |          |          |           |                       |              |                                |                           |     |                               |                           |    |                               |
| Barrick & Mount (1991)                       | 21       | 2,263    | .09       | .10                   | <b>.13</b>   | <b>.15</b>                     | .0023                     | 9   | <b>.23</b>                    | .0026                     |    | <i>.08</i>                    |
| Hurtz & Donovan (2000)                       | 10       | 1,369    | .18       | .11                   | <b>.26</b>   |                                | (.05)                     |     |                               | (.05)                     |    |                               |
| Salgado (1997): European                     | 6        | 576      | .08       | .02 <sup>b</sup>      | <b>.12</b>   |                                |                           |     |                               |                           |    |                               |
| Salgado et al. (2015): Ipsative              | 5        | 665      | .18       | .06                   | <b>.26</b>   |                                |                           |     |                               |                           |    |                               |
| Salgado et al. (2015): Quasi-ipsative        | 4        | 472      | .22       | .04                   | <b>.32</b>   |                                |                           |     |                               |                           |    |                               |
| Sales ( <i>less outlier</i> )                |          |          |           |                       |              |                                |                           |     |                               |                           |    |                               |
| Barrick & Mount (1991)                       | 21       | 2,263    | .09       | .10                   | <b>.13</b>   | <b>.24</b>                     | .0024                     | 19  |                               |                           |    | <i>.09</i>                    |
| Hurtz & Donovan (2000)                       | 10       | 1,369    | .18       | .11                   | <b>.26</b>   |                                | (.05)                     |     |                               |                           |    |                               |
| Salgado et al. (2015): Ipsative              | 5        | 665      | .18       | .06                   | <b>.26</b>   |                                |                           |     |                               |                           |    |                               |
| Salgado et al. (2015): Quasi-ipsative        | 4        | 472      | .22       | .04                   | <b>.32</b>   |                                |                           |     |                               |                           |    |                               |

Note. Observed *SD<sub>r</sub>* correlations (bold), imputed *SD<sub>r</sub>* correlations (bold and italics),  $|\bar{\rho}|$  *diff* = absolute difference between correlations (italics). *k* = number of independent samples, *N* = total sample size,  $\bar{r}$  = mean sample-size weighted observed correlation, *SD<sub>r</sub>* = mean observed standard deviation,  $\bar{\rho}$  = estimated population correlation (bold) corrected for unreliability,  $\bar{\rho}_M$  = second-order, grand mean population correlation (bold) corrected for unreliability in the predictor

and the criterion,  $VAR_{True}$  = estimated residual (i.e., true) population variance and standard deviation (in parentheses) across first-order mean population correlation estimates after accounting for variance attributable to expected second-order sampling error and measurement error (negative values set to zero), % = percentage of observed variance across first-order mean population correlation estimates attributable to second-order sampling error and measurement error.

<sup>a</sup> We imputed the  $SD_r$  from the meta-analysis with the largest variance to reduce the biasing effects of the outlying first-order meta-analytic effect.

<sup>b</sup> We imputed the  $SD_r$  from the meta-analysis with the largest  $k$  to reduce the biasing effects of the outlying first-order meta-analytic variance.

Table S20

## Sensitivity Analyses for Second-Order Meta-Analyses of C and Occupational Variables: Alternative Meta-Analyses

| Variable                                                      | <i>k</i>     | <i>N</i> | $\bar{r}$ | $SD_r$ | $\bar{\rho}$ | $\bar{\rho}_M$   | $SD_\rho$ | 80% CR |      | $\bar{\rho}_M$      | $SD_\rho$ | 80% CR |      | $ \bar{\rho} $<br><i>diff</i> |
|---------------------------------------------------------------|--------------|----------|-----------|--------|--------------|------------------|-----------|--------|------|---------------------|-----------|--------|------|-------------------------------|
|                                                               |              |          |           |        |              |                  |           | LO     | HI   |                     |           | LO     | HI   |                               |
|                                                               | Input values |          |           |        |              | Reported results |           |        |      | Alternative results |           |        |      |                               |
| <b>Education</b>                                              |              |          |           |        |              |                  |           |        |      |                     |           |        |      |                               |
| Academic performance: Postsecondary                           |              |          |           |        |              |                  |           |        |      |                     |           |        |      |                               |
| Richardson et al. (2012) <sup>a</sup>                         | 69           | 27,875   | .19       | .11    | <b>.22</b>   | <b>.24</b>       | .03       | .20    | .27  | <b>.20</b>          | .03       | .16    | .23  | <b>.04</b>                    |
| Vedel (2016) <sup>a</sup>                                     | 21           | 17,717   | .26       | .10    | <b>.30</b>   |                  |           |        |      | <b>.22</b>          | .06       | .14    | .29  | <b>.02</b>                    |
| <b>On the Job</b>                                             |              |          |           |        |              |                  |           |        |      |                     |           |        |      |                               |
| Burnout                                                       |              |          |           |        |              |                  |           |        |      |                     |           |        |      |                               |
| Emotional exhaustion                                          |              |          |           |        |              |                  |           |        |      |                     |           |        |      |                               |
| Alarcon et al. (2009) <sup>b</sup>                            | 16           | 5,926    | -.20      | .10    | <b>-.24</b>  | <b>-.17</b>      | .00       | -.17   | -.17 | <b>-.19</b>         | .03       | -.23   | -.15 | <b>.02</b>                    |
| Depersonalization                                             |              |          |           |        |              |                  |           |        |      |                     |           |        |      |                               |
| Alarcon et al. (2009) <sup>b</sup>                            | 22           | 8,237    | -.16      | .09    | <b>-.21</b>  | <b>-.26</b>      | .00       | -.26   | -.26 | <b>-.23</b>         | .00       | -.23   | -.23 | <b>.03</b>                    |
| Personal accomplishment                                       |              |          |           |        |              |                  |           |        |      |                     |           |        |      |                               |
| Alarcon et al. (2009) <sup>b</sup>                            | 16           | 4,615    | .18       | .14    | <b>.23</b>   | <b>.35</b>       | .03       | .30    | .39  | <b>.33</b>          | .06       | .26    | .41  | <b>.02</b>                    |
| Occupational performance                                      |              |          |           |        |              |                  |           |        |      |                     |           |        |      |                               |
| Hough (1992) <sup>c</sup>                                     | 73           | 12,106   | .15       | .08    | <b>.22</b>   | <b>.18</b>       | .02       | .15    | .21  | <b>.20</b>          | .03       | .16    | .23  | <b>.02</b>                    |
| Overall job performance                                       |              |          |           |        |              |                  |           |        |      |                     |           |        |      |                               |
| Salgado (2003): Direct Big Five measures <sup>d</sup>         | 90           | 19,460   | .17       | .13    | <b>.27</b>   | <b>.27</b>       | .04       | .22    | .33  | <b>.26</b>          | .04       | .21    | .31  | <b>.01</b>                    |
| Joseph & Newman (2010) <sup>d</sup>                           | 64           | 12434    | .15       | .10    | <b>.24</b>   |                  |           |        |      | <b>.25</b>          | .04       | .20    | .30  | <b>.02</b>                    |
| Shaffer & Postlethwaite (2012): General measures <sup>d</sup> | 76           | 13,379   | .13       | .08    | <b>.20</b>   |                  |           |        |      | <b>.24</b>          | .04       | .19    | .29  | <b>.03</b>                    |
| <b>Career/Lifespan</b>                                        |              |          |           |        |              |                  |           |        |      |                     |           |        |      |                               |
| Antisocial behavior                                           |              |          |           |        |              |                  |           |        |      |                     |           |        |      |                               |
| Vize et al. (2018) <sup>e</sup>                               | 20           | 6,499    | -.21      | .11    | <b>-.26</b>  | <b>-.29</b>      | .00       | -.29   | -.29 | <b>-.30</b>         | .00       | -.31   | -.29 | <b>.01</b>                    |



| Variable                        | $k$          | $N$   | $\bar{r}$ | $SD_r$ | $\bar{\rho}$ | Reported results |            |        |     | Alternative results |                   |        |     | $ \bar{\rho} _{diff}$ |
|---------------------------------|--------------|-------|-----------|--------|--------------|------------------|------------|--------|-----|---------------------|-------------------|--------|-----|-----------------------|
|                                 |              |       |           |        |              | $\bar{\rho}_M$   | $SD_\rho$  | 80% CR |     | $\bar{\rho}_M$      | $SD_\rho$         | 80% CR |     |                       |
|                                 |              |       |           |        |              |                  |            | LO     | HI  |                     |                   | LO     | HI  |                       |
|                                 | Input values |       |           |        |              | Reported results |            |        |     | Alternative results |                   |        |     |                       |
| <b>Occupational Performance</b> |              |       |           |        |              |                  |            |        |     |                     |                   |        |     |                       |
| Managerial                      |              |       |           |        |              |                  |            |        |     |                     |                   |        |     |                       |
| Hough (1992) <sup>c</sup>       | 14           | 1,829 | .09       | .09    | <b>.13</b>   | <b>.16</b>       | .00        | .16    | .16 | <i>.13</i>          | .00               | .13    | .13 | <i>.03</i>            |
| <b>Mean</b>                     |              |       |           |        |              | <b>.24</b>       | <b>.02</b> |        |     | <i><b>.23</b></i>   | <i><b>.03</b></i> |        |     | <i><b>.02</b></i>     |

*Note.* Reported meta-analysis correlations (bold), alternative meta-analysis correlations (bold and italics),  $|\bar{\rho}|_{diff}$  = absolute difference between correlations (italics).  $k$  = number of independent samples,  $N$  = total sample size,  $\bar{r}$  = mean sample-size weighted observed correlation,  $SD_r$  = mean observed standard deviation,  $\bar{\rho}$  = estimated population correlation (bold) corrected for unreliability,  $SD_\rho$  = standard deviation of population correlation, 80% CR = 80% credibility interval around population correlation.

<sup>a</sup> Alternative to McAbee and Oswald (2013). <sup>b</sup> Alternative to Swider and Zimmerman (2010). <sup>c</sup> Alternative to Barrick and Mount (1991). <sup>d</sup> Alternative to Judge et al. (2013). <sup>e</sup> Alternative to Jones et al. (2011).

## Appendix

### Artifact Distributions Used in Corrections

| Variable                                  | Source(s)                    | <i>r</i> | <i>k</i> | $\bar{r}_{yy}$ |
|-------------------------------------------|------------------------------|----------|----------|----------------|
| <b>Motivations, Values, and Interests</b> |                              |          |          |                |
| <i>Education</i>                          |                              |          |          |                |
| Goal orientation                          |                              |          |          |                |
| Learning                                  | Payne et al. (2007)          | 1        | 173      | .81            |
| Performance avoidance                     | Payne et al. (2007)          | 1        | 59       | .78            |
| Performance prove                         | Payne et al. (2007)          | 1        | 166      | .79            |
| Academic self-efficacy                    | Judge & Ilies (2002)         | 1        | NR       | .76            |
| Academic procrastination                  | Steel (2007)                 | 1        | NR       | .90            |
| <i>Job Application</i>                    |                              |          |          |                |
| Job search self-regulation                | van Hooft et al. (2015)      | 1        | NR       | .87            |
| Applicant reactions: Test motivation      | Hausknecht et al. (2004)     | 1        | NR       | .83            |
| Assessment center dimension: Drive        | Meriac et al. (2008)         | 1        | NR       | .86            |
| <i>On the Job</i>                         |                              |          |          |                |
| Regulatory focus                          |                              |          |          |                |
| Prevention                                | Lanaj et al. (2012)          | 1        | NR       | .86            |
| Promotion                                 | Lanaj et al. (2012)          | 1        | NR       | .82            |
| Psychological needs                       |                              |          |          |                |
| Autonomy                                  | van den Broeck et al. (2016) | 1        | NR       | .74            |
| Competence                                | van den Broeck et al. (2016) | 1        | NR       | .83            |
| Relatedness                               | van den Broeck et al. (2016) | 1        | NR       | .79            |
| Performance motivation                    |                              |          |          |                |
| Expectancy                                | Judge & Ilies (2002)         | 1        | NR       | .65            |
| Goal-setting                              | Judge & Ilies (2002)         | 1        | NR       | .85            |
| Self-efficacy                             | Judge & Ilies (2002)         | 1        | NR       | .76            |
| Demonstrating effort                      | Wilmot et al. (2014)         | 3        | NR       | .56            |
| Employee engagement                       | Christian et al. (2011)      | 1        | 90       | .88            |
| <i>Career/Lifespan</i>                    |                              |          |          |                |
| Personal values                           |                              |          |          |                |
| Self-enhancement                          | Parks-Leduc et al. (2015)    | 1        | NR       | .73            |
| Achievement                               | Parks-Leduc et al. (2015)    | 1        | NR       | .76            |
| Hedonism                                  | Parks-Leduc et al. (2015)    | 1        | NR       | .72            |
| Power                                     | Parks-Leduc et al. (2015)    | 1        | NR       | .72            |
| Self-transcendence                        | Parks-Leduc et al. (2015)    | 1        | NR       | .75            |
| Benevolence                               | Parks-Leduc et al. (2015)    | 1        | NR       | .72            |
| Universalism                              | Parks-Leduc et al. (2015)    | 1        | NR       | .78            |
| Openness to change                        | Parks-Leduc et al. (2015)    | 1        | NR       | .71            |
| Self-direction                            | Parks-Leduc et al. (2015)    | 1        | NR       | .67            |
| Stimulation                               | Parks-Leduc et al. (2015)    | 1        | NR       | .73            |
| Conservation                              | Parks-Leduc et al. (2015)    | 1        | NR       | .67            |

| Variable                           | Source(s)                 | <i>r</i> | <i>k</i> | $\bar{r}_{yy}$ |
|------------------------------------|---------------------------|----------|----------|----------------|
| Conformity                         | Parks-Leduc et al. (2015) | 1        | NR       | .68            |
| Security                           | Parks-Leduc et al. (2015) | 1        | NR       | .65            |
| Tradition                          | Parks-Leduc et al. (2015) | 1        | NR       | .63            |
| Vocational interests               |                           |          |          |                |
| Realistic                          | Wiernik (2016)            | 1        | 21       | .93            |
| Investigative                      | Wiernik (2016)            | 1        | 21       | .93            |
| Artistic                           | Wiernik (2016)            | 1        | 21       | .95            |
| Social                             | Wiernik (2016)            | 1        | 21       | .93            |
| Enterprising                       | Wiernik (2016)            | 1        | 21       | .93            |
| Conventional                       | Wiernik (2016)            | 1        | 21       | .92            |
| Entrepreneurial intentions         | Zhao et al. (2010)        | 1        | NR       | .91            |
| Procrastination                    | Steel (2007)              | 1        | NR       | .90            |
| Workaholism                        | Clark et al. (2016)       | 1        | NR       | .89            |
| <b>Interpersonal</b>               |                           |          |          |                |
| <b><i>Job Application</i></b>      |                           |          |          |                |
| Employment interview               |                           |          |          |                |
| Conventional/Low structure         | Conway et al. (1995)      | 3        | 22       | .64            |
| Behavioral/High structure          | Salgado & Moscato (1995)  | 3        | NR       | .75            |
| Negotiation performance            | Conway et al. (1995)      | 3        | 22       | .64            |
| Assessment center dimension        |                           |          |          |                |
| Communication                      | Meriac et al. (2008)      | 1        | NR       | .86            |
| Consideration of others            | Meriac et al. (2008)      | 1        | NR       | .80            |
| Influencing others                 | Meriac et al. (2008)      | 1        | NR       | .87            |
| Assessment center exercise         |                           |          |          |                |
| Leaderless group discussion        | Hoffman et al. (2015)     | 1        | NR       | .93            |
| Oral presentation                  | Hoffman et al. (2015)     | 1        | NR       | .94            |
| Role-play                          | Hoffman et al. (2015)     | 1        | NR       | .88            |
| <b><i>On the Job</i></b>           |                           |          |          |                |
| Social networks                    |                           |          |          |                |
| Expressive: Brokerage              | Fang et al. (2015)        | 0        | NR       | 1.0            |
| Expressive: Indegree               | Fang et al. (2015)        | 0        | NR       | 1.0            |
| Instrumental: Brokerage            | Fang et al. (2015)        | 0        | NR       | 1.0            |
| Instrumental: Indegree             | Fang et al. (2015)        | 0        | NR       | 1.0            |
| “Getting along” performance        | Wilmot et al. (2014)      | 3        | 20       | .67            |
| Interpersonal citizenship behavior | Wilmot et al. (2014)      | 3        | 20       | .67            |
| <b><i>Career/Lifespan</i></b>      |                           |          |          |                |
| Interpersonal sensitivity          | Salgado & Moscato (1995)  | 3        | NR       | .75            |
| Leadership                         |                           |          |          |                |
| Overall                            | Wilmot et al. (2014)      | 3        | 15       | .64            |
| Emergence                          | Wilmot et al. (2014)      | 3        | 15       | .64            |
| Effectiveness                      | Wilmot et al. (2014)      | 3        | 15       | .64            |
| Group performance                  | Wilmot et al. (2014)      | 3        | 15       | .64            |
| Transformational leadership        |                           |          |          |                |
| Overall                            | Wilmot et al. (2014)      | 3        | 15       | .64            |
| Charisma                           | Wilmot et al. (2014)      | 3        | 15       | .64            |

| Variable                                      | Source(s)                          | <i>r</i> | <i>k</i> | $\bar{r}_{yy}$ |
|-----------------------------------------------|------------------------------------|----------|----------|----------------|
| Individualized consideration                  | Wilmot et al. (2014)               | 3        | 15       | .64            |
| Intellectual stimulation                      | Wilmot et al. (2014)               | 3        | 15       | .64            |
| Transactional leadership                      |                                    |          |          |                |
| Contingent reward                             | Wilmot et al. (2014)               | 3        | 15       | .64            |
| Management by exception                       | Wilmot et al. (2014)               | 3        | 15       | .64            |
| Passive leadership                            | Wilmot et al. (2014)               | 3        | 15       | .64            |
| <b>Attitudes and Well-Being</b>               |                                    |          |          |                |
| <b>Education</b>                              |                                    |          |          |                |
| Adjustment to college                         |                                    |          |          |                |
| Overall                                       | Credé & Niehorster (2012)          | 1        | 55       | .92            |
| Academic                                      | Credé & Niehorster (2012)          | 1        | 53       | .85            |
| Social                                        | Credé & Niehorster (2012)          | 1        | 46       | .83            |
| Personal-emotional                            | Credé & Niehorster (2012)          | 1        | 49       | .83            |
| Institutional attachment                      | Credé & Niehorster (2012)          | 1        | 34       | .83            |
| Study attitudes                               | Credé & Kuncel (2008)              | 1        | 30       | .83            |
| Career decision-making difficulties           | Osipow & Gati (1998)               | 1        | NR       | .94            |
| <b>Job Application</b>                        |                                    |          |          |                |
| Applicant attraction to organization          | Swider et al. (2015)               | 1        | NR       | .87            |
| Applicant attraction to organization          | Swider et al. (2015)               | 1        | NR       | .87            |
| Applicant reactions: Procedural justice       | Hausknecht et al. (2004)           | 1        | NR       | .83            |
| Assessment center dimension: Stress tolerance | Meriac et al. (2008)               | 1        | NR       | .85            |
| <b>On the Job</b>                             |                                    |          |          |                |
| Job satisfaction                              | Judge et al. (2002b)               | 1        | NR       | .83            |
| Organizational commitment                     |                                    |          |          |                |
| Global                                        | Choi et al. (2015)                 | 1        | 14       | .87            |
| Affective                                     | Choi et al. (2015)                 | 1        | 39       | .84            |
| Continuance                                   | Choi et al. (2015)                 | 1        | 20       | .73            |
| Normative                                     | Choi et al. (2015)                 | 1        | 19       | .78            |
| Turnover intentions                           | Zimmerman (2008)                   | 1        | NR       | .81            |
| Work-life balance                             |                                    |          |          |                |
| Family interference with work                 | Mesmer-Magnus & Viswesvaran (2005) | 1        | NR       | .79            |
| Work interference with family                 | Mesmer-Magnus & Viswesvaran (2005) | 1        | NR       | .79            |
| Work-nonwork spillover: Negative              | Mesmer-Magnus & Viswesvaran (2005) | 1        | NR       | .79            |
| Work-nonwork spillover: Positive              | Mesmer-Magnus & Viswesvaran (2005) | 1        | NR       | .79            |
| Expatriate adjustment                         |                                    |          |          |                |
| Overall                                       | Harari et al. (2018)               | 1        | NR       | .86            |
| General                                       | Harari et al. (2018)               | 1        | NR       | .81            |

| Variable                         | Source(s)                    | <i>r</i> | <i>k</i> | $\bar{r}_{yy}$ |
|----------------------------------|------------------------------|----------|----------|----------------|
| Interactional                    | Harari et al. (2018)         | 1        | NR       | .87            |
| Work                             | Harari et al. (2018)         | 1        | NR       | .86            |
| <b>Burnout</b>                   |                              |          |          |                |
| Emotional exhaustion             | Swider & Zimmerman (2011)    | 1        | NR       | .88            |
| Depersonalization                | Swider & Zimmerman (2011)    | 1        | NR       | .74            |
| Personal accomplishment          | Swider & Zimmerman (2011)    | 1        | NR       | .76            |
| Leader-member exchange           | Dulebohn et al. (2012)       | 1        | NR       | .91            |
| Abusive supervision perceptions  | Mackey et al. (2017)         | 1        | NR       | .82            |
| Workplace harassment perceptions | Mackey et al. (2017)         | 1        | NR       | .82            |
| <b>Justice perceptions</b>       |                              |          |          |                |
| Distributive                     | Huang et al. (2017)          | 1        | NR       | .93            |
| Informational                    | Huang et al. (2017)          | 1        | NR       | .88            |
| Interpersonal                    | Huang et al. (2017)          | 1        | NR       | .88            |
| Procedural                       | Huang et al. (2017)          | 1        | NR       | .87            |
| Safety climate                   | Beus et al. (2015)           | 1        | NR       | .90            |
| <b>Career/Lifespan</b>           |                              |          |          |                |
| Career adaptability              | Rudolph et al. (2017b)       | 1        | NR       | .96            |
| Career satisfaction              | Ng et al. (2005)             | 1        | NR       | .85            |
| Happiness                        | Steel et al. (2008)          | 1        | NR       | .93            |
| Life satisfaction                | Steel et al. (2008)          | 1        | NR       | .84            |
| Quality of life                  | Steel et al. (2008)          | 1        | NR       | .74            |
| <b>Counterproductivity</b>       |                              |          |          |                |
| <b>Education</b>                 |                              |          |          |                |
| Academic dishonesty              | Giluk & Postlethwaite (2015) | 1        | NR       | .83            |
| <b>Job Application</b>           |                              |          |          |                |
| Applicant faking                 | Birkeland et al. (2006)      | 0        | NR       | 1.0            |
| <b>On the Job</b>                |                              |          |          |                |
| Safety performance               | Beus et al. (2015)           | 1        | NR       | .84            |
| Irresponsible behavior           | Wilmot et al. (2014)         | 3        | NR       | .60            |
| Counterproductive work behavior  |                              |          |          |                |
| Overall                          | Dalal (2005)                 | 1        | NR       | .77            |
| Other-ratings                    | Wilmot et al. (2014)         | 3        | NR       | .60            |
| Interpersonal                    | Berry et al. (2007)          | 1        | 26       | .84            |
| Organizational                   | Berry et al. (2007)          | 1        | 22       | .82            |
| Withdrawal behavior              | Carpenter & Berry (2017)     | 1        | 37       | .79            |
| Cyberloafing                     | Mercado et al. (2017)        | 1        | 42       | .87            |
| Absenteeism                      | Li et al. (2014)             | 1        | 37       | .79            |
| <b>Career/Lifespan</b>           |                              |          |          |                |
| Antisocial behavior              | Berry et al. (2007)          | 1        | 26       | .84            |
| Aggression                       | Berry et al. (2007)          | 1        | 26       | .84            |
| Accidents                        |                              |          |          |                |
| Occupational                     | Salgado (2002)               | 1        | 9        | .45            |
| Vehicular                        | Salgado (2002)               | 1        | 9        | .45            |

| Variable                            | Source(s)                 | <i>r</i> | <i>k</i> | $\bar{r}_{yy}$ |
|-------------------------------------|---------------------------|----------|----------|----------------|
| <b>Performance</b>                  |                           |          |          |                |
| <i>Education</i>                    |                           |          |          |                |
| Study habits                        | Credé & Kuncel (2008)     | 1        | 30       | .83            |
| Academic attendance                 | Salgado & Táuriz (2014)   | 1        | NR       | 1.0            |
| Academic performance                | Salgado & Táuriz (2014)   | 1        | 8        | .81            |
| Postsecondary                       | Beatty et al. (2015)      | 1        | 98       | .93            |
| Academic success                    | Salgado & Táuriz (2014)   | 1        | 8        | .81            |
| Educational attainment              | Ng & Feldman (2010)       | 0        | NR       | 1.0            |
| Training performance                | Salgado & Táuriz (2014)   | 1        | 2        | .80            |
| Training success                    | Blume et al. (2010)       | 1        | NR       | .77            |
| <i>Job Application</i>              |                           |          |          |                |
| Situational judgment test           |                           |          |          |                |
| Knowledge                           | McDaniel et al. (2007)    | 0        | NR       | 1.0            |
| Behavioral tendency                 | McDaniel et al. (2007)    | 0        | NR       | 1.0            |
| Job search success                  |                           |          |          |                |
| Job search intensity                | van Hooft et al. (2015)   | 1        | NR       | .86            |
| Employment status                   | van Hooft et al. (2015)   | 0        | NR       | 1.0            |
| Employment quality                  | van Hooft et al. (2015)   | 0        | NR       | 1.0            |
| Assessment center dimension         |                           |          |          |                |
| Organizing and planning             | Meriac et al. (2008)      | 1        | NR       | .87            |
| Problem solving                     | Meriac et al. (2008)      | 1        | NR       | .91            |
| Assessment center exercise          |                           |          |          |                |
| Case analysis                       | Hoffman et al. (2015)     | 1        | NR       | .85            |
| In-basket                           | Hoffman et al. (2015)     | 1        | NR       | .83            |
| <i>On the Job</i>                   |                           |          |          |                |
| Occupational performance            | Salgado & Táuriz (2014)   | 3        | 20       | .61            |
| Training and job performance        | Viswesvaran et al. (1996) | 3        | 40       | .52            |
| Overall job performance             |                           |          |          |                |
| Supervisor-ratings                  | Viswesvaran et al. (1996) | 3        | 40       | .52            |
| Peer-ratings                        | Conway et al. (2001)      | 3        | 9        | .29            |
| Subordinate-ratings                 | Conway et al. (2001)      | 3        | 14       | .25            |
| Self-ratings                        | Joseph et al. (2015)      | 1        | NR       | .82            |
| Maximal performance                 | Beus & Whitman (2012)     | 1        | NR       | .75            |
| Typical performance                 | Beus & Whitman (2012)     | 1        | NR       | .81            |
| Technical performance               | Wilmot et al. (2014)      | 3        | 16       | .77            |
| Contextual performance              | Wilmot et al. (2014)      | 3        | 20       | .67            |
| Organizational citizenship behavior |                           |          |          |                |
| Overall                             | Wilmot et al. (2014)      | 3        | 20       | .67            |
| Global                              | Wilmot et al. (2014)      | 3        | 20       | .67            |
| Organizational                      | Wilmot et al. (2014)      | 3        | 20       | .67            |
| Change                              | Wilmot et al. (2014)      | 3        | 20       | .67            |
| Voice                               |                           |          |          |                |
| Overall                             | Chamberlin et al. (2016)  | 1        | NR       | .86            |
| Prohibitive                         | Chamberlin et al. (2016)  | 1        | NR       | .86            |

| Variable                      | Source(s)                | <i>r</i> | <i>k</i> | $\bar{r}_{yy}$ |
|-------------------------------|--------------------------|----------|----------|----------------|
| Promotive                     | Chamberlin et al. (2016) | 1        | NR       | .86            |
| Adaptive performance          | Huang et al. (2014)      | 3        | 240      | .78            |
| Creativity                    | Salgado & Táuriz (2014)  | 3        | 20       | .61            |
| Performance rating leniency   | Harari et al. (2015)     | 1        | NR       | .84            |
| <b><i>Career/Lifespan</i></b> |                          |          |          |                |
| Job complexity                | Zimmerman (2008)         | 1        | NR       | .83            |
| Job crafting                  | Rudolph et al. (2017a)   | 1        | NR       | .83            |
| Organizational tenure         | Ng & Feldman (2010)      | 0        | NR       | 1.0            |
| Personnel data                | Salgado & Táuriz (2014)  | 3        | 20       | .61            |
| Commendable behavior          | Salgado & Táuriz (2014)  | 3        | 20       | .61            |
| Productivity                  | Salgado & Táuriz (2014)  | 1        | 7        | .83            |
| Status change                 | Barrick & Mount (1991)   | 0        | NR       | 1.0            |
| Promotions                    | Ng et al. (2005)         | 0        | NR       | 1.0            |
| Salary                        | Ng et al. (2005)         | 0        | NR       | 1.0            |
| <b>Personality</b>            |                          |          |          |                |
| Conscientiousness             | Davies et al. (2015)     | 1        | 307      | .79            |

*Note.* *r* = type of reliability coefficient: 0 = none, 1 = internal consistency (i.e., coefficient of equivalence), 2 = test-retest (i.e., coefficient of stability), 3 = inter-rater reliability. *k* = total number of coefficients; NR = not reported.

### References for Supplementary Information

1. Barrick MR, Mount MK, Judge TA (2001) Personality and performance at the beginning of the new millennium: What do we know and where do we go next? *Int J Select Assess* 9:9–30.
2. Borghans L, Duckworth AL, Heckman JJ, ter Weel B (2008) The economics and psychology of personality traits. *J Hum Resour* 43:972–1059.
3. Brandstatter H (2011) Personality aspects of entrepreneurship: A look at five meta-analyses. *Pers Individ Differ* 51:222–230.
4. Connelly BS, Ones DS, Chernyshenko OS (2014) Introducing the special section on Openness to Experience: Review of Openness taxonomies measurement and nomological net. *J Pers Assess* 96:1–16.
5. Judge TA, Klinger R, Simon LS, Yang IWF (2008) Contributions of personality to organizational behavior and psychology: Findings criticisms and future research directions. *Soc Pers Psychol Compass* 2:1982–2000.
6. Ones DS, Dilchert S, Viswesvaran C, Judge TA (2007) In support of personality assessment in organizational settings. *Pers Psychol* 60:995–1027.
7. Ones DS, Viswesvaran C, Dilchert S (2005) Personality at work: Raising awareness and correcting misconceptions. *Hum Perform* 18:389–404.
8. Ozer DJ, Benet-Martínez V (2006) Personality and the prediction of consequential outcomes. *Annu Rev Psychol* 57:401–421.
9. Roberts BW, Kuncel NR, Shiner R, Caspi A, Goldberg LR (2007) The power of personality: The comparative validity of personality traits socioeconomic status and cognitive ability for predicting important life outcomes. *Perspect Psychol Sci* 2:313–345.
10. Wilmot MP (2017) *Personality and its impacts across the behavioral sciences: A quantitative review of meta-analytic findings*. PhD dissertation. (University of Minnesota, Minneapolis, MN).
11. Wilmot MP, Wanberg CR, Kammeyer-Mueller JD, Ones DS (2019, May 23) Extraversion advantages at work: A quantitative review and synthesis of the meta-analytic evidence. *J Appl Psychol*. Advance online publication. <https://doi.org/10.1037/apl0000415>
12. Fisher RA (1915) Frequency distribution of the values of the correlation coefficient in samples of an indefinitely large population. *Biometrika* 10:507–521.
13. Hunter JE, Schmidt, FL (2014) *Methods of Meta-analysis: Correcting Error and Bias in Research Findings* (3<sup>rd</sup> ed.) (Sage, Thousand Oaks, California).
14. Whitener EM (1990) Confusion of confidence intervals and credibility intervals in meta-analysis. *J Appl Psychol* 75:315–321.
15. Viswesvaran C, Ones DS (2000) Measurement error in “Big Five factors” personality assessment: Reliability generalization across studies and measures. *Educ Psychol Meas* 60:224–235.
16. Ghiselli EE, Campbell JP, Zedeck S (1981) *Measurement Theory for the Behavioral Sciences* (WH Freeman, San Francisco, CA).
17. Dudley NM, Orvis KA, Lebiecki JE, Cortina JM (2006) A meta-analytic investigation of Conscientiousness in the prediction of job performance: Examining the intercorrelations and the incremental validity of narrow traits. *J Appl Psychol* 91:40–57.
18. Wilmot MP, Wiernik BM, Kostal JW (2014) Increasing interrater reliability using composite performance measures. *Ind Organ Psychol-US* 7:542–545.



19. Davies SE, Connelly BS, Ones DS, Birkland AS (2015) The general factor of personality: The “Big One” a self-evaluative trait or a methodological gnat that won’t go away? *Pers Individ Differ* 81:13–22.
20. Schmidt FL, Viswesvaran C, Ones DS (2000) Reliability is not validity and validity is not reliability. *Pers Psychol* 53:901–912.
21. US Employment Service (1977) *Dictionary of Occupational Titles* (4th ed.) (Superintendent of Documents, US Government Printing Office, Washington, DC).  
<https://www.occupationalinfo.org>.
22. Cooper H (2016). *Research Synthesis and Meta-Analysis: A Step-by-Step Approach* (5<sup>th</sup> ed) (Sage, Thousand Oaks, CA).
23. Kepes S, Banks GC, McDaniel M, Whetzel DL (2012) Publication bias in the organizational sciences. *Organ Res Methods* 15:624–662.
24. Bax L, Moon, KG (2011) Beyond publication bias. *J Clin Epidemiol* 64:459–462.
25. Greenwald AG (1975) Consequences of prejudice against the null hypothesis. *Psychol Bull* 82:1-20.
26. Rosenthal R (1979) The “file drawer problem” and tolerance for null results. *Psychol Bull* 86:638–641.
27. Rosenthal R, Rubin DB (1979) A note on percent variance explained as a measure of the importance of effects. *J Appl Soc Psychol* 9:395–396.
28. Sutton AJ (2009) Publication bias. *The Handbook of Research Synthesis and Meta-Analysis*, eds Cooper H, Hedges LV, Valentine, JC (2<sup>nd</sup> ed.) (Sage, New York, NY), 435–454.
29. Banks GC, Kepes S, McDaniel MA (2012) Publication bias: A call for improved meta-analytic practice in the organizational sciences. *Int J Select Assess* 20:182–196.
30. Card NA (2012) *Applied Meta-Analysis for Social Science Research* (Guilford Press, New York, NY).
31. Ones DS, Viswesvaran C, Schmidt FL (2017) Realizing the full potential of psychometric meta-analysis for a cumulative science and practice of human resource management. *Hum Resour Manage Rev* 27:201–215.
32. Whiston SC, Li P (2011) Meta-analysis: A systematic method for synthesizing counseling research. *J Couns Devel* 89:273–281.
33. Lipsey M, Wilson D (2001) *Practical Meta-Analysis* (Sage, Thousand Oaks, CA).
34. Begg CB, Mazumdar M (1994) Operating characteristics of a rank correlation test for publication bias. *Biometrics* 50:1088–1101.
35. Rothstein HR, Sutton AJ, Borenstein M (2005) *Publication Bias in Meta-Analysis: Prevention, Assessment, and Adjustments* (Wiley, West Sussex, UK).
36. Becker BJ (2005) Failsafe *N* or file drawer number. *Publication Bias in Meta-Analysis: Prevention, Assessment, and Adjustments*, eds Rothstein HR, Sutton AJ, Borenstein M (Wiley, West Sussex, UK), 111–125.
37. Viswesvaran C, Barrick MR, Ones DS (1993) How definitive are conclusions based on survey data: Estimating robustness to nonresponse. *Pers Psychol* 46:551–567.
38. Dalton DR, Aguinis H, Dalton CM, Bosco, FA, Pierce CA (2012) Revisiting the file drawer problem in meta-analysis: An assessment of published and nonpublished correlation matrices. *Pers Psychol* 65:221–249.
39. Paterson TA, Harms PD, Steel P, Credé M (2016) An assessment of the magnitude of effect sizes: Evidence from 30 years of meta-analysis in management. *J Leadersh Org Stud* 23:66–81.

40. Judge TA, Bono JE (2000) Five-Factor Model of personality and transformational leadership. *J Appl Psychol* 85:751–765.
41. Monroe MJ (1997) *Leadership of organizational change: Antecedents and implications*. PhD dissertation (ProQuest Dissertations and Theses Accession Order No. 9729239).
42. Furnham A, (1994) The validity of the SHL Customer Service Questionnaire (CSQ). *Int J Select Assess* 2:157–165.
43. Nyfield G, Gibbons PJ, Baron H, Robertson I (1995) *The Cross-Cultural Validity of Management Assessment Methods* (Saville & Holdsworth, Surrey, UK).
44. Adkins CL, Naumann SE (2001) Situational constraints on the achievement-performance relationship: A service sector study. *J Organ Behav* 22:453–465.
45. Furnham A, Stringfield P (1993) Personality and work performance: Myers-Briggs Type Indicator correlates of managerial performance in two cultures. *Pers Individ Differ* 14:145–153.
46. Sackett PR, Gruys ML, Ellington JE (1998). Ability-personality interactions when predicting job performance. *J Appl Psychol* 83:545–556.
47. Slocum JW Jr, Hand HH (1971) Prediction of job success and employee satisfaction for executives and foremen. *Train Dev J* 25:28–36.
48. Kepes S, Banks GC, McDaniel M (2011, April) *Big Five validity and publication bias: Conscientiousness worse than assumed*. Paper presented at the annual meeting of the Society for Industrial and Organizational Psychology, Chicago, IL.
49. Kepes S, McDaniel M (2013) How trustworthy is the scientific literature in Industrial and Organizational Psychology? *Ind Organ Psychol-US* 6:1754-9426
50. Richardson M, Abraham C, Bond R (2012) Psychological correlates of university students' academic performance: A systematic review and meta-analysis. *Psychol Bull* 138:353–387.
51. Vedel A (2016) Big Five personality group differences across academic majors: A systematic review. *Pers Individ Differ* 92:1–10.
52. Alarcon G, Eschleman KJ, Bowling NA (2009) Relationships between personality variables and burnout: A meta-analysis. *Work Stress* 23:244–263.
53. Salgado JF (2003) Predicting job performance using FFM and non-FFM personality measures. *J Occup Organ Psych* 76:323–346.
54. Joseph DL, Newman DA (2010) Emotional intelligence: An integrative meta-analysis and cascading model. *J Appl Psychol* 95:54–78.
55. Vize CE, Miller JD, Lynam DR (2018) FFM facets and their relations with different forms of antisocial behavior: An expanded meta-analysis. *J Crim Just* 57:67–75.
56. Christian MS, Garza AS, Slaughter JE (2011) Work engagement: A quantitative review and test of its relations with task and contextual performance *Pers Psychol* 64:89–136.
57. Wiernik BM (2016) *The nomological network of classic and contemporary career preferences*. PhD dissertation. (University of Minnesota, Minneapolis, MN).
58. Osipow SH, Gati I (1998) Construct and concurrent validity of the career decision-making difficulties questionnaire *J Career Assess* 6:347–364.
59. Mesmer-Magnus JR, Viswesvaran C (2005) Convergence between measures of work-to-family and family-to-work conflict: A meta-analytic examination. *J Vocat Behav* 67:215–223.
60. Ng TW, Eby, LT, Sorensen, KL, Feldman, DC (2005) Predictors of objective and subjective career success: A meta-analysis. *Pers Psychol* 58: 367–408.

61. Dalal RS (2005) A meta-analysis of the relationship between organizational citizenship behavior and counterproductive work behavior. *J Appl Psychol* 90:1241–1255.
62. Beatty AS, Walmsley PT, Sackett PR, Kuncel NK, Koch AJ (2015) The reliability of college grades *Educ Meas-Issues Pra* 34:31–4.
63. Viswesvaran C, Ones DS, Schmidt FL (1996) Comparative analysis of the reliability of job performance ratings. *J Appl Psychol* 81:557–574.

### References for Meta-Analyses Included in Second-Order Review

1. af Wåhlberg, A., Barraclough, P., & Freeman, J. (2017). Personality versus traffic accidents; meta-analysis of real and method effects. *Transportation Research Part F: Traffic Psychology and Behaviour*, *44*, 90–104. <https://doi.org/10.1016/j.trf.2016.10.009>
2. Allen, T. D., Johnson, R. C., Saboe, K. N., Cho, E., Dumani, S., & Evans, S. (2012). Dispositional variables and work-family conflict: A meta-analysis. *Journal of Vocational Behavior*, *80*, 17–26. <https://doi.org/10.1016/j.jvb.2011.04.004>
3. Banks, G. C., Engemann, K. N., Williams, C. E., Gooty, J., McCauley, K. D., & Medaugh, M. R. (2017). A meta-analytic review and future research agenda of charismatic leadership. *The Leadership Quarterly*, *28*, 508–529. <http://dx.doi.org/10.1016/j.leaqua.2016.12.003>
4. Barrick, M. R., & Mount, M. K. (1991). The Big Five personality dimensions and job performance: A meta-analysis. *Personnel Psychology*, *44*, 1–26. <https://doi.org/10.1111/j.1744-6570.1991.tb00688.x>
5. Berry, C. M., Carpenter, N. C., & Barratt, C. L. (2012). Do other-reports of counterproductive work behavior provide an incremental contribution over self-reports? A meta-analytic comparison. *Journal of Applied Psychology*, *97*, 613–636. <https://doi.org/10.1037/a0026739>
6. Berry, C. M., Ones, D. S., & Sackett, P. R. (2007). Interpersonal deviance, organizational deviance, and their common correlates: A review and meta-analysis. *Journal of Applied Psychology*, *92*, 410–424. <https://doi.org/10.1037/0021-9010.92.2.410>
7. Beus, J. M., Dhanani, L. Y., & McCord, M. A. (2015). A meta-analysis of personality and workplace safety: Addressing unanswered questions. *Journal of Applied Psychology*, *100*, 481–498. <https://doi.org/10.1037/a0037916>
8. Beus, J. M., & Whitman, D. S. (2012). The relationship between typical and maximum performance: A meta-analytic examination. *Human Performance*, *25*, 355–376. <https://doi.org/10.1080/08959285.2012.721831>
9. Birkeland, S. A., Manson, T. M., Kisamore, J. L., Brannick, M. T., & Smith, M. A. (2006). A meta-analytic investigation of job applicant faking on personality measures. *International Journal of Selection and Assessment*, *14*, 317–335. <https://doi.org/10.1111/j.1468-2389.2006.00354.x>
10. Blume, B. D., Ford, J., Baldwin, T. T., & Huang, J. L. (2010). Transfer of training: A meta-analytic review. *Journal of Management*, *36*, 1065–1105. <https://doi.org/10.1177/0149206309352880>
11. Bono, J. E., & Judge, T. A. (2004). Personality and transformational and transactional leadership: A meta-analysis. *Journal of Applied Psychology*, *89*, 901–910. <https://doi.org/10.1037/0021-9010.89.5.901>
12. Carpenter, N. C., & Berry, C. M. (2017). Are counterproductive work behavior and withdrawal empirically distinct? A meta-analytic investigation. *Journal of Management*, *43*, 834–863. <https://doi.org/10.1177/0149206314544743>
13. Chamberlin, M., Newton, D. W., & Lepine, J. A. (2017). A meta-analysis of voice and its promotive and prohibitive forms: Identification of key associations, distinctions, and future research directions. *Personnel Psychology*, *70*, 11–71. <https://doi.org/10.1111/peps.12185>
14. Chiaburu, D. S., Oh, I.-S., Berry, C. M., Li, N., & Gardner, R. G. (2011). The Five-Factor Model of personality traits and organizational citizenship behaviors: A meta-analysis. *Journal of Applied Psychology*, *96*, 1140–1166. <https://doi.org/10.1037/a0024004>

15. Choi, D., Oh, I.-S., & Colbert, A. E. (2015). Understanding organizational commitment: A meta-analytic examination of the roles of the Five-Factor Model of personality and culture. *Journal of Applied Psychology, 100*, 1542–1567. <https://doi.org/10.1037/apl0000014>
16. Clark, M. A., Michel, J. S., Zhdanova, L., Pui, S. Y., & Baltes, B. B. (2016). All work and no play? A meta-analytic examination of the correlates and outcomes of workaholism. *Journal of Management, 42*, 1836–1873. <https://doi.org/1177/0149206314522301>
17. Conway, J. M., Lombardo, K., & Sanders, K. C. (2001). A meta-analysis of incremental validity and nomological networks for subordinate and peer rating. *Human Performance, 14*, 267–303. [https://doi.org/10.1207/S15327043HUP1404\\_1](https://doi.org/10.1207/S15327043HUP1404_1)
18. Credé, M., & Kuncel, N. R. (2008). Study habits, skills, and attitudes: The third pillar supporting collegiate academic performance. *Perspectives on Psychological Science, 3*, 425–453. <https://doi.org/10.1111/j.1745-6924.2008.00089.x>
19. Credé, M., & Niehorster, S. (2012). Adjustment to college as measured by the Student Adaptation to College Questionnaire: A quantitative review of its structure and relationships with correlates and consequences. *Educational Psychology Review, 24*, 133–165. <https://doi.org/10.1007/s10648-011-9184-5>
20. Credé, M., Roch, S. G., & Kieszczynka, U. M. (2010). Class attendance in college: A meta-analytic review of the relationship of class attendance with grades and student characteristics. *Review of Educational Research, 80*, 272–295. <https://doi.org/10.3102/0034654310362998>
21. Darr, W. (2011). Military personality research: A meta-analysis of the Self-Description Inventory. *Military Psychology, 23*, 272–296. <https://doi.org/10.1080/08995605.2011.570583>
22. Deinert, A., Homan, A. C., Boer, D., Voelpel, S. C., & Gutermann, D. (2015). Transformational leadership sub-dimensions and their link to leaders' personality and performance. *The Leadership Quarterly, 26*, 1095–1120. <https://doi.org/10.1016/j.leaqua.2015.08.001>
23. DeRue, D. S., Nahrgang, J. D., Wellman, N. E. D., & Humphrey, S. E. (2011). Trait and behavioral theories of leadership: An integration and meta-analytic test of their relative validity. *Personnel Psychology, 64*, 7–52. <https://doi.org/10.1111/j.1744-6570.2010.01201.x>
24. Dilchert, S., & Ones, D. S. (2009). Assessment center dimensions: Individual differences correlates and meta-analytic incremental validity. *International Journal of Selection and Assessment, 17*, 254–270. <https://doi.org/10.1111/j.1468-2389.2009.00468.x>
25. Dulebohn, J. H., Bommer, W. H., Liden, R. C., Brouer, R. L., & Ferris, G. R. (2012). A meta-analysis of antecedents and consequences of leader-member exchange: Integrating the past with an eye toward the future. *Journal of Management, 38*, 1715–1759. <https://doi.org/10.1177/0149206311415280>
26. Fang, R., Landis, B., Zhang, Z., Anderson, M. H., Shaw, J. D., & Kilduff, M. (2015). Integrating personality and social networks: A meta-analysis of personality, network position, and work outcomes in organizations. *Organization Science, 26*, 1243–1260. <https://doi.org/10.1287/orsc.2015.0972>
27. Giluk, T. L., & Postlethwaite, B. E. (2015). Big Five personality and academic dishonesty: A meta-analytic review. *Personality and Individual Differences, 72*, 59–67. <https://doi.org/10.1016/j.paid.2014.08.027>
28. Gnams, T. (2015). What makes a computer wiz? Linking personality traits and programming aptitude. *Journal of Research in Personality, 58*, 31–34. <https://doi.org/10.1016/j.jrp.2015.07.004>

29. Hall, J. A., Andrzejewski, S. A., & Yopchick, J. E. (2009). Psychosocial correlates of interpersonal sensitivity: A meta-analysis. *Journal of Nonverbal Behavior*, *33*, 149–180. <https://doi.org/10.1007/s10919-009-0070-5>
30. Harari, M. B., Reaves, A. C., Beane, D. A., Laginess, A. J., & Viswesvaran, C. (2018). Personality and expatriate adjustment: A meta-analysis. *Journal of Occupational and Organizational Psychology*, *91*, 486–517. <https://doi.org/10.1111/joop.12215>
31. Harari, M. B., Rudolph, C. W., & Laginess, A. J. (2015). Does rater personality matter? A meta-analysis of rater Big Five–performance rating relationships. *Journal of Occupational and Organizational Psychology*, *88*, 387–414. <https://doi.org/10.1111/joop.12086>
32. Hausknecht, J. P., Day, D. V., & Thomas, S. C. (2004). Applicant reactions to selection procedures: An updated model and meta-analysis. *Personnel Psychology*, *57*, 639–683. <https://doi.org/10.1111/j.1744-6570.2004.00003.x>
33. Hoffman, B. J., Kennedy, C. L., LoPilato, A. C., Monahan, E. L., & Lance, C. E. (2015). A review of the content, criterion-related, and construct-related validity of assessment center exercises. *Journal of Applied Psychology*, *100*, 1143–1168. <https://doi.org/10.1037/a0038707>
34. Hogan, J., & Holland, B. (2003). Using theory to evaluate personality and job-performance relations: A socioanalytic perspective. *Journal of Applied Psychology*, *88*, 100–112. <https://doi.org/10.1037/0021-9010.88.1.100>
35. Hough, L. M. (1992). The ‘Big Five’ personality variables--construct confusion: Description versus prediction. *Human Performance*, *5*, 139–155. <https://doi.org/10.1080/08959285.1992.9667929>
36. Huang, J. L., Cropanzano, R., Li, A., Shao, P., Zhang, X., & Li, Y. (2017). Employee conscientiousness, agreeableness, and supervisor justice rule compliance: A three-study investigation. *Journal of Applied Psychology*, *102*, 1564–1589. <https://doi.org/10.1037/apl0000248>
37. Huang, J. L., Ryan, A. M., Zabel, K. L., & Palmer, A. (2014). Personality and adaptive performance at work: A meta-analytic investigation. *Journal of Applied Psychology*, *99*, 162–179. <https://doi.org/10.1037/a0034285>
38. Hurtz, G. M., & Donovan, J. J. (2000). Personality and job performance: The Big Five revisited. *Journal of Applied Psychology*, *85*, 869–879. <https://doi.org/10.1037/0021-9010.85.6.869>
39. Jones, S. E., Miller, J. D., & Lynam, D. R. (2011). Personality, antisocial behavior, and aggression: A meta-analytic review. *Journal of Criminal Justice*, *39*, 329–337. <https://doi.org/10.1016/j.jcrimjus.2011.03.004>
40. Joseph, D. L., Jin, J., Newman, D. A., & O’Boyle, E. H. (2015). Why does self-reported emotional intelligence predict job performance? A meta-analytic investigation of mixed EI. *Journal of Applied Psychology*, *100*, 298–342. <https://doi.org/10.1037/a0037681>
41. Judge, T. A., Bono, J. E., Ilies, R., & Gerhardt, M. W. (2002). Personality and leadership: A qualitative and quantitative review. *Journal of Applied Psychology*, *87*, 765–780. <https://doi.org/10.1037/0021-9010.87.4.765>
42. Judge, T. A., Heller, D., & Mount, M. K. (2002). Five-Factor Model of personality and job satisfaction: A meta-analysis. *Journal of Applied Psychology*, *87*, 530–541. <https://doi.org/10.1037/0021-9010.87.3.530>
43. Judge, T. A., & Ilies, R. (2002). Relationship of personality to performance motivation: A meta-analytic review. *Journal of Applied Psychology*, *87*, 797–807. <https://doi.org/10.1037/0021-9010.87.4.797>

44. Judge, T. A., Rodell, J. B., Klinger, R. L., Simon, L. S., & Crawford, E. R. (2013). Hierarchical representations of the Five-Factor Model of personality in predicting job performance: Integrating three organizing frameworks with two theoretical perspectives. *Journal of Applied Psychology, 98*, 875–925. <https://doi.org/10.1037/a0033901>
45. Klassen, R. M., & Tze, V. M. C. (2014). Teachers' self-efficacy, personality, and teaching effectiveness: A meta-analysis. *Educational Research Review, 12*, 59–76. <https://doi.org/10.1016/j.edurev.2014.06.001>
46. Lanaj, K., Chang, C.-H., & Johnson, R. E. (2012). Regulatory focus and work-related outcomes: A review and meta-analysis. *Psychological Bulletin, 138*, 998–1034. <https://doi.org/10.1037/a0027723>
47. Li, N., Barrick, M. R., Zimmerman, R. D., & Chiaburu, D. S. (2014). Retaining the productive employee: The role of personality. *The Academy of Management Annals, 8*, 347–395. <https://doi.org/10.1080/19416520.2014.890368>
48. Mackey, J. D., Frieder, R. E., Brees, J. R., & Martinko, M. J. (2017). Abusive supervision: A meta-analysis and empirical review. *Journal of Management, 43*, 1940–1965. <https://doi.org/10.1177/0149206315573997>
49. Martincin, K. M., & Stead, G. B. (2015). Five-Factor Model and difficulties in career decision making: A meta-analysis. *Journal of Career Assessment, 23*, 3–19. <https://doi.org/10.1177/1069072714523081>
50. McAbee, S. T., & Oswald, F. L. (2013). The criterion-related validity of personality measures for predicting GPA: A meta-analytic validity competition. *Psychological Assessment, 25*, 532–544. <https://doi.org/10.1037/a0031748>
51. McDaniel, M. A., Hartman, N. S., Whetzel, D. L., & Grubb, W. (2007). Situational judgment tests, response instructions, and validity: A meta-analysis. *Personnel Psychology, 60*, 63–91. <https://doi.org/10.1111/j.1744-6570.2007.00065.x>
52. Mercado, B. K., Giordano, C., & Dilchert, S. (2017). A meta-analytic investigation of cyberloafing. *Career Development International, 22*, 546–564. <https://doi.org/10.1108/CDI-08-2017-0142>
53. Meriac, J. P., Hoffman, B. J., Woehr, D. J., & Fleisher, M. S. (2008). Further evidence for the validity of assessment center dimensions: A meta-analysis of the incremental criterion-related validity of dimension ratings. *Journal of Applied Psychology, 93*, 1042–1052. <https://doi.org/10.1037/0021-9010.93.5.1042>
54. Michel, J. S., Clark, M. A., & Jaramillo, D. (2011). The role of the Five Factor Model of personality in the perceptions of negative and positive forms of work-nonwork spillover: A meta-analytic review. *Journal of Vocational Behavior, 79*, 191–203. <https://doi.org/10.1016/j.jvb.2010.12.010>
55. Miller, J. D., & Lynam, D. (2001). Structural models of personality and their relation to antisocial behavior: A meta-analytic review. *Criminology, 39*, 765–798. <https://doi.org/10.1111/j.1745-9125.2001.tb00940.x>
56. Mol, S. T. (2005). Predicting expatriate job performance for selection purposes: A quantitative review. *Journal of Cross-Cultural Psychology, 36*, 590–62. <https://doi.org/10.1177/0022022105278544>
57. Mount, M. K., Barrick, M. R., Scullen, S. M., & Rounds, J. B. (2005). Higher-order dimensions of the Big Five personality traits and the Big Six vocational interest types. *Personnel Psychology, 58*, 447–478. <https://doi.org/10.1111/j.1744-6570.2005.00468.x>

58. Ng, T. W. H., & Feldman, D. C. (2010). Human capital and objective indicators of career success: The mediating effects of cognitive ability and Conscientiousness. *Journal of Occupational and Organizational Psychology*, *83*, 207–235. <https://doi.org/10.1348/096317909X414584>
59. Ng, T. W. H., & Feldman, D. C. (2014a). A conservation of resources perspective on career hurdles and salary attainment. *Journal of Vocational Behavior*, *85*, 156–168. <https://doi.org/10.1016/j.jvb.2014.05.008>
60. Ng, T. W. H., & Feldman, D. C. (2014b). Subjective career success: A meta-analytic review. *Journal of Vocational Behavior*, *85*, 169–179. <https://doi.org/10.1016/j.jvb.2014.06.001>
61. Nielsen, M. B., Glasø, L., & Einarsen, S. (2017). Exposure to workplace harassment and the Five Factor Model of personality: A meta-analysis. *Personality and Individual Differences*, *104*, 195–206. <https://doi.org/10.1016/j.paid.2016.08.015>
62. Parks-Leduc, L., Feldman, G., & Bardi, A. (2015). Personality traits and personal values: A meta-analysis. *Personality and Social Psychology Review*, *19*, 3–27. <https://doi.org/10.1177/1088868314538548>
63. Payne, S. C., Youngcourt, S. S., & Beaubien, J. M. (2007). A meta-analytic examination of the goal orientation nomological net. *Journal of Applied Psychology*, *92*, 128–150. <https://doi.org/10.1037/0021-9010.92.1.128>
64. Poropat, A. E. (2009). A meta-analysis of the Five-Factor Model of personality and academic performance. *Psychological Bulletin*, *135*, 322–338. <https://doi.org/10.1037/a0014996>
65. Puryear, J. S., Kettler, T., & Rinn, A. N. (2017). Relationships of personality to differential conceptions of creativity: A systematic review. *Psychology of Aesthetics, Creativity, and the Arts*, *11*, 59–68. <https://doi.org/10.1037/aca0000079>
66. Rojon, C., McDowall, A., & Saunders, M. N. K. (2015). The relationships between traditional selection assessments and workplace performance criteria specificity: A comparative meta-analysis. *Human Performance*, *28*, 1–25. <https://doi.org/10.1080/08959285.2014.974757>
67. Roth, P. L., Iddekinge, C. H., Huffcutt, A. I., Eidson, C. E., & Schmit, M. J. (2005). Personality saturation in structured interviews. *International Journal of Selection and Assessment*, *13*, 261–273. <https://doi.org/10.1111/j.1468-2389.2005.00323.x>
68. Rubenstein, A. L., Eberly, M. B., Lee, T. W., & Mitchell, T. R. (2018). Surveying the forest: A meta-analysis, moderator investigation, and future-oriented discussion of the antecedents of voluntary employee turnover. *Personnel Psychology*, *71*, 23–65. <https://doi.org/10.1111/peps.12226>
69. Rudolph, C. W., Katz, I. M., Lavigne, K. N., & Zacher, H. (2017). Job crafting: A meta-analysis of relationships with individual differences, job characteristics, and work outcomes. *Journal of Vocational Behavior*, *102*, 112–138. <https://doi.org/10.1016/j.jvb.2017.05.008>
70. Rudolph, C. W., Lavigne, K. N., & Zacher, H. (2017). Career adaptability: A meta-analysis of relationships with measures of adaptivity, adapting responses, and adaptation results. *Journal of Vocational Behavior*, *98*, 17–34. <https://doi.org/10.1016/j.jvb.2016.09.002>
71. Salgado, J. F. (1997). The Five Factor Model of personality and job performance in the European Community. *Journal of Applied Psychology*, *82*, 30–43. <https://doi.org/10.1037/0021-9010.82.1.30>
72. Salgado, J. F., & Moscoso, S. (2002). Comprehensive meta-analysis of the construct validity of the employment interview. *European Journal of Work and Organizational Psychology*, *11*, 299–324. <https://doi.org/10.1080/13594320244000184>



73. Salgado, J. F., & Táuriz, G. (2014). The Five-Factor Model, forced-choice personality inventories and performance: A comprehensive meta-analysis of academic and occupational validity studies. *European Journal of Work and Organizational Psychology*, 23, 3–30. <https://doi.org/10.1080/1359432X.2012.716198>
74. Salgado, J. F., Anderson, N., & Tauriz, G. (2015). The validity of ipsative and quasi-ipsative forced-choice personality inventories for different occupational groups: A comprehensive meta-analysis. *Journal of Occupational and Organizational Psychology*, 88, 797–834. <https://doi.org/10.1111/joop.12098>
75. Schmidt, F. L., & Oh, I.-S. (2013). Methods for second order meta-analysis and illustrative applications. *Organizational Behavior and Human Decision Processes*, 121, 204–218. <https://doi.org/10.1016/j.obhdp.2013.03.002>
76. Seltzer, B. K., Ones, D. S., & Tatar, A. (2017). Using personality facets to understand the nature of personality–satisfaction relationships: Findings from meta-analytic bi-factor latent modeling. *Career Development International*, 22, 477–506. <https://doi.org/10.1108/CDI-08-2017-0141>.
77. Shaffer, J. A., & Postlethwaite, B. E. (2012). A matter of context: A meta-analytic investigation of the relative validity of contextualized and noncontextualized personality measures. *Personnel Psychology*, 65, 445–494. <https://doi.org/10.1111/j.1744-6570.2012.01250.x>
78. Sharma, S., Bottom, W. P., & Elfenbein, H. A. (2013). On the role of personality, cognitive ability, and emotional intelligence in predicting negotiation outcomes: A meta-analysis. *Organizational Psychology Review*, 3, 293–336. <https://doi.org/10.1177/2041386613505857>
79. Staggs, G. D., Larson, L. M., & Borgen, F. H. (2007). Convergence of personality and interests: Meta-analysis of the Multidimensional Personality Questionnaire and the Strong Interest Inventory. *Journal of Career Assessment*, 15, 423–445. <https://doi.org/10.1177/1069072707305760>
80. Stajkovic, A. D., Bandura, A., Locke, E. A., Lee, D., & Sergent, K. (2018). Test of three conceptual models of influence of the big five personality traits and self-efficacy on academic performance: A meta-analytic path-analysis. *Personality and Individual Differences*, 120, 238–245. <https://doi.org/10.1016/j.paid.2017.08.014>
81. Steel, P. (2007). The nature of procrastination: A meta-analytic and theoretical review of quintessential self-regulatory failure. *Psychological Bulletin*, 133, 65–94. <https://doi.org/10.1037/0033-2909.133.1.65>
82. Steel, P., Schmidt, J., & Shultz, J. (2008). Refining the relationship between personality and subjective well-being. *Psychological Bulletin*, 134, 138–161. <https://doi.org/10.1037/0033-2909.134.1.138>
83. Swider, B. W., & Zimmerman, R. D. (2010). Born to burnout: A meta-analytic path model of personality, job burnout, and work outcomes. *Journal of Vocational Behavior*, 76, 487–506. <https://doi.org/10.1016/j.jvb.2010.01.003>
84. Swider, B. W., Zimmerman, R. D., Charlier, S. D., & Pierotti, A. J. (2015). Deep-level and surface-level individual differences and applicant attraction to organizations: A meta-analysis. *Journal of Vocational Behavior*, 88, 73–83. <https://doi.org/10.1016/j.jvb.2015.01.005>
85. van Aarde, N., Meiring, D., & Wiernik, B. M. (2017). The validity of the Big Five personality traits for job performance: Meta-analyses of South African studies. *International Journal of Selection and Assessment*, 25, 223–239. <https://doi.org/10.1111/ijsa.12175>

86. van den Broeck, A., Ferris, D. L., Chang, C.-H., & Rosen, C. C. (2016). A review of Self-Determination Theory's basic psychological needs at work. *Journal of Management*, *42*, 1195–1229. <https://doi.org/10.1177/0149206316632058>
87. van Eerde, W. (2004). Procrastination in academic settings and the Big Five model of personality: A meta-analysis. In H. C. Schouwenburg, C. H. Lay, T. A. Pychyl, & J. R. Ferrari (Eds.), *Counseling the procrastinator in academic settings* (pp. 29–40). Washington, DC: American Psychological Association. <https://doi.org/10.1037/10808-003>
88. van Hooft, E. A. J., Wanberg, C., Kanfer, R., Kammeyer-Mueller, J., & Basbug, G. (2015). Job search and employment success predictors: A meta-analytic test of motivation and self-regulation. *Academy of Management Proceedings*, *75*, 1-1. <https://doi.org/10.5465/ambpp.2015.15428symposium>
89. You, X., Huang, J., Wang, Y., & Bao, X. (2015). Relationships between individual-level factors and burnout: A meta-analysis of Chinese participants. *Personality and Individual Differences*, *74*, 139–145. <https://doi.org/10.1016/j.paid.2014.09.048>
90. Young, H. R., Glerum, D. R., Wang, W., & Joseph, D. L. (2018). Who are the most engaged at work? A meta-analysis of personality and employee engagement. *Journal of Organizational Behavior*, *39*, 1330–1346. <https://doi.org/10.1002/job.2303>
91. Zhao, H. Seibert, S. E., & Lumpkin, G. T. (2010). The relationship of personality to entrepreneurial intentions and performance: A meta-analytic review. *Journal of Management*, *36*, 381–404. <https://doi.org/10.1177/0149206309335187>
92. Zimmerman, R. D. (2008). Understanding the impact of personality traits on individuals' turnover decisions: A meta-analytic path model. *Personnel Psychology*, *61*, 309–348. <https://doi.org/10.1111/j.1744-6570.2008.00115>
